# Supplementary material for: Live imaging of hair bundle polarity acquisition demonstrates a critical timeline for transcription factor Emx2
Source: eLife. 2020 Sep 23;9:e59282. doi: 10.7554/eLife.59282 (PMC7535933; doi:10.7554/eLife.59282)
Supplement: Figure 2—figure supplement 2—source data 1. [file elife-59282-fig2-figsupp2-data1.xlsx]

## Sheet: Sheet1
	Figure 2—-figure supplement 2--source data 1
	The x-y moving speeds of centrioles in Md HC1 and Md HC2 during centriole migration.
	Md HC1 (Phase I)				Md HC1 (phase II)				Md HC2 (Phase I)				Md HC2 (Phase II)
	Time (hr:min)	Phase I MC x-y migration speed (μm)	Phase I DC x-y migration speed (μm)		Time (hr:min)	Phase II MC x-y migration speed (μm)	Phase II DC x-y migration speed (μm)		Time (hr:min)	Phase I MC x-y migration speed (μm)	Phase I DC x-y migration speed (μm)		Time (hr:min)	Phase II MC x-y migration speed (μm)	Phase II DC x-y migration speed (μm)
	00:10:00	0.114898	0.327686		09:00:00	0.06131	0.303325		00:10:00	0.200217	0.0877382		05:10:00	0.161846	0.512977
	00:20:00	0.0933055	0.454471		09:10:00	0.129442	0.136625		00:20:00	0.10821	0.163679		05:20:00	0.0635862	0.233283
	00:30:00	0.117761	0.535641		09:20:00	0.161101	0.0361077		00:30:00	0.0609609	0.0368667		05:30:00	0.0734245	0.425209
	00:40:00	0.0964144	0.311702		09:30:00	0.0291491	0.390222		00:40:00	0.177116	0.0465364		05:40:00	0.40464	0.624623
	00:50:00	0.119318	0.270024		09:40:00	0.1219	0.126595		00:50:00	0.0635872	0.307366		05:50:00	0.380268	0.316401
	01:00:00	0.163901	0.269903		09:50:00	0.0909481	0.25537		01:00:00	0.0787772	0.0372267		06:00:00	0.319793	0.672107
	01:10:00	0.0287675	0.195112		10:00:00	0.142744	0.163978		01:10:00	0.242212	0.17442		06:10:00	0.245239	0.211128
	01:20:00	0.0221388	0.111477		10:10:00	0.144708	0.200095		01:20:00	0.222741	0.151931		06:20:00	0.257839	0.396172
	01:30:00	0.163163	0.573509		10:20:00	0.159215	0.208089		01:30:00	0.174582	0.805062		06:30:00	0.198153	0.130649
	01:40:00	0.184354	0.0485921		10:30:00	0.234117	0.092676		01:40:00	0.29276	0.0343521		06:40:00	0.268538	0.148662
	01:50:00	0.203433	0.542828		10:40:00	0.205368	0.151956		01:50:00	0.300963	0.112449		06:50:00	0.154348	0.310616
	02:00:00	0.0158611	0.248395		10:50:00	0.228196	0.251598		02:00:00	0.130145	0.0932577		07:00:00	0.0334769	0.314816
	02:10:00	0.0319879	0.251283		11:00:00	0.180553	0.243847		02:10:00	0.170787	0.121721		07:10:00	0.179048	0.196283
	02:20:00	0.0559382	0.106081		11:10:00	0.249007	0.172812		02:20:00	0.1116	0.280362		07:20:00	0.0530141	0.281638
	02:30:00	0.360609	0.179208		11:20:00	0.0735009	0.0366775		02:30:00	0.201661	0.423894		07:30:00	0.194054	0.261174
	02:40:00	0.435359	0.159631		11:30:00	0.0650026	0.291304		02:40:00	0.260602	0.417853		07:40:00	0.17484	0.182631
	02:50:00	0.188157	0.421747		11:40:00	0.257233	0.219232		02:50:00	0.102023	0.156202		07:50:00	0.247981	0.304104
	03:00:00	0.0869009	0.478173		11:50:00	0.0879342	0.0832303		03:00:00	0.252661	0.437758		08:00:00	0.162545	0.336887
	03:10:00	0.064517	0.0933628		12:00:00	0.308287	0.476572		03:10:00	0.0777744	0.259333		08:10:00	0.187539	0.438924
	03:20:00	0.0533395	0.42278		12:10:00	0.26017	0.458918		03:20:00	0.194569	0.226909		08:20:00	0.107485	0.439146
	03:30:00	0.0574607	0.34272		12:20:00	0.237461	0.478836		03:30:00	0.28846	0.163203		08:30:00	0.115843	0.050515
	03:40:00	0.0802713	0.285595		12:30:00	0.200059	0.251687		03:40:00	0.272204	0.552301		08:40:00	0.248075	0.306121
	03:50:00	0.105699	0.847118		12:40:00	0.174453	0.181731		03:50:00	0.170805	0.201685		08:50:00	0.214499	0.0319942
	04:00:00	0.165715	1.34336		12:50:00	0.0574616	0.242193		04:00:00	0.105901	0.123094		09:00:00	0.189804	0.411735
	04:10:00	0.147871	0.66708		13:00:00	0.267157	0.094029		04:10:00	0.0544766	0.474463		09:10:00	0.25822	0.191902
	04:20:00	0.167625	0.632515		13:10:00	0.127539	0.451195		04:20:00	0.0461726	0.480209		09:20:00	0.161053	0.37504
	04:30:00	0.0639303	0.849191		13:20:00	0.116886	0.174747		04:30:00	0.0593221	0.536008		09:30:00	0.233483	0.14216
	04:40:00	0.0255904	1.29177		13:30:00	0.197716	0.242483		04:40:00	0.193351	0.524317		09:40:00	0.0518824	0.182344
	04:50:00	0.135662	0.278074		13:40:00	0.171397	0.312818		04:50:00	0.0554025	0.0895		09:50:00	0.0931808	0.442911
	05:00:00	0.0255355	0.758492		13:50:00	0.134014	0.0891845		Average	0.161036	0.2593		10:00:00	0.187577	0.621246
	05:10:00	0.152907	0.230705		14:00:00	0.0285854	0.236892		p-value	0.0147488			10:10:00	0.259077	0.00732462
	05:20:00	0.221837	0.62465		14:10:00	0.1533	0.152598						10:20:00	0.119677	0.375923
	05:30:00	0.18876	0.26859		14:20:00	0.0522074	0.269862						10:30:00	0.169509	0.414967
	05:40:00	0.211368	1.06253		14:30:00	0.0971909	0.185818						10:40:00	0.100631	0.620487
	05:50:00	0.179069	0.192284		14:40:00	0.163878	0.0524999						10:50:00	0.123414	0.326007
	06:00:00	0.139339	0.31655		14:50:00	0.10265	0.212816						11:00:00	0.125838	0.341684
	06:10:00	0.0758084	0.492567		15:00:00	0.222273	0.159283						11:10:00	0.250481	0.437429
	06:20:00	0.207464	0.528917		15:10:00	0.192072	0.305051						11:20:00	0.216748	0.398862
	06:30:00	0.14068	0.407049		15:20:00	0.082699	0.537878						11:30:00	0.369256	0.339659
	06:40:00	0.101822	0.147153		15:30:00	0.0494697	0.131105						11:40:00	0.309051	0.489921
	06:50:00	0.160088	0.338997		15:40:00	0.14933	0.390873						11:50:00	0.323657	0.312435
	07:00:00	0.081294	0.0613117		15:50:00	0.14487	0.253842						12:00:00	0.388629	0.401601
	07:10:00	0.393889	0.078316		16:00:00	0.191035	0.266655						12:10:00	0.271504	0.285032
	07:20:00	0.199237	0.448528		16:10:00	0.222149	0.270514						12:20:00	0.167267	0.323207
	07:30:00	0.0734788	0.186202		16:20:00	0.191787	0.122098						12:30:00	0.233089	0.159403
	07:40:00	0.220061	0.29925		16:30:00	0.0676312	0.240389						12:40:00	0.0938389	0.265375
	07:50:00	0.126818	0.447561		16:40:00	0.239037	0.278826						12:50:00	0.395901	0.312564
	08:00:00	0.280474	0.565893		16:50:00	0.0383753	0.173593						13:00:00	0.192663	0.127118
	08:10:00	0.333657	0.346507		17:00:00	0.154368	0.171211						13:10:00	0.294957	0.0924584
	08:20:00	0.0435777	0.615143		17:10:00	0.0869604	0.141974						13:20:00	0.174006	0.147347
	08:30:00	0.262325	0.477749		17:20:00	0.0499462	0.191862						13:30:00	0.192142	0.157641
	08:40:00	0.257564	0.16936		17:30:00	0.200225	0.121856						13:40:00	0.227789	0.126076
	Average	0.146673	0.415449		17:40:00	0.287562	0.173102						13:50:00	0.216789	0.0892676
	p-value	2.00356e-08			17:50:00	0.163536	0.178751						14:00:00	0.174158	0.0845319
					18:00:00	0.162006	0.268866						14:10:00	0.315763	0.840337
					18:10:00	0.243846	0.525373						14:20:00	0.366898	0.510078
					18:20:00	0.092185	0.210003						14:30:00	0.308462	0.311831
					18:30:00	0.185944	0.305936						14:40:00	0.162034	0.112365
					18:40:00	0.195919	0.228665						14:50:00	0.133378	0.125841
					18:50:00	0.0631806	0.171061						15:00:00	0.186679	0.156348
					19:00:00	0.085836	0.0145487						15:10:00	0.221466	0.50757
					19:10:00	0.111963	0.137701						15:20:00	0.338573	0.375217
					19:20:00	0.0228572	0.265691						15:30:00	0.300737	0.399557
					19:30:00	0.160936	0.206215						15:40:00	0.213685	0.0763436
					19:40:00	0.154806	0.129969						15:50:00	0.245809	0.343876
					19:50:00	0.0452003	0.308495						16:00:00	0.101992	0.10634
					20:00:00	0.0921377	0.142669						16:10:00	0.226491	0.185174
					20:10:00	0.0400337	0.0862315						16:20:00	0.16367	0.174539
					20:20:00	0.173805	0.153076						16:30:00	0.349159	0.490841
					20:30:00	0.245162	0.0296587						16:40:00	0.382291	0.27244
					20:40:00	0.176237	0.131895						16:50:00	0.230692	0.215831
					20:50:00	0.192303	0.0294956						17:00:00	0.0874504	0.344522
					21:00:00	0.202486	0.205175						17:10:00	0.0957712	0.394009
					21:10:00	0.121742	0.0787174						17:20:00	0.126983	0.360449
					21:20:00	0.0782128	0.0431134						17:30:00	0.0547702	0.315681
					21:30:00	0.17344	0.310607						17:40:00	0.31637	0.109891
					21:40:00	0.106988	0.242888						17:50:00	0.494724	0.177566
					21:50:00	0.130212	0.228583						18:00:00	0.177302	0.19785
					22:00:00	0.0716163	0.116689						18:10:00	0.211633	0.314852
					22:10:00	0.0486152	0.298403						18:20:00	0.106886	0.167853
					22:20:00	0.220625	0.140318						18:30:00	0.17692	0.246358
					22:30:00	0.0616604	0.391797						18:40:00	0.14691	0.092662
					22:40:00	0.0798403	0.164676						18:50:00	0.0945338	0.127701
					22:50:00	0.0397841	0.16995						19:00:00	0.145465	0.32043
					23:00:00	0.0937125	0.0842622						19:10:00	0.120085	0.22766
					23:10:00	0.141534	0.126318						19:20:00	0.0627072	0.210321
					23:20:00	0.208884	0.213501						19:30:00	0.186109	0.107019
					23:30:00	0.16504	0.317587						19:40:00	0.243475	0.422626
					23:40:00	0.10797	0.187969						19:50:00	0.0185242	0.139085
					23:50:00	0.122298	0.381535						20:00:00	0.197271	0.140767
					24:00	0.183139	0.129765						20:10:00	0.310236	0.265831
					Average	0.142938	0.211153						20:20:00	0.101539	0.214963
					p-value	1.8279e-06							20:30:00	0.274054	0.31021
													20:40:00	0.306449	0.191962
													20:50:00	0.15851	0.393892
													21:00:00	0.142153	0.274011
													21:10:00	0.251527	0.482275
													21:20:00	0.0571409	0.114757
													21:30:00	0.422188	0.418825
													21:40:00	0.30473	0.457101
													21:50:00	0.172011	0.368035
													22:00:00	0.30249	0.261185
													22:10:00	0.132439	0.346999
													22:20:00	0.149215	0.266908
													22:30:00	0.299771	0.206111
													22:40:00	0.123358	0.175913
													22:50:00	0.240452	0.118366
													23:00:00	0.237048	0.156528
													23:10:00	0.118759	0.36319
													23:20:00	0.186182	0.167952
													23:30:00	0.459658	0.44972
													23:40:00	0.180629	0.152583
													23:50:00	0.151256	0.216904
													24:00	0.103382	0.382272
													Average	0.206212	0.285158
													p-value	4.74731e-06
