# Supplementary material for: Live imaging of hair bundle polarity acquisition demonstrates a critical timeline for transcription factor Emx2
Source: eLife. 2020 Sep 23;9:e59282. doi: 10.7554/eLife.59282 (PMC7535933; doi:10.7554/eLife.59282)
Supplement: Figure 2—figure supplement 2—source data 2. [file elife-59282-fig2-figsupp2-data2.xlsx]

## Sheet: Sheet1
	Figure 2--figure supplement 2--source data 2
	The x-y distance between centrioles in Md HC1 and Md HC2 during centriole migration.
	Md HC1 (Phase I)			Md HC1 (phase II)				Md HC2 (Phase I)			Md HC2 (Phase II)
	Time (hr:min)	Phase I x-y Distance between centrioles (μm)		Time (hr:min)	Phase II x-y Distance between centrioles (μm)			Time (hr:min)	Phase I x-y Distance between centrioles (μm)		Time (hr:min)	Phase II x-y Distance between centrioles (μm)
	00:00:00	0.388135		08:50:00	0.492721			00:00:00	0.912896		05:00:00	0.754043
	00:10:00	0.200355		09:00:00	0.569623			00:10:00	0.842615		05:10:00	0.514391
	00:20:00	0.547875		09:10:00	0.46451			00:20:00	0.827553		05:20:00	0.745744
	00:30:00	0.148895		09:20:00	0.398265			00:30:00	0.761219		05:30:00	1.09262
	00:40:00	0.483698		09:30:00	0.59976			00:40:00	0.626198		05:40:00	0.883254
	00:50:00	0.145806		09:40:00	0.727037			00:50:00	0.528799		05:50:00	0.644295
	01:00:00	0.225463		09:50:00	0.86189			01:00:00	0.62091		06:00:00	0.692734
	01:10:00	0.291339		10:00:00	0.687948			01:10:00	0.478374		06:10:00	0.835018
	01:20:00	0.164009		10:10:00	0.815535			01:20:00	0.49836		06:20:00	0.345587
	01:30:00	0.3655		10:20:00	0.801012			01:30:00	0.318386		06:30:00	0.46248
	01:40:00	0.28223		10:30:00	0.87122			01:40:00	0.395973		06:40:00	0.451302
	01:50:00	0.232304		10:40:00	0.965734			01:50:00	0.724502		06:50:00	0.806857
	02:00:00	0.293584		10:50:00	0.934556			02:00:00	0.589713		07:00:00	0.62519
	02:10:00	0.361095		11:00:00	0.905437			02:10:00	0.4763		07:10:00	0.422149
	02:20:00	0.520673		11:10:00	0.973973			02:20:00	0.462422		07:20:00	0.559127
	02:30:00	0.0723923		11:20:00	0.921455			02:30:00	0.220957		07:30:00	0.577849
	02:40:00	0.393		11:30:00	0.743102			02:40:00	0.128173		07:40:00	0.616652
	02:50:00	0.287321		11:40:00	0.8879			02:50:00	0.215911		07:50:00	0.531914
	03:00:00	0.419583		11:50:00	0.719005			03:00:00	0.387902		08:00:00	0.695889
	03:10:00	0.452565		12:00:00	0.970617			03:10:00	0.165849		08:10:00	0.433419
	03:20:00	0.816161		12:10:00	1.05481			03:20:00	0.240325		08:20:00	0.450359
	03:30:00	0.607855		12:20:00	0.724715			03:30:00	0.2485		08:30:00	0.574669
	03:40:00	0.563357		12:30:00	0.883451			03:40:00	0.339128		08:40:00	0.676307
	03:50:00	0.956668		12:40:00	1.09087			03:50:00	0.255669		08:50:00	0.662237
	04:00:00	0.830299		12:50:00	1.02068			04:00:00	0.352675		09:00:00	0.676072
	04:10:00	1.24648		13:00:00	1.16898			04:10:00	0.852055		09:10:00	0.91888
	04:20:00	0.524759		13:10:00	1.14771			04:20:00	0.825828		09:20:00	0.545745
	04:30:00	1.33607		13:20:00	1.15283			04:30:00	0.606993		09:30:00	0.586803
	04:40:00	0.0697378		13:30:00	1.20977			04:40:00	0.569812		09:40:00	0.707901
	04:50:00	0.120822		13:40:00	1.18116			04:50:00	0.639824		09:50:00	0.536383
	05:00:00	0.80051		13:50:00	1.17859			Average	0.503794		10:00:00	0.851265
	05:10:00	0.857769		14:00:00	1.1848						10:10:00	0.809854
	05:20:00	1.40506		14:10:00	0.88063						10:20:00	0.755843
	05:30:00	1.45528		14:20:00	1.00473						10:30:00	1.06938
	05:40:00	0.521611		14:30:00	1.01885						10:40:00	0.542672
	05:50:00	0.183061		14:40:00	1.09365						10:50:00	0.923906
	06:00:00	0.125327		14:50:00	0.942252						11:00:00	0.707795
	06:10:00	0.451329		15:00:00	0.779995						11:10:00	0.895629
	06:20:00	0.326786		15:10:00	1.11469						11:20:00	0.827219
	06:30:00	0.589883		15:20:00	1.11976						11:30:00	1.23382
	06:40:00	0.476809		15:30:00	1.13504						11:40:00	1.11376
	06:50:00	0.613895		15:40:00	1.08944						11:50:00	1.24756
	07:00:00	0.621645		15:50:00	1.02321						12:00:00	1.22866
	07:10:00	0.341693		16:00:00	0.975021						12:10:00	1.28511
	07:20:00	0.0512606		16:10:00	0.654763						12:20:00	1.02739
	07:30:00	0.156134		16:20:00	0.705299						12:30:00	0.956075
	07:40:00	0.292157		16:30:00	0.606103						12:40:00	0.818382
	07:50:00	0.158524		16:40:00	0.775646						12:50:00	0.813267
	08:00:00	0.389449		16:50:00	0.931259						13:00:00	0.959673
	08:10:00	0.54027		17:00:00	0.922656						13:10:00	0.699727
	08:20:00	0.21131		17:10:00	0.953444						13:20:00	0.682551
	08:30:00	0.210985		17:20:00	0.808111						13:30:00	0.755385
	08:40:00	0.307476		17:30:00	1.09925						13:40:00	0.522428
	Average	0.461061		17:40:00	0.947374						13:50:00	0.650618
				17:50:00	0.660342						14:00:00	0.507113
				18:00:00	0.868742						14:10:00	0.886486
				18:10:00	0.856676						14:20:00	0.730649
				18:20:00	0.777372						14:30:00	0.660297
				18:30:00	1.04938						14:40:00	0.56583
				18:40:00	0.937233						14:50:00	0.823292
				18:50:00	0.792718						15:00:00	0.646774
				19:00:00	0.79809						15:10:00	0.931946
				19:10:00	0.826304						15:20:00	0.568398
				19:20:00	0.604925						15:30:00	0.555788
				19:30:00	0.762062						15:40:00	0.678125
				19:40:00	0.775694						15:50:00	0.577053
				19:50:00	0.824862						16:00:00	0.511376
				20:00:00	0.793858						16:10:00	0.547636
				20:10:00	0.767252						16:20:00	0.30453
				20:20:00	0.574915						16:30:00	0.379227
				20:30:00	0.583908						16:40:00	0.552079
				20:40:00	0.632495						16:50:00	0.560624
				20:50:00	0.650675						17:00:00	0.358816
				21:00:00	0.773371						17:10:00	0.533718
				21:10:00	0.62521						17:20:00	0.354047
				21:20:00	0.737544						17:30:00	0.546623
				21:30:00	0.775452						17:40:00	0.334044
				21:40:00	0.863124						17:50:00	0.635474
				21:50:00	0.759927						18:00:00	0.53563
				22:00:00	0.778576						18:10:00	0.617376
				22:10:00	0.76721						18:20:00	0.570373
				22:20:00	0.799961						18:30:00	0.707686
				22:30:00	0.670164						18:40:00	0.774732
				22:40:00	0.718008						18:50:00	0.680794
				22:50:00	0.858942						19:00:00	0.973413
				23:00:00	0.729009						19:10:00	0.750504
				23:10:00	0.732141						19:20:00	0.604551
				23:20:00	0.722762						19:30:00	0.774473
				23:30:00	0.657016						19:40:00	0.934094
				23:40:00	0.691842						19:50:00	1.03958
				23:50:00	0.312558						20:00:00	1.05749
				24:00	0.570351						20:10:00	0.868348
				Average	0.836647						20:20:00	0.752133
				p-value	1.86397e-10						20:30:00	0.69429
											20:40:00	0.892789
											20:50:00	0.894387
											21:00:00	0.725076
											21:10:00	0.755619
											21:20:00	0.586721
											21:30:00	0.539565
											21:40:00	0.954651
											21:50:00	0.660386
											22:00:00	0.619387
											22:10:00	0.445123
											22:20:00	0.590696
											22:30:00	0.92475
											22:40:00	0.888989
											22:50:00	0.796794
											23:00:00	0.943143
											23:10:00	0.908309
											23:20:00	0.841218
											23:30:00	1.12955
											23:40:00	1.14115
											23:50:00	1.02446
											24:00	0.722953
											Average	0.725869
											p-value	2.01896e-05
