# Supplementary material for: Live imaging of hair bundle polarity acquisition demonstrates a critical timeline for transcription factor Emx2
Source: eLife. 2020 Sep 23;9:e59282. doi: 10.7554/eLife.59282 (PMC7535933; doi:10.7554/eLife.59282)
Supplement: Figure 2—figure supplement 2—source data 3. [file elife-59282-fig2-figsupp2-data3.xlsx]

## Sheet: Sheet1
	Figure 2--figure supplement 2--source data 4
	The z-distance between centrioles in Md HC1 and Md HC2 during centriole migration.
	Md HC1 (Phase I)			Md HC1 (Phase II)				Md HC2 (Phase I)			Md HC2 (Phase II)
	Time (hr:min)	Phase I z-Distance between centrioles (μm)		Time (hr:min)	Phase II z-Distance between centrioles (μm)			Time (hr:min)	Phase I z-Distance between centrioles (μm)		Time (hr:min)	Phase II z-Distance between centrioles (μm)
	00:00:00	1.88266		08:50:00	1.2373			00:00:00	0.91395		05:00:00	1.50571
	00:10:00	0.97688		09:00:00	1.31572			00:10:00	1.02057		05:10:00	1.37207
	00:20:00	1.38761		09:10:00	1.17334			00:20:00	0.89325		05:20:00	1.49419
	00:30:00	1.20301		09:20:00	1.34661			00:30:00	0.82416		05:30:00	1.53321
	00:40:00	1.88429		09:30:00	1.13338			00:40:00	0.96635		05:40:00	1.17989
	00:50:00	1.36383		09:40:00	1.01448			00:50:00	1.21574		05:50:00	1.09846
	01:00:00	1.21741		09:50:00	0.66914			01:00:00	1.15242		06:00:00	1.48708
	01:10:00	1.71437		10:00:00	0.82256			01:10:00	1.4768		06:10:00	1.27518
	01:20:00	1.69364		10:10:00	0.8354			01:20:00	1.50631		06:20:00	1.26033
	01:30:00	1.41752		10:20:00	0.5003			01:30:00	1.35297		06:30:00	1.23172
	01:40:00	0.96041		10:30:00	0.61973			01:40:00	1.47498		06:40:00	1.35209
	01:50:00	0.93812		10:40:00	0.51471			01:50:00	1.11584		06:50:00	1.0705
	02:00:00	0.89034		10:50:00	0.81452			02:00:00	1.28723		07:00:00	1.21831
	02:10:00	0.84176		11:00:00	0.89189			02:10:00	1.35328		07:10:00	1.46095
	02:20:00	0.82343		11:10:00	0.88479			02:20:00	2.16667		07:20:00	1.23323
	02:30:00	0.64028		11:20:00	0.50143			02:30:00	1.36651		07:30:00	1.33268
	02:40:00	0.70714		11:30:00	0.64095			02:40:00	1.36861		07:40:00	1.29895
	02:50:00	0.83308		11:40:00	0.46231			02:50:00	1.37532		07:50:00	1.24216
	03:00:00	1.10222		11:50:00	0.59827			03:00:00	1.73999		08:00:00	1.32111
	03:10:00	1.20466		12:00:00	0.4439			03:10:00	1.39765		08:10:00	0.8875
	03:20:00	1.47016		12:10:00	0.43095			03:20:00	1.57588		08:20:00	1.24494
	03:30:00	1.5105		12:20:00	0.84701			03:30:00	1.35471		08:30:00	1.16691
	03:40:00	1.92561		12:30:00	0.74135			03:40:00	1.53419		08:40:00	1.47863
	03:50:00	3.49242		12:40:00	0.6699			03:50:00	1.42077		08:50:00	1.22387
	04:00:00	3.6941		12:50:00	0.43887			04:00:00	1.58239		09:00:00	1.10095
	04:10:00	2.74599		13:00:00	0.19462			04:10:00	1.56988		09:10:00	1.42148
	04:20:00	3.97944		13:10:00	0.44883			04:20:00	1.4966		09:20:00	1.07903
	04:30:00	5.01825		13:20:00	0.40672			04:30:00	1.44885		09:30:00	1.3365
	04:40:00	0.76501		13:30:00	0.334			04:40:00	1.66281		09:40:00	1.27616
	04:50:00	0.70189		13:40:00	0.34666			04:50:00	1.3874		09:50:00	1.36108
	05:00:00	4.12077		13:50:00	0.45718			Average	1.36674		10:00:00	1.15812
	05:10:00	4.13614		14:00:00	0.95003						10:10:00	1.19715
	05:20:00	3.90881		14:10:00	0.30463						10:20:00	1.28851
	05:30:00	4.75256		14:20:00	0.89128						10:30:00	1.22369
	05:40:00	2.26627		14:30:00	0.47107						10:40:00	1.18639
	05:50:00	0.99159		14:40:00	0.67887						10:50:00	1.39275
	06:00:00	0.9947		14:50:00	0.67186						11:00:00	1.16409
	06:10:00	1.34107		15:00:00	0.57909						11:10:00	1.31008
	06:20:00	1.41813		15:10:00	0.72155						11:20:00	1.49463
	06:30:00	0.9985		15:20:00	0.83749						11:30:00	1.11326
	06:40:00	1.07175		15:30:00	0.68997						11:40:00	1.1234
	06:50:00	1.05677		15:40:00	0.66183						11:50:00	1.38534
	07:00:00	0.75145		15:50:00	0.91577						12:00:00	1.18701
	07:10:00	0.84314		16:00:00	0.69547						12:10:00	1.4226
	07:20:00	0.70418		16:10:00	1.10894						12:20:00	1.33266
	07:30:00	0.66133		16:20:00	1.24998						12:30:00	1.03792
	07:40:00	0.65548		16:30:00	1.17732						12:40:00	1.02648
	07:50:00	0.75564		16:40:00	1.4367						12:50:00	0.99533
	08:00:00	1.33652		16:50:00	1.17876						13:00:00	1.12744
	08:10:00	1.43823		17:00:00	0.97633						13:10:00	1.06892
	08:20:00	1.51894		17:10:00	0.7755						13:20:00	1.21657
	08:30:00	0.97421		17:20:00	0.68271						13:30:00	1.20694
	08:40:00	1.65163		17:30:00	0.60279						13:40:00	1.05097
	Average	1.64781		17:40:00	0.91921						13:50:00	1.50234
				17:50:00	0.90168						14:00:00	1.27389
				18:00:00	0.63769						14:10:00	0.9191
				18:10:00	0.63434						14:20:00	1.01765
				18:20:00	0.84724						14:30:00	0.98051
				18:30:00	1.09992						14:40:00	1.11501
				18:40:00	0.90172						14:50:00	1.32205
				18:50:00	1.04704						15:00:00	1.10656
				19:00:00	0.85719						15:10:00	0.74537
				19:10:00	0.98569						15:20:00	0.89087
				19:20:00	1.29736						15:30:00	0.97765
				19:30:00	0.98187						15:40:00	0.96762
				19:40:00	0.96879						15:50:00	0.89368
				19:50:00	1.07652						16:00:00	1.0292
				20:00:00	1.03187						16:10:00	0.98105
				20:10:00	0.90167						16:20:00	1.08441
				20:20:00	1.30613						16:30:00	1.02103
				20:30:00	1.50171						16:40:00	1.29567
				20:40:00	1.18387						16:50:00	0.96224
				20:50:00	1.10266						17:00:00	0.52214
				21:00:00	1.17131						17:10:00	0.7969
				21:10:00	0.9968						17:20:00	0.8423
				21:20:00	0.55267						17:30:00	1.17645
				21:30:00	0.91024						17:40:00	0.92356
				21:40:00	1.10211						17:50:00	1.31627
				21:50:00	0.90102						18:00:00	1.40821
				22:00:00	0.94623						18:10:00	0.93783
				22:10:00	0.90413						18:20:00	1.05738
				22:20:00	0.82323						18:30:00	1.36692
				22:30:00	0.79053						18:40:00	0.89411
				22:40:00	0.83772						18:50:00	0.9243
				22:50:00	0.91511						19:00:00	1.0577
				23:00:00	0.83379						19:10:00	0.92268
				23:10:00	1.00437						19:20:00	0.9889
				23:20:00	0.82829						19:30:00	0.82144
				23:30:00	1.06278						19:40:00	0.71917
				23:40:00	1.08331						19:50:00	0.84745
				23:50:00	0.99996						20:00:00	0.61745
				24:00	0.95406						20:10:00	0.94571
				Average	0.845615						20:20:00	0.86481
				p-value	6.98304e-06						20:30:00	0.74616
											20:40:00	0.4947
											20:50:00	0.51831
											21:00:00	0.70194
											21:10:00	0.99118
											21:20:00	0.77866
											21:30:00	1.00516
											21:40:00	0.6805
											21:50:00	1.10166
											22:00:00	1.23322
											22:10:00	1.0777
											22:20:00	1.17
											22:30:00	1.06452
											22:40:00	0.64969
											22:50:00	0.66822
											23:00:00	0.74831
											23:10:00	0.48585
											23:20:00	0.88046
											23:30:00	0.96794
											23:40:00	0.98261
											23:50:00	0.75189
											24:00	1.06288
											Average	1.08743
											p-value	1.02588e-05
