# Supplementary material for: Live imaging of hair bundle polarity acquisition demonstrates a critical timeline for transcription factor Emx2
Source: eLife. 2020 Sep 23;9:e59282. doi: 10.7554/eLife.59282 (PMC7535933; doi:10.7554/eLife.59282)
Supplement: Figure 2—figure supplement 3—source data 1. [file elife-59282-fig2-figsupp3-data1.xlsx]

## Sheet: Sheet1
	Figure 2--figure supplement 3--source data 1
	Coordinates of centriole positions relative to the center of the HC or the MC in Lat HC2.
	Lat HC2
	Time (hr:min)	Phase	DC-X relative to the MC-X (μm)	DC-Y relative to the MC-Y (μm)	MC-X relative to the center of the cell (μm)	MC-Y relative to the center of the cell (μm)	DC-X relative to the center of the cell (μm)	DC-Y relative to the center of the cell (μm)
	09:40:00	I	-0.525398	-0.183399	-	-	-	-
	09:50:00	I	-0.3596	-0.5436	-	-	-	-
	10:00:00	I	0.00579834	-0.384701	-	-	-	-
	10:10:00	I	-0.497898	-0.330399	-	-	-	-
	10:20:00	I	-0.0112991	-0.1182	-	-	-	-
	10:30:00	I	0.0265007	-0.1464	-	-	-	-
	10:40:00	I	-0.150101	-0.436499	-	-	-	-
	10:50:00	I	0.343601	-0.341702	-	-	-	-
	11:00:00	I	0.5961	-0.401901	-	-	-	-
	11:10:00	I	0.828999	0.0522995	-	-	-	-
	11:20:00	I	0.714302	0.0586014	-	-	-	-
	11:30:00	I	0.728203	-0.116001	-	-	-	-
	11:40:00	I	0.743202	-0.0573997	-	-	-	-
	11:50:00	I	0.692699	-0.229	-	-	-	-
	12:00:00	I	0.7192	-0.2554	-	-	-	-
	12:10:00	I	0.551201	-0.436298	-	-	-	-
	12:20:00	I	0.577	-0.345499	-	-	-	-
	12:30:00	I	0.506302	-0.435001	-	-	-	-
	12:40:00	I	0.138	-0.0890007	-	-	-	-
	12:50:00	I	0.4799	-0.1196	-	-	-	-
	13:00:00	I	0.142803	-0.0380001	-	-	-	-
	13:10:00	I	0.175701	-0.438	-	-	-	-
	13:20:00	I	0.27	-0.0935993	-	-	-	-
	13:30:00	I	0.220802	-0.111401	-	-	-	-
	13:40:00	I	0.0774002	0.0503006	-	-	-	-
	13:50:00	I	0.0101013	0.132099	-	-	-	-
	14:00:00	I	0.319	0.4683	-	-	-	-
	14:10:00	I	0.00550079	0.0419006	-	-	-	-
	14:20:00	I	-0.197498	0.0985985	-	-	-	-
	14:30:00	I	0.0937004	0.0484009	-	-	-	-
	14:40:00	I	0.432003	0.0382996	-	-	-	-
	14:50:00	I	0.5215	0.382299	-	-	-	-
	15:00:00	I	0.769901	0.7225	-	-	-	-
	15:10:00	I	0.178501	0.790899	-	-	-	-
	15:20:00	I	0.625401	0.718102	-	-	-	-
	15:30:00	I	0.284901	0.653	-	-	-	-
	15:40:00	I	0.528099	0.566999	-	-	-	-
	15:50:00	I	0.613003	0.540699	-	-	-	-
	16:00:00	I	0.448002	0.4639	-	-	-	-
	16:10:00	I	0.683201	0.3267	-	-	-	-
	16:20:00	I	0.722202	0.339199	-	-	-	-
	16:30:00	I	0.536102	0.3001	-	-	-	-
	16:40:00	I	-	-	-0.256802	0.0156002	0.439899	0.282101
	16:50:00	I	-	-	-0.228199	0.2495	0.124802	0.5305
	17:00:00	I	-	-	-0.160603	0.1908	0.380699	0.333799
	17:10:00	I	-	-	-0.414997	0.121601	-0.197197	0.0560017
	17:20:00	I	-	-	-0.218098	0.180901	0.190701	-0.0678997
	17:30:00	I	-	-	0.00170135	0.2125	0.230499	0.183399
	17:40:00	I	-	-	0.0891991	0.150101	0.0178986	0.1901
	17:50:00	I	-	-	-0.266899	0.379601	0.153999	0.3934
	18:00:00	I	-	-	0.180801	0.101599	0.291401	0.1537
	18:10:00	I	-	-	0.6049	-0.0603008	0.5116	0.323999
	18:20:00	I	-	-	0.494202	-0.0362015	0.0848999	0.300798
	18:30:00	I	-	-	0.294903	-0.00320053	0.0600014	0.0654984
	18:40:00	I	-	-	0.247398	0.1206	0.243	0.116499
	18:50:00	I	-	-	0.2407	0.0352993	0.525902	0.1008
	19:00:00	I	-	-	0.352898	0.0585003	0.114998	0.190001
	19:10:00	I	-	-	0.285198	0.2264	0.248798	0.245199
	19:20:00	I	-	-	0.246799	0.1558	0.254799	0.369101
	19:30:00	I	-	-	0.350101	-0.0573006	0.242901	0.457998
	19:40:00	I	-	-	0.262096	0.0596008	0.0953979	0.4195
	19:50:00	I	-	-	0.199497	-0.0445995	0.0299988	0.2402
	20:00:00	I	-	-	-0.0199013	0.2519	0.108299	0.372499
	20:10:00	I	-	-	0.0622978	0.281	0.300297	0.338501
	20:20:00	I	-	-	0.0638008	0.274799	0.510502	0.4084
	20:30:00	I	-	-	0	0.2742	0.189198	0.3978
	20:40:00	I	-	-	-0.0514984	0.3076	0.4771	0.5287
	20:50:00	I	-	-	0.2444	0.3393	0.510597	0.375
	21:00:00	I	-	-	0.351898	0.5613	0.318398	0.632299
	21:10:00	I	-	-	0.0877991	0.610699	0.525898	0.5735
	21:20:00	I	-	-	0.0203018	0.387999	0.438301	0.434099
	21:30:00	I	-	-	-0.504299	0.209002	-0.444	0.0440006
	21:40:00	I	-	-	-0.0964012	0.303301	0.438499	0.467602
	21:50:00	I	-	-	0.00240326	0.1243	0.376202	0.110201
	22:00:00	I	-	-	0.311798	0.329401	0.511101	0.176201
	22:10:00	II	-	-	0.356899	0.325701	0.389599	0.4231
	22:20:00	II	-	-	0.178898	0.1572	0.452099	0.6071
	22:30:00	II	-	-	0.0692978	0.0834999	0.287399	0.4988
	22:40:00	II	-	-	0.161201	0.3606	0.3978	0.6478
	22:50:00	II	-	-	-0.0303993	0.166901	0.129902	0.7941
	23:00:00	II	-	-	0.226299	0.1262	0.359699	0.692999
	23:10:00	II	-	-	0.305199	0.1371	0.681599	0.6373
	23:20:00	II	-	-	0.241398	0.258801	0.737	0.441799
	23:30:00	II	-	-	0.0621033	0.0547009	0.676502	0.445801
	23:40:00	II	-	-	0.1455	0.0272007	0.698601	0.439701
	23:50:00	II	-	-	-0.0159988	-0.0650005	0.443001	0.375999
	24:00	II	-	-	0.1357	-0.0744991	0.510399	0.3311
	24:10	II	-	-	0.291798	-0.174101	0.534199	0.3859
	24:20	II	-	-	0.5784	0.0921001	0.590599	0.309299
	24:30	II	-	-	0.533501	-0.00220108	0.5341	0.2521
	24:40	II	-	-	0.441998	-0.0259991	0.388599	0.3594
	24:50	II	-	-	0.541	0.0219994	0.500198	0.678699
	25:00	II	-	-	0.526203	0.1092	0.541702	0.8057
	25:10	II	-	-	0.5606	0.233301	0.571098	0.778101
	25:20	II	-	-	0.785801	-0.0711994	0.5448	0.5886
	25:30	II	-	-	0.2967	-0.176701	0.4165	0.6584
	25:40	II	-	-	0.582897	-0.149799	0.604397	0.6912
	25:50	II	-	-	0.5336	0.0636997	0.352798	0.6793
	26:00	II	-	-	0.422703	0.0171986	0.140301	0.6534
	26:10	II	-	-	0.499199	0.0981007	0.201698	0.8239
	26:20	II	-	-	0.471699	-0.139	0.217297	0.691299
	26:30	II	-	-	0.226303	0.138599	0.265102	0.767099
	26:40	II	-	-	0.356499	0.0240002	0.260601	0.692902
	26:50	II	-	-	0.399498	0.0515995	0.174	0.709101
	27:00	II	-	-	0.311001	0.1833	0.4818	0.856201
	27:10	II	-	-	0.482201	0.174999	0.496601	0.7621
	27:20	II	-	-	0.4165	0.2768	0.3745	0.5828
	27:30	II	-	-	0.532997	0.266401	0.400097	0.423901
	27:40	II	-	-	0.607399	0.331299	0.587902	0.837599
	27:50	II	-	-	0.350399	0.285101	0.172897	0.6119
	28:00	II	-	-	0.437302	0.0354004	0.216801	0.4631
	28:10	II	-	-	0.404301	0.0297012	0.293201	0.540901
	28:20	II	-	-	0.374203	0.2799	0.3764	0.700399
	28:30	II	-	-	0.575397	0.141201	0.337299	0.6329
	28:40	II	-	-	0.528801	0.1045	0.366699	0.8251
	28:50	II	-	-	0.375202	0.139599	0.165699	0.7687
	29:00	II	-	-	0.432701	-0.152199	0.3097	0.412901
	29:10	II	-	-	0.514599	0.0410995	0.5509	0.764299
	29:20	II	-	-	0.635002	0.0572987	0.431301	0.762199
	29:30	II	-	-	0.709	0.0389004	0.529701	0.6978
	29:40	II	-	-	0.791401	0.2038	0.868801	0.836601
	29:50	II	-	-	0.950199	0.242899	0.854599	0.5702
	30:00	II	-	-	0.6376	0.112999	0.451401	0.7883
	30:10	II	-	-	0.256302	0.524101	0.168102	1.1102
	30:20	II	-	-	0.492199	0.513901	0.920601	1.203
	30:30	II	-	-	0.617599	0.6245	1.0825	1.2052
	30:40	II	-	-	0.4981	0.2397	0.801598	0.9788
	30:50	II	-	-	0.5583	0.363001	0.810902	1.0088
	31:00	II	-	-	0.460701	0.289101	0.891399	0.980801
	31:10	II	-	-	0.443401	0.2005	0.869999	0.8571
	31:20	II	-	-	0.240902	0.124401	0.470501	0.872601
	31:30	II	-	-	0.4184	0.0446987	0.482399	0.721399
	31:40	II	-	-	0.705299	0.2423	0.364597	0.7528
	31:50	II	-	-	0.6446	-0.0252991	0.584103	0.768
	32:00	II	-	-	0.656898	0.1462	0.621799	0.7999
	32:10	II	-	-	0.581402	0.0563011	0.454399	0.683201
	32:20	II	-	-	0.5172	0.0705986	0.407001	0.7227
	32:30	II	-	-	0.404701	0.1663	0.472099	0.8465
	32:40	II	-	-	0.595501	0.126299	0.628799	0.7561
	32:50	II	-	-	0.3834	0.1229	0.462601	0.8717
	33:00	II	-	-	0.276501	0.0200005	0.670101	0.6605
	33:10	II	-	-	0.420399	-0.187401	0.815899	0.5121
	33:20	II	-	-	0.318298	-0.2665	0.605301	0.530399
	33:30	II	-	-	0.313297	-0.111101	0.679199	0.572199
	33:40	II	-	-	0.344101	-0.216	0.816399	0.448002
	33:50	II	-	-	0.387798	-0.249401	0.670799	0.405899
	34:00	II	-	-	0.442398	-0.371	0.7435	0.4443
	34:10	II	-	-	0.566101	-0.300699	0.6007	0.510601
	34:20	II	-	-	0.513699	-0.2101	0.657997	0.5623
	34:30	II	-	-	0.467602	-0.350498	0.6199	0.5084
	34:40	II	-	-	0.630402	-0.206999	0.648602	0.628101
	34:50	II	-	-	0.477699	-0.0948009	0.937401	0.5376
	35:00	II	-	-	0.571602	-0.1395	1.114	0.374599
	35:10	II	-	-	0.360901	-0.2959	0.8643	0.3256
	35:20	II	-	-	0.361103	-0.274099	0.8479	0.403502
	35:30	II	-	-	0.421703	-0.701	1.1437	-0.2155
	35:40	II	-	-	0.513199	-0.631399	1.0312	0.0697994
	35:50	II	-	-	0.519199	-0.7055	1.1049	0.130001
	36:00	II	-	-	0.836002	-0.3629	1.2779	0.4846
	36:10	II	-	-	0.543301	-0.382401	1.1889	0.1985
	36:20	II	-	-	0.435398	-0.3871	0.971897	0.296801
	36:30	II	-	-	0.6623	-0.4366	1.0165	0.341
	36:40	II	-	-	0.5994	-0.330101	0.8493	0.556601
	36:50	II	-	-	0.4809	-0.379099	0.9599	0.4729
	37:00	II	-	-	0.405697	-0.538	0.768097	0.486
	37:10	II	-	-	0.652199	-0.681801	0.9422	0.196501
	37:20	II	-	-	0.682602	-0.7747	0.565201	0.3109
	37:30	II	-	-	0.353397	-0.6954	0.907299	-0.0328999
	37:40	II	-	-	0.110199	-0.6938	0.626499	0.0354996
	37:50	II	-	-	0.191299	-0.5501	0.6688	0.2735
	38:00	II	-	-	0.295399	-0.561399	0.742199	0.1556
	38:10	II	-	-	0.558502	-0.690102	0.803902	0.166599
	38:20	II	-	-	0.643497	-0.590099	1.2023	-0.0403004
	38:30	II	-	-	0.257801	-0.6224	0.906498	0.077301
	38:40	II	-	-	0.323803	-0.7353	0.746902	0.149801
	38:50	II	-	-	0.5201	-0.6458	0.7612	0.0389004
	39:00	II	-	-	0.473499	-0.6266	0.891399	0.0755997
	39:10	II	-	-	0.508102	-0.7199	1.001	-0.0117016
	39:20	II	-	-	0.506001	-0.805901	1.0343	-0.0804005
	39:30	II	-	-	0.227901	-0.567699	0.8741	-0.0888004
	39:40	II	-	-	0.517498	-0.4795	1.1966	-0.0578003
	39:50	II	-	-	0.6996	-0.4333	1.4261	-0.4485
	40:00	II	-	-	0.4254	-0.604898	1.2677	-0.633499
	40:10	II	-	-	0.274601	-0.6413	1.073	-0.4373
	40:20	II	-	-	0.334198	-0.720999	1.0901	-0.442099
	40:30	II	-	-	0.248199	-0.782499	0.7803	-0.214699
	40:40	II	-	-	0.140797	-0.9317	0.774899	-0.3561
	40:50	II	-	-	0.0842972	-0.9475	0.729099	-0.3134
