# Supplementary material for: Live imaging of hair bundle polarity acquisition demonstrates a critical timeline for transcription factor Emx2
Source: eLife. 2020 Sep 23;9:e59282. doi: 10.7554/eLife.59282 (PMC7535933; doi:10.7554/eLife.59282)
Supplement: Figure 2—figure supplement 3—source data 2. [file elife-59282-fig2-figsupp3-data2.xlsx]

## Sheet: Sheet1
	Figure 2--figure supplement 3--source data 2
	The x-y distance between centrioles in Lat HC1 and Lat HC2.
	Lat HC1 (Phase I)			Lat HC1 (Phase II)				Lat HC2 (Phase I)			Lat HC2 (Phase II)
	Time (hr:min)	Phase I x-y distance between centrioles (μm)		Time (hr:min)	Phase II x-y distance between centrioles (μm)			Time (hr:min)	Phase I x-y distance between centrioles (μm)		Time (hr:min)	Phase II x-y distance between centrioles (μm)
	19:20:00	0.70602		24:20	0.57966			17:10:00	0.227465		22:10:00	0.102741
	19:30:00	0.757283		24:30	0.819006			17:20:00	0.478558		22:20:00	0.526354
	19:40:00	0.598411		24:40	0.698314			17:30:00	0.230641		22:30:00	0.469087
	19:50:00	0.336466		24:50	0.532065			17:40:00	0.0817538		22:40:00	0.372107
	20:00:00	0.311615		25:00	0.455674			17:50:00	0.421125		22:50:00	0.64736
	20:10:00	0.310502		25:10	0.884627			18:00:00	0.122257		23:00:00	0.582286
	20:20:00	0.21144		25:20	0.739301			18:10:00	0.395464		23:10:00	0.626001
	20:30:00	0.621469		25:30	0.700598			18:20:00	0.530186		23:20:00	0.528308
	20:40:00	0.435398		25:40	1.20371			18:30:00	0.244741		23:30:00	0.728317
	20:50:00	0.488395		25:50	0.978256			18:40:00	0.00601349		23:40:00	0.689983
	21:00:00	0.832014		26:00	1.01274			18:50:00	0.292627		23:50:00	0.636523
	21:10:00	0.401647		26:10	1.05896			19:00:00	0.271825		24:00	0.552187
	21:20:00	0.489488		26:20	0.98789			19:10:00	0.0409676		24:10	0.610213
	21:30:00	0.278097		26:30	1.20305			19:20:00	0.213451		24:20	0.217542
	21:40:00	0.610351		26:40	0.92303			19:30:00	0.526332		24:30	0.254302
	21:50:00	0.319709		26:50	1.44489			19:40:00	0.396631		24:40	0.389081
	22:00:00	0.627527		27:00	1.0835			19:50:00	0.331422		24:50	0.657966
	22:10:00	0.258693		27:10	1.24926			20:00:00	0.17601		25:00	0.696673
	22:20:00	0.541643		27:20	1.28383			20:10:00	0.244847		25:10	0.544901
	22:30:00	0.748188		27:30	1.25397			20:20:00	0.466252		25:20	0.702436
	22:40:00	0.539458		27:40	0.962216			20:30:00	0.225993		25:30	0.843649
	22:50:00	0.963443		27:50	0.934697			20:40:00	0.572976		25:40	0.841274
	23:00:00	0.661742		28:00	0.952625			20:50:00	0.26858		25:50	0.641602
	23:10:00	0.0961558		28:10	0.74504			21:00:00	0.0785059		26:00	0.696063
	23:20:00	0.492482		28:20	0.585128			21:10:00	0.439675		26:10	0.784405
	23:30:00	0.0482361		28:30	0.788757			21:20:00	0.420534		26:20	0.868399
	23:40:00	0.445385		28:40	0.796826			21:30:00	0.175674		26:30	0.629696
	23:50:00	0.502511		28:50	0.896552			21:40:00	0.559565		26:40	0.675741
	24:00	0.489508		29:00	0.894505			21:50:00	0.374064		26:50	0.695095
	24:10	0.700668		29:10	0.644688			22:00:00	0.25138		27:00	0.694239
	Average	0.494131		29:20	0.717597			Average	0.302184		27:10	0.587278
				29:30	0.6265						27:20	0.308869
				29:40	0.543429						27:30	0.206079
				29:50	0.166666						27:40	0.506675
				30:00	0.415627						27:50	0.371893
				30:10	0.826124						28:00	0.481194
				30:20	0.703829						28:10	0.523133
				30:30	1.10829						28:20	0.420506
				30:40	0.798469						28:30	0.546314
				30:50	0.949338						28:40	0.738608
				31:00	1.07591						28:50	0.663068
				31:10	1.10372						29:00	0.578331
				31:20	1.11207						29:10	0.72411
				31:30	0.859302						29:20	0.733743
				31:40	1.0048						29:30	0.682859
				31:50	0.797439						29:40	0.637517
				32:00	1.00276						29:50	0.340977
				32:10	0.920168						30:00	0.700501
				32:20	0.980374						30:10	0.592699
				32:30	1.06402						30:20	0.811411
				32:40	1.03347						30:30	0.743872
				32:50	1.11704						30:40	0.798986
				33:00	1.05						30:50	0.693444
				33:10	0.988124						31:00	0.814831
				33:20	0.85108						31:10	0.783012
				33:30	0.84954						31:20	0.782635
				33:40	0.836866						31:30	0.67972
				33:50	0.758142						31:40	0.613749
				34:00	0.88379						31:50	0.795602
				34:10	0.746131						32:00	0.654641
				34:20	0.913262						32:10	0.639635
				34:30	0.919577						32:20	0.661347
				34:40	0.924429						32:30	0.683532
				34:50	1.14158						32:40	0.63068
				35:00	0.833367						32:50	0.752977
				35:10	0.699323						33:00	0.751772
				35:20	0.811895						33:10	0.803568
				35:30	0.863723						33:20	0.847006
				35:40	0.709797						33:30	0.775102
				35:50	1.0354						33:40	0.814839
				36:00	1.02054						33:50	0.713798
				36:10	0.95434						34:00	0.869124
				36:20	0.906896						34:10	0.812038
				36:30	0.8697						34:20	0.785763
				36:40	0.864692						34:30	0.872296
				36:50	0.661972						34:40	0.835298
				37:00	0.649428						34:50	0.781829
				37:10	0.713191						35:00	0.747326
				37:20	0.539899						35:10	0.799795
				37:30	0.667751						35:20	0.834335
				37:40	0.71736						35:30	0.870054
				37:50	0.562635						35:40	0.871783
				38:00	0.682689						35:50	1.02035
				38:10	0.724943						36:00	0.955788
				38:20	0.689202						36:10	0.868472
				38:30	0.959986						36:20	0.869225
				38:40	0.892502						36:30	0.854471
				38:50	0.738611						36:40	0.921244
				39:00	0.826737						36:50	0.977417
				39:10	0.685601						37:00	1.08624
				39:20	0.793758						37:10	0.92494
				39:30	0.982711						37:20	1.09193
				39:40	0.920795						37:30	0.863547
				39:50	0.940821						37:40	0.893557
				40:00	0.80813						37:50	0.952011
				40:10	0.878251						38:00	0.844818
				40:20	0.77967						38:10	0.891155
				40:30	0.933894						38:20	0.783924
				40:40	0.808023						38:30	0.954143
				40:50	0.909885						38:40	0.981029
				Average	0.861209						38:50	0.725909
				p-value	9.24598e-11						39:00	0.817145
											39:10	0.86284
											39:20	0.89747
											39:30	0.804311
											39:40	0.799379
											39:50	0.72666
											40:00	0.842786
											40:10	0.824051
											40:20	0.805712
											40:30	0.778157
											40:40	0.856388
											40:50	0.904352
											Average	0.716408
											p-value	1.73634e-17
