# Supplementary material for: Live imaging of hair bundle polarity acquisition demonstrates a critical timeline for transcription factor Emx2
Source: eLife. 2020 Sep 23;9:e59282. doi: 10.7554/eLife.59282 (PMC7535933; doi:10.7554/eLife.59282)
Supplement: Figure 2—figure supplement 3—source data 3. [file elife-59282-fig2-figsupp3-data3.xlsx]

## Sheet: Sheet1
	Figure 2--figure supplement 3--source data 3
	The z distance between centrioles during migration in Lat HC1 and Lat HC2 .
	Lat HC1 (Phase I)			Lat HC1 (Phase II)				Lat HC2 (Phase I)			Lat HC2 (Phase II)
	Time (hr:min)	Phase I z distance between centrioles (μm)		Time (hr:min)	Phase II z distance between centrioles (μm)			Time (hr:min)	Phase I z distance between centrioles (μm)		Time (hr:min)	Phase II z distance between centrioles (μm)
	19:20:00	1.00482		24:20	1.29965			17:10:00	0.226166		22:10:00	0.695504
	19:30:00	0.83088		24:30	1.06117			17:20:00	0.131886		22:20:00	0.847957
	19:40:00	0.88675		24:40	1.48286			17:30:00	0.342282		22:30:00	1.04354
	19:50:00	1.51255		24:50	0.844			17:40:00	0.85999		22:40:00	0.874966
	20:00:00	1.53404		25:00	0.87062			17:50:00	0.371315		22:50:00	0.99592
	20:10:00	1.57202		25:10	0.93514			18:00:00	0.525891		23:00:00	0.789207
	20:20:00	0.9848		25:20	1.27133			18:10:00	0.483753		23:10:00	0.57891
	20:30:00	1.28666		25:30	1.28515			18:20:00	0.88318		23:20:00	1.0661
	20:40:00	0.91457		25:40	1.08245			18:30:00	0.468886		23:30:00	0.82211
	20:50:00	1.08075		25:50	1.25893			18:40:00	0.88996		23:40:00	0.69409
	21:00:00	1.09861		26:00	1.08904			18:50:00	0.71209		23:50:00	0.80781
	21:10:00	0.1646		26:10	1.1455			19:00:00	1.11536		24:00	0.92498
	21:20:00	0.53191		26:20	0.69755			19:10:00	0.91711		24:10	0.765462
	21:30:00	1.44236		26:30	1.12786			19:20:00	0.78834		24:20	1.02937
	21:40:00	1.36265		26:40	0.92855			19:30:00	0.99449		24:30	0.982441
	21:50:00	0.5044		26:50	1.18478			19:40:00	1.01573		24:40	1.0269
	22:00:00	1.06983		27:00	0.83476			19:50:00	0.76809		24:50	0.60009
	22:10:00	1.04229		27:10	0.654			20:00:00	1.00725		25:00	0.55746
	22:20:00	0.99595		27:20	0.97437			20:10:00	0.95507		25:10	0.66193
	22:30:00	1.06434		27:30	1.01469			20:20:00	0.96853		25:20	0.39861
	22:40:00	1.08984		27:40	0.91228			20:30:00	0.805117		25:30	0.379968
	22:50:00	0.95645		27:50	1.01371			20:40:00	0.96477		25:40	0.48102
	23:00:00	1.34571		28:00	0.80671			20:50:00	0.854053		25:50	0.734903
	23:10:00	1.51917		28:10	0.78049			21:00:00	1.02456		26:00	0.709397
	23:20:00	1.15507		28:20	1.06582			21:10:00	0.848092		26:10	0.28504
	23:30:00	1.04302		28:30	0.72674			21:20:00	0.84473		26:20	0.52138
	23:40:00	1.26412		28:40	0.62101			21:30:00	0.677811		26:30	0.608405
	23:50:00	1.8367		28:50	0.83196			21:40:00	1.01178		26:40	0.493611
	24:00	1.49269		29:00	0.6959			21:50:00	0.823826		26:50	0.634396
	24:10	1.18927		29:10	0.85145			22:00:00	0.46103		27:00	0.42001
	Average	1.12589		29:20	0.6728			Average	0.758038		27:10	0.34961
				29:30	1.31562						27:20	0.887321
				29:40	1.3696						27:30	0.839
				29:50	0.80615						27:40	0.639569
				30:00	1.0602						27:50	1.35737
				30:10	0.86956						28:00	1.01405
				30:20	0.63595						28:10	1.41906
				30:30	0.71002						28:20	0.56786
				30:40	0.69029						28:30	0.74972
				30:50	0.81929						28:40	0.24123
				31:00	0.6217						28:50	0.62216
				31:10	0.87255						29:00	0.48897
				31:20	0.88093						29:10	0.75286
				31:30	0.91811						29:20	0.84497
				31:40	0.73921						29:30	0.17382
				31:50	1.01805						29:40	0.3135
				32:00	0.96816						29:50	0.72159
				32:10	0.93842						30:00	0.4056
				32:20	1.0637						30:10	0.56053
				32:30	0.87887						30:20	0.5034
				32:40	0.84445						30:30	0.97344
				32:50	1.02156						30:40	0.78071
				33:00	1.01083						30:50	0.76793
				33:10	0.87031						31:00	0.747085
				33:20	1.05142						31:10	0.55854
				33:30	0.881						31:20	0.959159
				33:40	0.97842						31:30	0.750998
				33:50	0.97457						31:40	0.827186
				34:00	0.7963						31:50	0.6557
				34:10	0.63409						32:00	0.777085
				34:20	0.69251						32:10	0.57362
				34:30	1.07058						32:20	0.46459
				34:40	0.68171						32:30	0.839727
				34:50	0.62819						32:40	0.49407
				35:00	0.84724						32:50	0.73616
				35:10	0.85588						33:00	0.52686
				35:20	0.85065						33:10	0.52407
				35:30	0.68438						33:20	0.72971
				35:40	1.24033						33:30	0.60152
				35:50	1.33119						33:40	0.38171
				36:00	0.85614						33:50	0.805314
				36:10	1.02489						34:00	0.40114
				36:20	0.89228						34:10	0.943438
				36:30	0.91769						34:20	0.57163
				36:40	0.74084						34:30	0.57397
				36:50	1.06708						34:40	0.62446
				37:00	1.24522						34:50	0.535495
				37:10	1.09714						35:00	0.7442
				37:20	0.96556						35:10	0.39802
				37:30	0.68526						35:20	0.539329
				37:40	0.8794						35:30	0.20103
				37:50	0.93469						35:40	0.17178
				38:00	0.83904						35:50	0.638018
				38:10	0.48738						36:00	0.303325
				38:20	0.57213						36:10	0.352991
				38:30	0.50319						36:20	0.061421
				38:40	0.53441						36:30	0.667499
				38:50	0.50884						36:40	0.64472
				39:00	0.64965						36:50	0.31062
				39:10	0.55718						37:00	0.57494
				39:20	0.29406						37:10	0.128753
				39:30	0.57601						37:20	0.102958
				39:40	0.47436						37:30	0.0667101
				39:50	0.33602						37:40	0.359202
				40:00	0.36998						37:50	0.224081
				40:10	0.57812						38:00	0.19627
				40:20	0.50436						38:10	0.887688
				40:30	0.59839						38:20	0.550999
				40:40	0.19898						38:30	0.446851
				40:50	0.29867						38:40	0.161515
				Average	0.853302						38:50	0.611398
				p-value	0.000295688						39:00	0.757408
											39:10	0.557915
											39:20	0.645797
											39:30	0.327718
											39:40	0.172422
											39:50	0.929754
											40:00	0.567463
											40:10	0.450819
											40:20	0.401427
											40:30	0.494086
											40:40	0.579619
											40:50	0.558822
											Average	0.608819
											p-value	0.00383609
