# Supplementary material for: Live imaging of hair bundle polarity acquisition demonstrates a critical timeline for transcription factor Emx2
Source: eLife. 2020 Sep 23;9:e59282. doi: 10.7554/eLife.59282 (PMC7535933; doi:10.7554/eLife.59282)
Supplement: Figure 2—figure supplement 3—source data 4. [file elife-59282-fig2-figsupp3-data4.xlsx]

## Sheet: Sheet1
	Figure 2--figure supplement 3--source data 4
	The x-y moving speeds of centrioles during migration in Lat HC1 and Lat HC2.
	Lat HC1 (Phase I)				Lat HC1 (Phase II)					Lat HC2 (Phase I)				Lat HC2 (Phase II)
	Time (hr:min)	Phase I MC x-y migration speed (μm)	Phase I DC x-y migration speed (μm)		Time (hr:min)	Phase II MC x-y migration speed (μm)	Phase II DC x-y migration speed (μm)			Time (hr:min)	Phase I MC x-y migration speed (μm)	Phase I DC x-y migration speed (μm)		Time (hr:min)	Phase II MC x-y migration speed (μm)	Phase II DC x-y migration speed (μm)
	21:10:00	0.42224	0.286682		24:30	0.0578278	0.330523			16:50:00	0.235642	0.401234		22:20:00	0.245106	0.194325
	21:20:00	0.668352	1.36656		24:40	0.151493	0.13406			17:00:00	0.0895267	0.322761		22:30:00	0.132075	0.197116
	21:30:00	0.585825	1.04952		24:50	0.29304	0.276602			17:10:00	0.263638	0.641198		22:40:00	0.291943	0.185444
	21:40:00	0.469942	0.717086		25:00	0.134444	0.226553			17:20:00	0.205635	0.407205		22:50:00	0.272452	0.305243
	21:50:00	0.650349	1.3832		25:10	0.332884	0.655157			17:30:00	0.222059	0.254431		23:00:00	0.259905	0.251054
	22:00:00	0.293193	0.596766		25:20	0.376382	0.33763			17:40:00	0.107468	0.212706		23:10:00	0.0796488	0.326683
	22:10:00	0.223977	0.88917		25:30	0.206867	0.160298			17:50:00	0.423646	0.244652		23:20:00	0.13741	0.203199
	22:20:00	0.267792	0.515934		25:40	0.153836	0.391524			18:00:00	0.526992	0.276289		23:30:00	0.271667	0.0606295
	22:30:00	0.119096	0.310208		25:50	0.0934773	0.286405			18:10:00	0.453951	0.27837		23:40:00	0.087814	0.0229249
	22:40:00	0.317522	0.542237		26:00	0.348221	0.302305			18:20:00	0.113292	0.427331		23:50:00	0.185965	0.263418
	22:50:00	0.267499	0.236494		26:10	0.0124052	0.224953			18:30:00	0.202013	0.236614		24:00	0.151996	0.0809841
	23:00:00	0.41753	0.234512		26:20	0.175428	0.162798			18:40:00	0.132602	0.189973		24:10	0.185167	0.0597451
	23:10:00	0.05176	0.600748		26:30	0.0753975	0.200355			18:50:00	0.0855631	0.283337		24:20	0.391157	0.0951247
	23:20:00	0.3105	0.687488		26:40	0.405304	0.723112			19:00:00	0.114572	0.420475		24:30	0.104444	0.0803988
	23:30:00	0.29927	0.642001		26:50	0.164125	0.655733			19:10:00	0.181035	0.144739		24:40	0.0945472	0.180786
	23:40:00	0.308745	0.695988		27:00	0.303811	0.361123			19:20:00	0.0803673	0.124047		24:50	0.110025	0.33824
	23:50:00	0.160918	0.203315		27:10	0.208878	0.24518			19:30:00	0.236819	0.0896904		25:00	0.0884467	0.133611
	24:00	0.109006	0.307938		27:20	0.0547951	0.244308			19:40:00	0.146324	0.152444		25:10	0.12878	0.0403218
	24:10	0.224102	0.286612		27:30	0.126071	0.1536			19:50:00	0.121558	0.190855		25:20	0.378729	0.191317
	Average	0.324612	0.608024		27:40	0.345329	0.159847			20:00:00	0.368846	0.153734		25:30	0.500351	0.146057
	p-value	0.00465403			27:50	0.39991	0.349946			20:10:00	0.0871982	0.194984		25:40	0.287459	0.190738
					28:00	0.319045	0.29898			20:20:00	0.00638034	0.221522		25:50	0.219117	0.25188
					28:10	0.13982	0.347511			20:30:00	0.0638036	0.321479		26:00	0.120252	0.21407
					28:20	0.285522	0.143804			20:40:00	0.0613809	0.316264		26:10	0.111341	0.181218
					28:30	0.375069	0.339831			20:50:00	0.297592	0.157308		26:20	0.23869	0.133515
					28:40	0.125848	0.0564172			21:00:00	0.246657	0.32116		26:30	0.370514	0.089616
					28:50	0.213871	0.308903			21:10:00	0.268679	0.215671		26:40	0.173447	0.0743342
					29:00	0.094455	0.164563			21:20:00	0.232704	0.164638		26:50	0.0510946	0.0881033
					29:10	0.0548867	0.424293			21:30:00	0.554298	0.964693		27:00	0.158672	0.341144
					29:20	0.163824	0.13721			21:40:00	0.418656	0.978899		27:10	0.171401	0.0952579
					29:30	0.198752	0.217831			21:50:00	0.204459	0.36279		27:20	0.121161	0.216927
					29:40	0.526011	0.389918			22:00:00	0.371203	0.150179		27:30	0.11696	0.160948
					29:50	0.223799	0.5937			Average	0.222643	0.306927		27:40	0.0987285	0.454331
					30:00	0.105797	0.165954			p-value	0.047831			27:50	0.261119	0.472407
					30:10	0.171158	0.292574							28:00	0.264391	0.155142
					30:20	0.184272	0.0766652							28:10	0.0334894	0.109041
					30:30	0.433884	0.137985							28:20	0.252002	0.179894
					30:40	0.248818	0.200953							28:30	0.24437	0.0780064
					30:50	0.226	0.0818105							28:40	0.0593145	0.194435
					31:00	0.167224	0.157664							28:50	0.157558	0.208763
					31:10	0.107835	0.387672							29:00	0.297409	0.383835
					31:20	0.26495	0.108046							29:10	0.209932	0.426214
					31:30	0.151101	0.171486							29:20	0.121488	0.119617
					31:40	0.215869	0.184159							29:30	0.0762504	0.117601
					31:50	0.258723	0.274388							29:40	0.184342	0.366408
					32:00	0.315172	0.207215							29:50	0.163541	0.26678
					32:10	0.160441	0.295433							30:00	0.338515	0.458406
					32:20	0.0921324	0.222738							30:10	0.560708	0.428811
					32:30	0.251109	0.470914							30:20	0.236118	0.758199
					32:40	0.195909	0.407969							30:30	0.167205	0.161915
					32:50	0.0056381	0.0931636							30:40	0.402928	0.360782
					33:00	0.106645	0.114189							30:50	0.137212	0.0314103
					33:10	0.0942017	0.0451515							31:00	0.122421	0.0852284
					33:20	0.0621443	0.28937							31:10	0.0902733	0.125539
					33:30	0.138263	0.0251204							31:20	0.216326	0.399799
					33:40	0.287434	0.361441							31:30	0.194571	0.151669
					33:50	0.118429	0.118253							31:40	0.348364	0.121915
					34:00	0.105158	0.166465							31:50	0.274397	0.220031
					34:10	0.0546206	0.352667							32:00	0.17194	0.0493831
					34:20	0.226942	0.457329							32:10	0.117395	0.204063
					34:30	0.229686	0.237215							32:20	0.0657741	0.0616987
					34:40	0.124411	0.32531							32:30	0.147698	0.139872
					34:50	0.286037	0.147192							32:40	0.194948	0.180907
					35:00	0.286855	0.221425							32:50	0.212128	0.202449
					35:10	0.261765	0.136675							33:00	0.148377	0.296078
					35:20	0.0703115	0.210533							33:10	0.252432	0.208037
					35:30	0.210667	0.401307							33:20	0.129156	0.211392
					35:40	0.393714	0.147915							33:30	0.15548	0.0849009
					35:50	0.330646	0.492208							33:40	0.109328	0.185064
					36:00	0.214837	0.248578							33:50	0.0550011	0.151565
					36:10	0.343739	0.273792							34:00	0.133295	0.0822191
					36:20	0.216744	0.264419							34:10	0.142284	0.157441
					36:30	0.36318	0.356797							34:20	0.104662	0.077173
					36:40	0.241164	0.314725							34:30	0.147772	0.0660045
					36:50	0.199301	0.023795							34:40	0.217016	0.123094
					37:00	0.115007	0.0673156							34:50	0.18949	0.302648
					37:10	0.214597	0.146144							35:00	0.103998	0.240327
					37:20	0.188725	0.273333							35:10	0.262404	0.254465
					37:30	0.0703951	0.190094							35:20	0.0218019	0.0796093
					37:40	0.313863	0.346961							35:30	0.431181	0.686048
					37:50	0.17545	0.0789737							35:40	0.11496	0.30668
					38:00	0.392144	0.120927							35:50	0.0743431	0.0951626
					38:10	0.0612395	0.12426							36:00	0.466625	0.39455
					38:20	0.180599	0.146798							36:10	0.293351	0.299624
					38:30	0.230381	0.219051							36:20	0.108005	0.23823
					38:40	0.138067	0.311246							36:30	0.232239	0.0627947
					38:50	0.385451	0.226052							36:40	0.123687	0.272837
					39:00	0.19782	0.28057							36:50	0.12823	0.138701
					39:10	0.292833	0.191431							37:00	0.175798	0.19225
					39:20	0.175855	0.326376							37:10	0.28538	0.337819
					39:30	0.162219	0.186871							37:20	0.0977478	0.393974
					39:40	0.0993958	0.106127							37:30	0.338621	0.485004
					39:50	0.251339	0.0642189							37:40	0.243204	0.28901
					40:00	0.249143	0.326275							37:50	0.165006	0.241731
					40:10	0.220255	0.344575							38:00	0.104711	0.138881
					40:20	0.0847096	0.0245866							38:10	0.292895	0.0626755
					40:30	0.0835495	0.119089							38:20	0.131243	0.448917
					40:40	0.0755289	0.0581549							38:30	0.387047	0.318319
					40:50	0.207867	0.0894978							38:40	0.130777	0.175291
					Average	0.204345	0.242854							38:50	0.215738	0.111819
					p-value	0.0251887								39:00	0.0504005	0.135273
														39:10	0.09951	0.14012
														39:20	0.0860261	0.0763451
														39:30	0.366168	0.160422
														39:40	0.30273	0.323985
														39:50	0.187871	0.45312
														40:00	0.323469	0.243548
														40:10	0.15513	0.276408
														40:20	0.0995172	0.0177582
														40:30	0.105726	0.3843
														40:40	0.183837	0.141504
														40:50	0.0586673	0.0626167
														Average	0.191008	0.211559
														p-value	0.169013
