# Supplementary material for: Live imaging of hair bundle polarity acquisition demonstrates a critical timeline for transcription factor Emx2
Source: eLife. 2020 Sep 23;9:e59282. doi: 10.7554/eLife.59282 (PMC7535933; doi:10.7554/eLife.59282)
Supplement: Figure 2—figure supplement 4—source data 1. [file elife-59282-fig2-figsupp4-data1.xlsx]

## Sheet: Sheet1
	Figure 2--figure supplement 4--source data 1
	Coordinates of DC positions relative to the MC in Md and Lat supporting cells.
	Md SC (supporting cell) 1					Md SC2					Lat SC1					Lat SC2
	Time (hr:min)	DC-X relative to the MC-X (μm)	DC-Y relative to the MC-Y (μm)			Time (hr:min)	DC-X relative to the MC-X (μm)	DC-Y relative to the MC-Y (μm)			Time (hr:min)	DC-X relative to the MC-X (μm)	DC-Y relative to the MC-Y (μm)			Time (hr:min)	DC-X relative to the MC-X (μm)	DC-Y relative to the MC-Y (μm)
	00:00:00	0.609999	0.0999985			00:00:00	0.315399	-0.687401			00:00:00	0.1968	-0.545002			00:00:00	-0.7153	0.1418
	00:10:00	0.0080986	-0.413898			00:10:00	0.0697002	-0.0279999			00:10:00	0.425003	-0.5364			00:10:00	-0.173801	-0.5923
	00:20:00	0.4615	-0.34			00:20:00	-0.1262	1.0276			00:20:00	0.260399	-0.632298			00:20:00	0.4489	-0.218401
	00:30:00	-0.231699	0.212799			00:30:00	-0.657801	0.596899			00:30:00	0.334698	-0.427898			00:30:00	0.3239	-0.605101
	00:40:00	0.297499	0.437202			00:40:00	-0.662998	0.247301			00:40:00	0.460403	-0.397697			00:40:00	0.6036	-0.0904007
	00:50:00	0.285299	0.611401			00:50:00	0.0419006	-0.680101			00:50:00	0.0270004	-0.779503			00:50:00	0.560699	0.354502
	01:00:00	-0.335499	0.358902			01:00:00	0.0534992	-0.168201			01:00:00	-0.2206	-0.641499			01:00:00	0.669699	0.250502
	01:10:00	-0.310301	0.1119			01:10:00	-0.103399	0.348299			01:10:00	0.251598	-0.601299			01:10:00	0.2624	0.5152
	01:20:00	0.5362	0.195198			01:20:00	0.341299	-0.0853996			01:20:00	-0.0944023	-0.4048			01:20:00	0.314201	0.490601
	01:30:00	0.385401	0.362099			01:30:00	0.2535	-0.3225			01:30:00	-0.493099	0.313198			01:30:00	0.658501	0.308399
	01:40:00	-0.0397987	0.493603			01:40:00	0.0352001	-0.6367			01:40:00	-0.2724	-0.1563			01:40:00	0.768101	0.0678005
	01:50:00	0.032999	0.737999			01:50:00	0.4526	-0.4496			01:50:00	-0.310299	-0.3713			01:50:00	0.5963	0.433302
	02:00:00	0.3575	-0.303802			02:00:00	0.564301	-0.5359			02:00:00	-0.218601	-0.426601			02:00:00	0.6663	0.389103
	02:10:00	0.758501	-0.193001			02:10:00	-0.136299	-0.2616			02:10:00	-0.245499	-0.338001			02:10:00	0.569799	0.382299
	02:20:00	-0.4681	0.129299			02:20:00	0.3148	-0.1457			02:20:00	-0.148502	-0.424			02:20:00	0.521099	0.377199
	02:30:00	0.173401	-0.409801			02:30:00	0.370399	-0.1593			02:30:00	0.5811	-0.120598			02:30:00	-0.0177002	0.514399
	02:40:00	0.251299	0.679798			02:40:00	-0.0412998	-0.4559			02:40:00	0.211102	0.2537			02:40:00	-0.121599	0.809299
	02:50:00	0.422998	0.420101			02:50:00	-0.0662003	-0.254			02:50:00	0.0802994	0.431099			02:50:00	-0.255901	0.447697
	03:00:00	0.275	0.622898			03:00:00	-0.0886993	-0.298			03:00:00	0.3577	0.394699			03:00:00	0.163801	0.738199
	03:10:00	-0.0995998	0.815899			03:10:00	-0.2514	-0.199299			03:10:00	-0.480999	-0.0284996			03:10:00	-0.0699005	0.5734
	03:20:00	-0.450802	0.491898			03:20:00	-0.220301	-0.1269			03:20:00	-0.0678024	-0.3992			03:20:00	-0.0438004	0.7621
	03:30:00	-0.189001	0.552002			03:30:00	-0.565701	-0.157501			03:30:00	0.140598	0.410103			03:30:00	-0.524	0.199001
	03:40:00	-0.119001	0.755798			03:40:00	-0.247599	-0.3883			03:40:00	-0.389801	-0.0979996			03:40:00	-0.3731	0.449699
	03:50:00	0.0396004	0.6651			03:50:00	-0.031601	-0.4359			03:50:00	0.0886993	0.432102			03:50:00	-0.4482	0.182899
	04:00:00	-0.349699	0.404503			04:00:00	-0.304501	0.298599			04:00:00	-0.499702	0.1572			04:00:00	-0.3902	0.176899
	04:10:00	0.1544	-0.0122986			04:10:00	-0.5182	0.0377007			04:10:00	0.2854	0.0993004			04:10:00	-0.334101	0.208401
	04:20:00	-0.461401	0.0226021			04:20:00	-0.3018	-0.112301			04:20:00	0.340599	0.232899			04:20:00	-0.00979996	0.552797
	04:30:00	-0.119801	-0.390099			04:30:00	-0.515499	0.0625			04:30:00	-0.297897	0.239803			04:30:00	0.358299	1.0617
	04:40:00	-0.298399	-0.236			04:40:00	-0.333899	0.378601			04:40:00	0.0261002	0.533604			04:40:00	0.797001	0.266399
	04:50:00	0.3479	-0.300098			04:50:00	0.558701	0.00769997			04:50:00	-0.388	0.0468979			04:50:00	0.6749	-0.1639
	05:00:00	-0.0229988	-0.453201			05:00:00	-0.022501	0.2561			05:00:00	-0.071701	0.5443			05:00:00	0.9436	-0.319799
	05:10:00	-0.4291	-0.123402			05:10:00	-0.143301	0.4144			05:10:00	-0.285099	0.324802			05:10:00	1.366	-0.8664
	05:20:00	-0.4004	-0.0822983			05:20:00	-0.565899	0.495501			05:20:00	-0.335098	-0.3162			05:20:00	0.5769	-0.835201
	05:30:00	0	0.1591			05:30:00	-0.254	0.535599			05:30:00	-0.320301	0.0550995			05:30:00	0.858799	-1.0952
	05:40:00	0.0177002	0.4986			05:40:00	0.4487	0.4492			05:40:00	0.120399	-0.447899			05:40:00	0.7554	-1.5783
	05:50:00	0.209499	-0.608902			05:50:00	0.5504	-0.4219			05:50:00	0.389103	-0.2836			05:50:00	-0.6448	-1.0036
	06:00:00	0.2148	-0.211102			06:00:00	0.2714	-0.289			06:00:00	0.3503	-0.449303			06:00:00	-0.3946	-0.630899
	06:10:00	-0.218699	-0.306301			06:10:00	-0.1441	-0.4011			06:10:00	0.842701	0.350098			06:10:00	-0.2931	-0.220098
	06:20:00	0.1283	-0.215599			06:20:00	-0.630901	-0.439199			06:20:00	0.611797	0.312			06:20:00	-0.138601	-0.2736
	06:30:00	0.196301	-0.291298			06:30:00	0.191	-0.295599			06:30:00	0.280499	0.395199			06:30:00	-0.550402	1.0871
	06:40:00	0.499599	0.423901			06:40:00	0.0916004	-1.0258			06:40:00	0.350098	0.152802			06:40:00	-0.616501	0.1078
	06:50:00	0.6075	0.331299			06:50:00	-0.132198	-0.5637			06:50:00	0.4133	0.0445976			06:50:00	0.608799	-0.483101
	07:00:00	0.489201	-0.0433998			07:00:00	-0.3675	0.172298			07:00:00	0.404102	-0.0620003			07:00:00	0.442801	-0.698
	07:10:00	0.462801	0.293999			07:10:00	-0.3491	-1.2074			07:10:00	0.280598	0.2742			07:10:00	0.628899	-0.573502
	07:20:00	0.4946	-0.182796			07:20:00	-0.1752	0.5968			07:20:00	0.485802	0.543201			07:20:00	-0.600401	0.159
	07:30:00	0.2353	0.663799			07:30:00	-0.8039	-1.005			07:30:00	0.361401	0.2374			07:30:00	0.5131	0.191799
	07:40:00	0.1807	0.593498			07:40:00	-0.7854	-0.810699			07:40:00	0.298302	0.375401			07:40:00	1.3047	-0.9867
	07:50:00	-0.0131989	0.519501			07:50:00	-0.4981	-0.178299			07:50:00	0.399399	-0.212502			07:50:00	0.879301	-0.053299
	08:00:00	0.2556	0.600197			08:00:00	-0.2437	-0.4154			08:00:00	0.173401	-0.3965			08:00:00	0.821402	-1.5954
	08:10:00	0.5268	0.112198			08:10:00	-0.110901	-0.491999			08:10:00	0.344402	-0.4436			08:10:00	0.872	-1.6079
	08:20:00	0.5315	-0.145599			08:20:00	-0.3461	-0.358599			08:20:00	0.417099	0.130199			08:20:00	0.418001	-0.2743
	08:30:00	0.5867	-0.0196991			08:30:00	0.461699	0.2792			08:30:00	0.282299	-0.0429001			08:30:00	0.0799999	-0.6777
	08:40:00	0.513399	-0.0188026			08:40:00	0.2848	-0.820499			08:40:00	0.170498	-0.343601			08:40:00	0.014801	0.705999
	08:50:00	0.261101	-0.316799			08:50:00	0.1686	-0.116499			08:50:00	0.4286	-0.268497			08:50:00	-0.3008	0.3314
	09:00:00	0.3169	-0.368401			09:00:00	0.0674992	-0.4711			09:00:00	0.5355	-0.182701			09:00:00	0.511301	-0.146601
	09:10:00	0.516499	0.686199			09:10:00	0.565901	-0.284199			09:10:00	0.5117	0.035099			09:10:00	0.243101	-0.5872
	09:20:00	0.843201	0.113899			09:20:00	-0.1968	0.605499			09:20:00	0.539299	0.109501			09:20:00	-0.240601	-0.184301
	09:30:00	1.0778	-0.1479			09:30:00	-0.1227	0.801001			09:30:00	0.500698	-0.00689697			09:30:00	1.2322	-0.824099
	09:40:00	-0.624899	0.140099			09:40:00	-0.264101	0.228399			09:40:00	0.408203	0.167999			09:40:00	0.2882	-0.9319
	09:50:00	-0.484098	0.360401			09:50:00	0.2306	0.085701			09:50:00	0.482201	0.144199			09:50:00	-0.5602	-0.5042
	10:00:00	0.4102	-0.0372009			10:00:00	-0.428499	-0.035099			10:00:00	0.5084	0.058403			10:00:00	-0.6672	0.7465
	10:10:00	0.4058	-0.3022			10:10:00	0.305799	0.187199			10:10:00	0.5774	0.00320053			10:10:00	0.0300007	0.6653
	10:20:00	0.480999	-0.224102			10:20:00	0.4608	-0.0888004			10:20:00	0.4408	0.0690002			10:20:00	0.4485	0.902
	10:30:00	0.6259	0.1866			10:30:00	0.621199	-0.263901			10:30:00	0.269001	0.2785			10:30:00	0.687901	0.4468
	10:40:00	0.2265	0.587502			10:40:00	-0.0846996	-0.254			10:40:00	0.597198	0.175098			10:40:00	0.568901	0.498299
	10:50:00	-0.2659	-0.361			10:50:00	-0.1866	-0.3834			10:50:00	0.476601	0.218899			10:50:00	0.6299	-0.350899
	11:00:00	0.0524006	-0.288101			11:00:00	0.5702	-0.1551			11:00:00	0.4296	0.185398			11:00:00	0.5422	0.7115
	11:10:00	0.203899	-0.265297			11:10:00	-0.1056	-0.7295			11:10:00	0.447701	-0.192802			11:10:00	0.6481	0.6744
	11:20:00	0.288599	-0.171299			11:20:00	0.9648	-0.354399			11:20:00	0.2295	-0.1311			11:20:00	0.0830994	-1.1721
	11:30:00	0.399401	-0.00439835			11:30:00	0.5355	-0.4445			11:30:00	0.293602	-0.0131035			11:30:00	-0.3664	-0.532501
	11:40:00	0.152399	0.738499			11:40:00	-0.1572	-0.498899			11:40:00	0.2915	0.00659943			11:40:00	-0.0317001	-0.5109
	11:50:00	0.560101	-0.171799			11:50:00	0.3869	-0.689999			11:50:00	0.382103	-0.0421028			11:50:00	1.1928	0.564199
	12:00:00	0.2864	0.650799			12:00:00	0.256399	-0.00149918			12:00:00	0.125397	0.267998			12:00:00	0.183199	0.673399
	12:10:00	0.218	0.4552			12:10:00	0.1136	-0.3571			12:10:00	-0.1278	0.0552979			12:10:00	-0.0995007	0.9284
	12:20:00	0.377501	-0.285702			12:20:00	-0.2661	-0.393702			12:20:00	-0.321899	0.223301			12:20:00	-0.0837994	0.740601
	12:30:00	0.251202	-0.336498			12:30:00	0.0925007	-0.243999			12:30:00	-0.476101	0.120602			12:30:00	1.1762	-0.144701
	12:40:00	0.478601	-0.476002			12:40:00	0.450201	-0.0727997			12:40:00	-0.443901	-0.0676994			12:40:00	0.625599	-0.281401
	12:50:00	-0.149599	-0.178997			12:50:00	0.595001	0.0699997			12:50:00	-0.277401	0.1791			12:50:00	0.431801	1.0392
	13:00:00	0.6092	0.127697			13:00:00	-0.503199	0.378599			13:00:00	-0.346802	-0.0293007			13:00:00	-0.1866	-0.3043
	13:10:00	-0.0785999	0.322201			13:10:00	0.1747	0.317499			13:10:00	-0.339199	0.1922			13:10:00	-0.4049	-0.428801
	13:20:00	-0.0932999	0.5275			13:20:00	0.470699	0.583599			13:20:00	-0.469501	0.113098			13:20:00	-0.923199	-0.4049
	13:30:00	0.4492	0.170799			13:30:00	0.3283	0.296499			13:30:00	-0.387501	-0.271198			13:30:00	-0.0440998	-0.351599
	13:40:00	0.1591	-0.316101			13:40:00	0.2554	0.542			13:40:00	-0.417702	-0.427002			13:40:00	-0.025301	-0.2938
	13:50:00	-0.173801	-0.3465			13:50:00	0.5347	0.3911			13:50:00	0.453701	0.382401			13:50:00	-0.660999	0.8584
	14:00:00	0.154701	0.422798			14:00:00	-0.094101	0.595701			14:00:00	0.224098	0.4505			14:00:00	0.124001	0.7414
	14:10:00	0.4669	-0.118702			14:10:00	0.330101	0.5877			14:10:00	-0.3601	-0.0214996			14:10:00	0.8169	0.302099
	14:20:00	0.2533	0.243099			14:20:00	0.140701	0.664499			14:20:00	0.432796	0.0823975			14:20:00	0.636999	0.6653
	14:30:00	0.267799	0.383701			14:30:00	-0.0415001	0.624599			14:30:00	0.365402	0.344101			14:30:00	1.2963	0.380499
	14:40:00	0.251501	-0.1922			14:40:00	0.174801	0.586201			14:40:00	0.258701	0.2742			14:40:00	0.856001	0.1749
	14:50:00	0.475698	-0.194298			14:50:00	0.218201	0.650101			14:50:00	0.0384026	-0.4384			14:50:00	0.5902	0.539499
	15:00:00	0.0235996	-0.341999			15:00:00	0.512699	0.0600986			15:00:00	0.356602	0.2654			15:00:00	0.803202	-0.0793991
	15:10:00	0.263901	-0.4744			15:10:00	0.6633	0.1273			15:10:00	0.269398	0.195301			15:10:00	0.888201	0.2771
	15:20:00	0.0747013	-0.2346			15:20:00	0.0053997	0.610399			15:20:00	0.4161	0.227501			15:20:00	0.5021	0.885399
	15:30:00	0.030901	-0.672199			15:30:00	-0.615999	0.5168			15:30:00	0.420399	0.292397			15:30:00	0.126202	0.859499
	15:40:00	-0.0761013	-0.435902			15:40:00	0.6509	0.3402			15:40:00	0.414299	0.101402			15:40:00	1.2154	-0.771999
	15:50:00	0.3902	-0.084301			15:50:00	0.4629	0.4585			15:50:00	0.337898	0.241199			15:50:00	0.968	-0.4084
	16:00:00	0.351601	-0.236702			16:00:00	0.5448	0.479198			16:00:00	0.3176	0.246399			16:00:00	0.280001	-0.0312004
	16:10:00	0.1276	0.427502			16:10:00	0.0263996	0.604			16:10:00	0.3242	0.179497			16:10:00	0.3892	-0.1455
	16:20:00	-0.2682	0.290699			16:20:00	-0.0879002	0.451			16:20:00	0.178902	0.308998			16:20:00	-0.3006	-0.1367
	16:30:00	-0.2174	-0.275803			16:30:00	-0.626699	0.333			16:30:00	0.510601	0.327301			16:30:00	-0.582899	0.266201
	16:40:00	-0.0454006	0.2099			16:40:00	-0.3253	0.354801			16:40:00	0.155197	0.426498			16:40:00	-0.6071	-0.435499
	16:50:00	0.0684986	-0.2038			16:50:00	-0.551699	0.287401			16:50:00	0.311798	0.376202			16:50:00	-0.715302	-0.4492
	17:00:00	-0.0528984	-0.379902			17:00:00	-0.682201	0.5744			17:00:00	0.211998	0.3479			17:00:00	0.115101	-0.935799
	17:10:00	0.201599	0.0868988			17:10:00	-0.615501	0.440201			17:10:00	0.4618	0.150497			17:10:00	-0.52	-0.2246
	17:20:00	0.2171	-0.338898			17:20:00	-0.3543	0.341801			17:20:00	0.230602	0.325397			17:20:00	-0.2064	0.0168018
	17:30:00	0.3437	-0.352699			17:30:00	-0.491899	0.2244			17:30:00	0.209499	0.346001			17:30:00	0.00900078	1.0819
	17:40:00	0.327101	-0.572102			17:40:00	0.0834999	0.7631			17:40:00	0.434803	0.365799			17:40:00	0.374001	0.3267
	17:50:00	0.221201	-0.422802			17:50:00	-0.2285	0.5942			17:50:00	0.0981979	0.297699			17:50:00	0.822399	0.1457
	18:00:00	-0.2425	-0.528099			18:00:00	0.2162	0.7083			18:00:00	0.363102	0.225101			18:00:00	0.4116	0.231401
	18:10:00	0.0746002	0.0823975			18:10:00	0.1992	0.5373			18:10:00	0.438801	0.168602			18:10:00	0.347099	-0.593199
	18:20:00	0.247	0.1632			18:20:00	-0.0790997	0.519501			18:20:00	0.0601997	-0.0200005			18:20:00	-0.352501	-0.5471
	18:30:00	0.0323009	-0.401699			18:30:00	0.4167	0.405199			18:30:00	-0.144501	0.0957985			18:30:00	-0.8762	-0.65
	18:40:00	-0.0167999	0.00670242			18:40:00	0.6339	0.335499			18:40:00	-0.0630989	-0.188103			18:40:00	-0.6087	0.1847
	18:50:00	-0.0207005	0.133202			18:50:00	-0.607199	0.358099			18:50:00	0.235302	-0.188999			18:50:00	-0.394899	0.2474
	19:00:00	-0.316099	0.046402			19:00:00	0.1213	0.4335			19:00:00	0.350899	0.0563965			19:00:00	-0.488701	-0.1556
	19:10:00	-0.0995007	0.0713005			19:10:00	0.00440025	0.4748			19:10:00	0.297497	-0.0466995			19:10:00	-0.2146	-0.1675
	19:20:00	-0.433001	-0.173599			19:20:00	0.3519	0.605801			19:20:00	0.3619	0.00779724			19:20:00	-0.510799	-0.0468998
	19:30:00	-0.192799	0.299			19:30:00	-0.0408001	0.6194			19:30:00	0.2509	-0.072197			19:30:00	-0.201601	0.5138
	19:40:00	0.1922	-0.348202			19:40:00	0.0689011	0.7661			19:40:00	0.4874	-0.0858002			19:40:00	-0.313002	-0.0577984
	19:50:00	0.2327	-0.354198			19:50:00	0.3846	0.725201			19:50:00	0.4884	-0.0675011			19:50:00	-0.785299	-0.333799
	20:00:00	0.5245	-0.439999			20:00:00	-0.1343	0.3748			20:00:00	0.249401	-0.1805			20:00:00	-0.301701	-0.152199
	20:10:00	0.388901	0.235203			20:10:00	-0.2778	0.4953			20:10:00	0.365402	-0.137699			20:10:00	-0.3526	0.146099
	20:20:00	0.3568	0.0898018			20:20:00	-0.440199	-0.276501			20:20:00	0.490303	-0.107597			20:20:00	-0.235199	0.0112
	20:30:00	0.631199	-0.0172005			20:30:00	-0.4154	0.288399			20:30:00	0.441999	-0.291801			20:30:00	0.310501	-0.5772
	20:40:00	0.6814	0.0256004			20:40:00	0.7204	0.3162			20:40:00	0.198502	-0.297497			20:40:00	0.646101	-0.511002
	20:50:00	0.5408	0.165997			20:50:00	-0.351898	-0.0474014			20:50:00	0.0876999	0.481903			20:50:00	0.398901	-0.336199
	21:00:00	0.4191	-0.307499			21:00:00	-0.607201	0.0202999			21:00:00	0.2202	0.446701			21:00:00	0.0548992	0.342001
	21:10:00	-0.4154	-0.180202			21:10:00	-0.526699	0.261801			21:10:00	0.192101	0.496098			21:10:00	0.5774	-0.620501
	21:20:00	0.249201	0.200199			21:20:00	-0.8657	-0.222099			21:20:00	0.252197	0.435902			21:20:00	0.628599	-0.564301
	21:30:00	0.742399	0.298603			21:30:00	-0.183399	-0.5438			21:30:00	0.330902	0.309399			21:30:00	1.5731	-0.0601997
	21:40:00	0.669401	0.0287971			21:40:00	0.326	0.128099			21:40:00	0.284801	0.444			21:40:00	1.3585	-0.2143
	21:50:00	0.623701	0.385399			21:50:00	0.677299	0.2122			21:50:00	0.4347	0.260799			21:50:00	0.795601	-0.234301
	22:00:00	0.272499	-0.124401			22:00:00	0.0750008	0.277			22:00:00	0.1898	0.415604			22:00:00	0.928299	0.0659008
	22:10:00	0.3463	-0.758602			22:10:00	-0.241001	0.376301			22:10:00	0.154099	0.3661			22:10:00	0.160799	-0.262501
	22:20:00	0.508801	0.173298			22:20:00	-0.3074	0.2969			22:20:00	0.4175	-0.0728989			22:20:00	0.6563	0.3813
	22:30:00	0.1798	-0.325001			22:30:00	-0.328899	-0.0699997			22:30:00	0.496899	0.109901			22:30:00	0.653	0.0184994
	22:40:00	-0.183701	-0.671001			22:40:00	0.4258	0.2927			22:40:00	0.486	0.0321007			22:40:00	-0.3426	0.3955
	22:50:00	0.430399	-0.353603			22:50:00	0.4646	0.286301			22:50:00	0.648403	-0.174603			22:50:00	0.777	-0.0597
	23:00:00	0.190599	0.174702			23:00:00	-0.0198002	0.4979			23:00:00	0.5634	0.0174026			23:00:00	0.3172	-0.2146
	23:10:00	-0.0422001	-0.416203			23:10:00	0.381699	0.374399			23:10:00	0.349102	0.117001			23:10:00	0.0998993	-0.721001
	23:20:00	0.545601	-0.00270081			23:20:00	0.0262012	0.701101			23:20:00	0.332199	-0.164898			23:20:00	0.6555	0.2876
	23:30:00	0.425301	-0.290199			23:30:00	0.306601	0.6231			23:30:00	0.205299	-0.5285			23:30:00	0.567701	-0.189301
	23:40:00	0.4233	0.0130005			23:40:00	0.326101	0.257401			23:40:00	0.0918999	-0.286701			23:40:00	1.0288	-1.2064
	23:50:00	0.6623	-0.1749			23:50:00	0.164801	0.4006			23:50:00	-0.237698	-0.0585022			23:50:00	-0.426298	-0.2549
	24:00	-0.1439	-0.0548973			24:00	0.4496	0.472			24:00	-0.3881	0.2803			24:00	-0.3041	-0.1061
	24:10	0.440201	-0.465099			24:10	0.599401	0.280699			24:10	-0.118301	0.2281			24:10	-0.3813	0.0373993
	24:20	0.0417004	-0.622398			24:20	0.5753	0.511599			24:20	-0.1115	0.2099			24:20	-0.5644	0.0818005
	24:30	0.1395	-0.410099			24:30	0.4715	-0.254099			24:30	-0.267101	-0.347			24:30	-0.204199	0.487301
	24:40	0.518999	-0.4804			24:40	0.7714	0.194901			24:40	-0.109798	-0.2234			24:40	-0.196199	-0.197399
	24:50	0.708399	-0.390999			24:50	0.2008	0.6159			24:50	0.187702	-0.274597			24:50	-0.00320053	-0.441799
	25:00	0.6378	0.1567			25:00	-0.462999	0.4436			25:00	0.0573997	-0.249401			25:00	0.368599	-0.0471001
	25:10	0.4897	-0.278698			25:10	-0.179201	0.5951			25:10	0.395397	-0.046299			25:10	-0.6898	-0.181301
	25:20	0.7335	0.0822983			25:20	0.5979	0.568399			25:20	0.316498	0.038002			25:20	-0.6602	0.0633011
	25:30	0.515701	-0.274399			25:30	0.5881	0.570101			25:30	0.243103	-0.123402			25:30	-0.102699	0.475201
	25:40	0.326099	-0.2136			25:40	-0.25	0.493			25:40	0.0741005	-0.266502			25:40	-0.4181	0.563299
	25:50	0.197599	-0.234001			25:50	-0.0676003	0.6611			25:50	-0.224201	-0.132198			25:50	-0.3874	-0.0262012
	26:00	0.812698	0.171997			26:00	0.0391006	0.647701			26:00	-0.338699	0.00939941			26:00	-0.114599	-0.4144
	26:10	0.7407	0.174			26:10	-0.2645	0.675701			26:10	-0.398499	0.245602			26:10	-0.3552	0.130402
	26:20	0.7743	0.0942993			26:20	-0.200901	0.686501			26:20	0.4874	-0.0181999			26:20	0.305899	0.3673
	26:30	0.6136	-0.013401			26:30	-0.3575	0.7652			26:30	0.431999	-0.0111008			26:30	0.4433	0.282299
	26:40	0.332701	0.0775986			26:40	0.3475	0.760799			26:40	0.0105019	-0.314697			26:40	0.5116	-0.0452003
	26:50	0.597799	0.315601			26:50	0.2866	0.991301			26:50	0.0738029	0.0587006			26:50	0.4888	0.576
	27:00	0.4137	-0.120998			27:00	-0.0689011	0.3729			27:00	-0.231998	0.331402			27:00	0.558901	0.1896
	27:10	0.691799	0.311401			27:10	0.108501	0.4429			27:10	-0.242298	-0.00149918			27:10	0.707201	0.4531
	27:20	0.4105	-0.255199			27:20	0.0153008	0.314301			27:20	0.100399	-0.103802			27:20	0.3041	0.4452
	27:30	0.142401	-0.418598			27:30	0.916901	0.1171			27:30	0.1954	-0.812302			27:30	0.8265	-0.507
	27:40	-0.389198	0.0652008			27:40	0.408199	-0.0118999			27:40	-0.328899	-0.529602			27:40	1.1247	-0.5711
	27:50	0.3818	0.5606			27:50	0.7162	0.182699			27:50	0.316299	0.287102			27:50	0.4487	-0.5644
	28:00	0.500299	0.817799			28:00	0.810598	0.4972			28:00	0.444599	0.366901			28:00	0.465601	-0.5432
	28:10	0.3274	0.4319			28:10	0.9499	-0.0689011			28:10	0.439701	0.284			28:10	0.187	-0.563801
	28:20	0.369902	-0.334999			28:20	1.2948	-0.192101			28:20	0.508202	0.0270996			28:20	-0.280199	-0.667599
	28:30	0.665401	0.220402			28:30	0.956902	-0.2813			28:30	0.449799	0.143902			28:30	-0.581001	-0.694599
	28:40	0.996698	0.0687981			28:40	0.625999	-0.1555			28:40	0.395401	-0.195099			28:40	-0.0132999	-1.0423
	28:50	0.474501	-0.506901			28:50	0.532501	-0.0613995			28:50	0.491203	0.166			28:50	0.0465012	-1.0568
	29:00	0.3395	-0.906601			29:00	0.427	-0.100599			29:00	0.351101	-0.235397			29:00	0.4266	-0.6667
	29:10	0.114399	-0.745899			29:10	0.3134	0.5695			29:10	0.2966	0.329899			29:10	0.3081	-0.0496998
	29:20	0.431	-0.7598			29:20	0.2551	0.245399			29:20	-0.480003	0.216499			29:20	0.538	-0.530399
	29:30	0.178501	-0.413902			29:30	-0.506601	0.4716			29:30	0.472698	-0.0959015			29:30	0.465399	-0.803101
	29:40	0.386501	-0.492001			29:40	-0.00899887	0.469999			29:40	0.496197	-0.0550003			29:40	0.2104	-0.886499
	29:50	0.2563	-0.925301			29:50	-0.314499	0.302999			29:50	0.399197	0.2342			29:50	0.7069	-0.171001
	30:00	1.0018	-0.823502			30:00	-0.139799	0.502199			30:00	0.531101	0.178299			30:00	0.202599	0.224699
	30:10	0.728001	-1.0779			30:10	0.0219002	0.565599			30:10	0.339798	0.0846977			30:10	0.104801	0.780001
	30:20	0.628201	-0.437401			30:20	0.5112	0.4081			30:20	0.217899	0.323601			30:20	0.2873	0.4086
	30:30	0.342001	-0.3867			30:30	0.6224	0.8652			30:30	0.302101	0.1105			30:30	0.246099	0.3589
	30:40	0.375099	-0.777			30:40	0.799101	1.3661			30:40	0.254303	0.167503			30:40	-0.1255	0.686201
	30:50	-0.0740986	-0.641998			30:50	0.5348	0.730999			30:50	0.261402	0.215397			30:50	-0.2218	0.1698
	31:00	0.513601	0.116501			31:00	1.2333	0.502701			31:00	0.400101	0.100201			31:00	-0.398201	-0.1418
	31:10	0.5016	0.355103			31:10	0.8841	0.3498			31:10	0.408501	0.091301			31:10	-0.4212	0.335402
	31:20	-0.2565	0.537601			31:20	-0.0541	-0.702801			31:20	0.360001	-0.0502014			31:20	-0.4501	0.7425
	31:30	0.9573	0.192398			31:30	-0.611401	0.3368			31:30	-0.476101	-0.0373001			31:30	-0.2381	0.502499
	31:40	0.522499	-0.094902			31:40	-0.270401	0.435701			31:40	0.421902	0.0782013			31:40	-0.490599	0.133099
	31:50	0.930599	-0.00289917			31:50	0.789999	0.171001			31:50	0.2715	0.1465			31:50	-0.1926	0.293201
	32:00	0.873701	0.2103			32:00	-0.398899	-0.228399			32:00	0.434399	0.0620003			32:00	-0.5133	-0.2078
	32:10	0.8748	-0.0544968			32:10	-0.6628	-0.2498			32:10	0.3862	0.0781975			32:10	-0.8654	-0.0820007
	32:20	0.503201	0.336201			32:20	-0.8571	-0.0527			32:20	0.471001	-0.0866013			32:20	-0.582399	0.177601
	32:30	0.618801	0.127201			32:30	-0.7374	-0.204			32:30	0.4305	-0.134697			32:30	-0.273399	0.275
	32:40	1.1429	0.0452003			32:40	-0.7367	0.0946999			32:40	0.362999	0.0547028			32:40	-0.4457	0.250599
	32:50	0.782	-0.257202			32:50	-0.545601	0.1098			32:50	0.3978	-0.0877991			32:50	-0.151899	-0.539799
	33:00	1.0436	0.366199			33:00	-0.2834	-0.259501			33:00	0.385601	0.0839005			33:00	-0.740999	0.423401
	33:10	0.335899	-0.0213013			33:10	-0.326099	-0.227499			33:10	0.395802	0.155899			33:10	-0.313499	0.301899
	33:20	0.457399	0.247902			33:20	-0.867701	-0.241499			33:20	0.398102	0.134502			33:20	0.5746	-0.0425014
	33:30	0.124199	-0.254398			33:30	-0.332602	-0.5075			33:30	0.2575	0.2155			33:30	0.468201	0.00419998
	33:40	-0.0146999	-0.0503998			33:40	-0.5189	0.4263			33:40	0.5145	-0.220802			33:40	0.775099	-0.1045
	33:50	-0.5296	-0.313599			33:50	-0.0443993	0.677599			33:50	0.350899	0.0315018			33:50	1.5055	0.316601
	34:00	-0.2547	-0.298702			34:00	-0.2279	0.3946			34:00	0.405899	-0.265602			34:00	1.4393	0.9345
	34:10	-0.2512	0.0485001			34:10	0.441	0.213202			34:10	0.601398	-0.217098			34:10	1.4813	0.226301
	34:20	-0.2666	-0.484303			34:20	0.297899	0.3393			34:20	0.388	-0.0872002			34:20	1.0634	0.8288
	34:30	0.2789	-0.486298			34:30	0.0842018	0.5002			34:30	0.440098	0.0335999			34:30	0.9547	0.2185
	34:40	-0.7216	0.407799			34:40	-0.567501	0.1409			34:40	0.550602	0.142399			34:40	0.927999	0.148401
	34:50	0.108	0.2202			34:50	-0.470699	0.281199			34:50	0.523201	-0.123802			34:50	0.6504	0.0470009
	35:00	0.0556984	0.642101			35:00	0.445799	0.3389			35:00	0.535603	-0.124901			35:00	0.688301	-0.0105
	35:10	0.0198994	0.4468			35:10	0.3668	0.409201			35:10	0.469101	-0.27			35:10	0.864201	0.116301
	35:20	0.2803	0.465801			35:20	-0.1866	0.528801			35:20	0.523701	-0.0702019			35:20	0.6749	0.951698
	35:30	0.2616	0.875698			35:30	-0.508099	0.344601			35:30	0.519798	-0.0615005			35:30	0.777102	0.716299
	35:40	-0.548601	0.501499			35:40	-0.498899	-0.0557995			35:40	0.424599	0.0619011			35:40	0.839399	0.7201
	35:50	0.502298	0.394901			35:50	-0.3832	0.0202999			35:50	0.467201	-0.170601			35:50	0.8447	0.9139
	36:00	0.420301	0.555801			36:00	-0.6457	0.249401			36:00	0.3778	0.0124969			36:00	0.7932	0.941
	36:10	0.567299	-0.272701			36:10	-0.604801	0.2038			36:10	0.407799	-0.100803			36:10	1.1196	0.0100994
	36:20	0.758801	-0.125801			36:20	-0.183802	0.511499			36:20	0.548	0.00209808			36:20	1.0339	-0.431101
	36:30	0.633001	-0.5606			36:30	0.314199	0.3997			36:30	0.542702	-0.0209999			36:30	0.527199	-0.5159
	36:40	0.194101	-0.499599			36:40	0.192699	-0.2012			36:40	0.357101	0.0159035			36:40	0.2568	-0.706499
	36:50	0.2941	-0.0716019			36:50	0.2572	-0.362999			36:50	-0.123798	-0.0713997			36:50	0.588699	-0.287401
	37:00	0.503201	0.172401			37:00	0.4149	0.118299			37:00	0.065197	0.148098			37:00	0.101702	-0.3358
	37:10	0.235298	0.370499			37:10	-0.105299	0.4175			37:10	0.081398	0.245998			37:10	0.181801	-0.187201
	37:20	-0.694099	0.5438			37:20	-0.1094	0.497999			37:20	0.2281	0.2173			37:20	-0.0499992	-0.344601
	37:30	0.1513	0.704899			37:30	0.3459	0.192499			37:30	-0.0760994	0.1917			37:30	-0.4312	0.425999
	37:40	0.110601	0.394501			37:40	0.587601	-0.0389004			37:40	-0.0994987	0.3088			37:40	-0.318399	0.354
	37:50	0.657801	0.109901			37:50	0.516701	0.103899			37:50	0.0849991	0.320499			37:50	-0.1185	0.6875
	38:00	0.669201	-0.177101			38:00	0.215502	0.027401			38:00	0.0129013	0.318298			38:00	-0.116501	0.7805
	38:10	-0.485399	-0.348202			38:10	0.4438	-0.120001			38:10	-0.0998001	0.302799			38:10	0.118999	0.319401
	38:20	-0.338902	0.252201			38:20	0.3578	0.1565			38:20	0.259899	0.193398			38:20	0.0855999	0.460201
	38:30	-0.6147	-0.4389			38:30	0.0972996	-0.2976			38:30	-0.0530014	0.0491982			38:30	-0.1434	0.328798
	38:40	-0.7356	-0.0108986			38:40	-0.264099	-0.2654			38:40	-0.1049	0.184101			38:40	0.0354004	-0.3932
	38:50	-0.3113	-0.1012			38:50	-0.4622	-0.252701			38:50	-0.0150986	0.212799			38:50	0.2134	-0.5473
	39:00	-0.6989	-0.0174026			39:00	-0.510601	0.0526009			39:00	-0.1908	0.363102			39:00	0.174801	-0.4513
	39:10	-0.5049	-0.389301			39:10	-0.0726986	-0.299			39:10	0.00770187	0.194798			39:10	0.0785999	-0.682798
	39:20	-0.292299	-0.709599			39:20	-0.473	0.369699			39:20	0.0868988	0.443699			39:20	0.116199	-0.2131
	39:30	-0.116199	-0.9552			39:30	-0.323	-0.301399			39:30	0.361797	0.2799			39:30	0.00959969	0.5902
	39:40	-0.605799	-0.562702			39:40	-0.1073	-0.268299			39:40	0.392197	0.379398			39:40	-0.0711002	0.310301
	39:50	0.0496998	-0.8787			39:50	-0.1707	-0.292601			39:50	0.163898	0.362698			39:50	0.245701	0.117001
	40:00	0.607	-0.1236			40:00	-0.205101	-0.189199			40:00	0.0677986	0.489399			40:00	-0.2547	-0.224501
	40:10	0.1537	-0.416901			40:10	-0.389	-0.0312996			40:10	0.158802	0.378597			40:10	-0.3971	-0.579
	40:20	-0.242901	-0.453999			40:20	-0.4345	-0.0739994			40:20	0.292801	0.2831			40:20	-0.0221996	-0.3419
	40:30	-0.4785	-0.023201			40:30	-0.4284	0.2827			40:30	0.2509	0.378899			40:30	-0.7253	-0.278601
	40:40	-0.6105	-0.0485001			40:40	-0.5511	0.391001			40:40	0.482801	0.214798			40:40	-0.4937	-0.0480995
	40:50	-0.301699	-0.463501			40:50	-0.511	0.2637			40:50	0.228001	0.151897			40:50	-0.3228	-0.1451
