# Supplementary material for: Live imaging of hair bundle polarity acquisition demonstrates a critical timeline for transcription factor Emx2
Source: eLife. 2020 Sep 23;9:e59282. doi: 10.7554/eLife.59282 (PMC7535933; doi:10.7554/eLife.59282)
Supplement: Figure 2—figure supplement 4—source data 2. [file elife-59282-fig2-figsupp4-data2.xlsx]

## Sheet: Sheet1
	Figure 2--figure supplement 4--source data 2
	Relative positions of the DC compared to the MC in Md and Lat supporting cells at different time points.
	Md SCs at 0 hr				Md SCs at 24 hr					Lat SCs at 0 hr				Lat SCs at 40.5 hr
	Cell #	DC-X relative to the MC-X (μm)	DC-Y relative to the MC-Y (μm)		Cell #	DC-X relative to the MC-X (μm)	DC-Y relative to the MC-Y (μm)			Cell #	DC-X relative to the MC-X (μm)	DC-Y relative to the MC-Y (μm)		Cell #	DC-X relative to the MC-X (μm)	DC-Y relative to the MC-Y (μm)
	1	-0.607	0.1978		1	0.584099	-0.427601			1	-0.171799	-0.724998		1	0.316401	0.440399
	2	-0.993101	0.181297		2	-0.3598	-0.667301			2	0.1182	0.618095		2	0.754101	-0.633499
	3	-0.3889	-0.4016		3	-0.0497999	-0.223301			3	-0.0607014	0.703102		3	0.571701	0.267799
	4	-0.372499	-0.5158		4	-0.4055	0.325802			4	0.692101	-0.0234985		4	-0.1292	0.313301
	5	0.545599	-0.00849915		5	0.377401	-0.699699			5	0.414099	-0.570206		5	0.368999	0.240898
	6	-0.277901	0.513699		6	-0.305799	0.0808983			6	-0.6502	0.713799		6	-0.0788002	-0.238297
	7	-1.4102	0.360203		7	-0.4809	-0.480701			7	-0.182199	0.570297		7	-0.746101	0.369705
	8	0.077301	0.778797		8	-0.2584	-0.3337			8	-0.0660992	0.469299		8	0.360399	-0.487694
	9	-0.444302	0.741402		9	0.504299	0.552401			9	0.253101	0.325401		9	0.186399	0.718697
	10	-0.4184	0.259602		10	0.143	-0.557701			10	-0.157799	-0.134193		10	-0.312	-0.0294037
	11	-0.964899	-0.981199		11	-0.277199	0.312601			11	-0.2635	-0.0940018		11	-0.175697	-0.152702
	12	0.5324	-0.1409		12	0.0776997	0.3738			12	-0.1217	0.798103		12	-0.216	-0.155304
	13	0.0436001	0.6054		13	0.0881996	-0.757801			13	0.312	0.161598		13	-0.2934	-0.1408
	14	0.622101	0.0278015		14	0.0655994	0.970299			14	0.296	0.500999		14	0.585403	-0.6465
	15	0.4951	-0.261099		15	0.976	0.824499			15	-0.196598	-1.0682		15	-0.459	0.364899
	16	-0.9158	0.784599		16	-0.248301	-0.1229			16	-0.0910034	0.388401		16	0.501799	0.0326004
	17	-0.2327	0.6686		17	0.600101	-0.1318			17	-0.0174026	0.547897		17	0.7453	0.741398
	18	0.461601	0.151501		18	-1.1307	0.342199			18	-0.0723991	0.454597		18	0.798101	-0.680401
	19	-0.533298	0.1591		19	-0.0585995	0.309			19	-0.337997	0.214901		19	0.2533	-0.5047
	20	0.483599	-0.0345001		20	-0.34	0.429501			20	-0.589802	1.0222		20	0.0576992	0.663097
	21	-0.1423	-0.5884		21	0.444201	-0.071701			21	0.319099	-0.522598		21	0.3419	-0.1035
	22	0.1397	-0.6967		22	0.309601	0.0747986			22	-0.877102	-0.1991		22	-0.0205002	1.1952
	23	0.353302	-0.266699		23	0.260197	-0.2195			23	0.122299	-0.833099		23	0.6087	0.0984039
	24	-0.151201	0.3024		24	-0.3685	0.0774994			24	-0.768702	-0.258701		24	0.284801	-0.632706
	25	0.431	0.231201		25	-0.1273	0.0776005			25	-0.2586	0.1763		25	-0.554501	-0.499199
	26	-0.600201	-0.6632		26	0.812799	0.162802			26	-0.206699	-0.167801		26	-0.156599	-0.206299
	27	-0.647999	0.137201		27	0.565601	0.8417			27	0.222599	0.702503		27	-0.277901	-0.170097
	28	0.121399	0.42		28	-0.630901	-0.245901			28	0.1971	-0.216		28	0.6262	0.595802
	29	-0.170099	0.0638008		29	0.390202	0.8846			29	0.3389	-0.698002		29	0.6563	0.307301
	30	-0.0937004	-0.2421		30	0.731697	0.291401			30	-0.5361	-0.351501		30	-0.2661	0.203499
	31	-0.0967999	-0.3293		31	-0.512699	-0.536901			31	0.4354	-0.216499		31	0.431002	-0.1562
	32	-0.572401	-0.151199		32	-0.8078	0.0276012			32	0.8592	0.6147		32	0.441	-0.103199
	33	-0.422199	-0.311398		33	0.105202	-0.1457			33	-0.4098	-0.485302		33	-0.1672	0.8316
	34	-0.732401	-0.4492		34	-0.345001	0.1243			34	0.1026	-0.7929		34	0.7435	-0.222298
	35	-0.118702	-0.536301		35	0.0876007	-0.550503			35	0.1089	0.216		35	0.615	-0.431999
	36	-0.373699	0.765499		36	-0.370401	-0.305801			36	-0.3589	0.467903		36	0.103601	-0.228798
	37	0.812298	-0.4638		37	-0.1961	0.147697			37	-0.407	0.742798		37	0.313299	0.0960007
	38	-0.123901	0.776699		38	-0.3004	0.219799			38	0.410299	-0.172699		38	-0.216	0.285202
	39	1.5502	-0.180199		39	0.167999	-0.8167			39	-0.147401	0.342003		39	-0.2929	-0.1978
	40	-0.798599	-0.9631		40	-0.2125	0.219898			40	-0.7616	-0.481201		40	0.5918	-0.0412979
	41	-0.152	-0.0477982		41	0.578899	-0.245602			41	-0.5009	0.0827026		41	0.657	-0.107903
	42	-0.260601	-0.282001		42	0.388102	-0.0343018			42	-0.488	0.4701		42	0.8939	-0.208302
	43	-0.216	0.473		43	-0.0486012	1.0782			43	0.445601	-0.632301		43	1.3045	0.557899
	44	-0.5485	-0.215401		44	-0.4426	0.162899			44	0.2624	-0.206596		44	0.0374012	-0.490097
	45	-0.00469971	0.337097		45	-0.4095	-0.101398			45	0.5114	-0.104599		45	-0.176502	-0.0724983
	46	-0.2714	-0.247101		46	1.0052	-0.547501			46	-0.00039959	0.8396		46	0.259201	-0.219002
	47	-0.153101	0.321999		47	-0.4771	0.156601							47	-0.0946999	-0.0275002
	48	0.627098	-0.103802		48	0.00760078	-0.709499							48	0.7076	0.490002
	49	0.476902	0.233597		49	-0.660999	0.4146							49	0.00659943	0.147301
	50	-0.2537	0.0741997		50	0.625399	-0.372902							50	-0.287598	-0.365799
	51	0.377098	-0.248997		51	-0.108398	0.946999							51	0.3461	-0.0472984
	52	0.807301	0.0144005		52	-0.439499	0.1964							52	0.855301	0.325699
	53	-0.145302	0.551899		53	-0.648502	-0.447201							53	-0.138399	0.187901
	54	0.315701	0.348598		54	0.5021	-0.296701							54	0.391701	-0.0177002
	55	-0.156601	0.741199		55	-0.241302	0.0606003							55	0.529499	-0.0951996
