# Supplementary material for: Live imaging of hair bundle polarity acquisition demonstrates a critical timeline for transcription factor Emx2
Source: eLife. 2020 Sep 23;9:e59282. doi: 10.7554/eLife.59282 (PMC7535933; doi:10.7554/eLife.59282)
Supplement: Figure 2—source data 1. [file elife-59282-fig2-data1.xlsx]

## Sheet: Sheet1
	Figure 2--source data 1
	Coordinates of centriole positions relative to the center of the HC or the MC in Md HC1 and Lat HC1.
	Md HC1								Lat HC1
	Time (hr:min)	Phase	MC-X relative to the center of the cell (μm)	MC-Y relative to the center of the cell (μm)	DC-X relative to the center of the cell (μm)	DC-Y relative to the center of the cell (μm)			Time (hr:min)	Phase	DC-X relative to the MC-X (μm)	DC-Y relative to the MC-Y (μm)	MC-X relative to the center of the cell (μm)	MC-Y relative to the center of the cell (μm)	DC-X relative to the center of the cell (μm)	DC-Y relative to the center of the cell (μm)
	00:00:00	I	-0.5886	-0.560699	-0.399399	-0.221802			14:20:00	I	-0.364002	0.5424	-	-	-	-
	00:10:00	I	-0.473799	-0.565399	-0.636299	-0.448201			14:30:00	I	-0.533901	0.473202	-	-	-	-
	00:20:00	I	-0.4783	-0.472202	-0.7866	-0.0193024			14:40:00	I	-0.2784	0.66	-	-	-	-
	00:30:00	I	-0.365	-0.440098	-0.3279	-0.295898			14:50:00	I	-0.3349	0.577301	-	-	-	-
	00:40:00	I	-0.270599	-0.459702	-0.380699	0.0112991			15:00:00	I	-0.227303	0.357101	-	-	-	-
	00:50:00	I	-0.200701	-0.363001	-0.272501	-0.236099			15:10:00	I	-0.2183	0.552101	-	-	-	-
	01:00:00	I	-0.0368004	-0.363302	-0.0209007	-0.138401			15:20:00	I	-0.0545998	0.658001	-	-	-	-
	01:10:00	I	-0.0301991	-0.335302	0.173901	-0.127403			15:30:00	I	-0.241302	0.607201	-	-	-	-
	01:20:00	I	-0.0080986	-0.334	0.103701	-0.214001			15:40:00	I	0.1665	0.4258	-	-	-	-
	01:30:00	I	-0.139	-0.236599	-0.438499	-0.0270996			15:50:00	I	0.734299	0.3745	-	-	-	-
	01:40:00	I	-0.1847	-0.0579987	-0.466799	-0.0666008			16:00:00	I	0.509102	-0.609699	-	-	-	-
	01:50:00	I	-0.0256996	-0.1849	-0.0512009	-0.4158			16:10:00	I	0.3652	-0.673599	-	-	-	-
	02:00:00	I	-0.0161991	-0.172199	-0.2757	-0.309498			16:20:00	I	0.0718002	-0.379601	-	-	-	-
	02:10:00	I	-0.0452003	-0.158703	-0.125301	-0.510801			16:30:00	I	0.0135994	-0.6647	-	-	-	-
	02:20:00	I	-0.0349998	-0.103703	-0.1721	-0.606001			16:40:00	I	-0.2691	-0.402199	-	-	-	-
	02:30:00	I	-0.0226994	-0.464102	-0.0075999	-0.534902			16:50:00	I	-0.0804024	-0.410801	-	-	-	-
	02:40:00	I	-0.1332	-0.0429993	-0.1329	-0.435999			17:00:00	I	-0.549301	-0.376499	-	-	-	-
	02:50:00	I	-0.1287	-0.231102	0.1301	-0.1063			17:10:00	I	-0.431099	-0.421101	-	-	-	-
	03:00:00	I	-0.0648994	-0.1721	-0.222399	0.216801			17:20:00	I	-0.0508003	-0.1343	-	-	-	-
	03:10:00	I	-0.073801	-0.236	-0.295401	0.1586			17:30:00	I	-0.386002	-0.00709915	-	-	-	-
	03:20:00	I	-0.1164	-0.203899	-0.593901	0.458			17:40:00	I	-0.242496	0.489403	-	-	-	-
	03:30:00	I	-0.162201	-0.169201	-0.691601	0.129501			17:50:00	I	-0.0443001	0.4883	-	-	-	-
	03:40:00	I	-0.1311	-0.0951996	-0.493999	0.335701			18:00:00	I	0.356701	0.5952	-	-	-	-
	03:50:00	I	-0.219	-0.036499	0.1978	0.8246			18:10:00	I	0.710602	0.147701	-	-	-	-
	04:00:00	I	-0.264999	-0.195702	-0.9932	0.203197			18:20:00	I	0.49	0.0410004	-	-	-	-
	04:10:00	I	-0.117901	-0.2108	-0.7904	0.838703			18:30:00	I	0.2519	0.283699	-	-	-	-
	04:20:00	I	-0.264101	-0.128803	-0.3449	0.389698			18:40:00	I	0.3008	0.507401	-	-	-	-
	04:30:00	I	-0.202499	-0.145901	-0.0324001	1.1793			18:50:00	I	0.656	-0.143299	-	-	-	-
	04:40:00	I	-0.226601	-0.137299	-0.277	-0.0890986			19:00:00	I	0.358398	-0.450298	-	-	-	-
	04:50:00	I	-0.0963993	-0.1754	0.000700485	-0.1035			19:10:00	I	0.446199	-0.477001	-	-	-	-
	05:00:00	I	-0.0734997	-0.164101	-0.2139	0.624001			19:20:00	I	-0.0396996	-0.704903	-	-	-	-
	05:10:00	I	-0.200199	-0.249702	0.0128002	0.5812			19:30:00	I	0.363201	-0.664501	-	-	-	-
	05:20:00	I	0.0200005	-0.222797	-0.2166	1.1622			19:40:00	I	0.278599	-0.529602	-	-	-	-
	05:30:00	I	-0.158699	-0.2836	-0.483799	1.1349			19:50:00	I	0.336401	0.00660324	-	-	-	-
	05:40:00	I	-0.341101	-0.1768	-0.774799	0.112999			20:00:00	I	0.253302	0.181499	-	-	-	-
	05:50:00	I	-0.518801	-0.154701	-0.665501	-0.0452003			20:10:00	I	0.139301	0.2775	-	-	-	-
	06:00:00	I	-0.501801	-0.292999	-0.400799	-0.2188			20:20:00	I	0.119402	-0.1745	-	-	-	-
	06:10:00	I	-0.4328	-0.2616	-0.874901	-0.352402			20:30:00	I	0.610699	0.1152	-	-	-	-
	06:20:00	I	-0.252199	-0.1595	-0.514799	0.0349998			20:40:00	I	0.377699	0.216599	-	-	-	-
	06:30:00	I	-0.380001	-0.2183	-0.9214	0.0158997			20:50:00	I	0.4417	0.208401	-	-	-	-
	06:40:00	I	-0.431398	-0.306198	-0.871399	-0.122498			21:00:00	I	-	-	-0.0236015	-1.1109	0.738998	-0.778202
	06:50:00	I	-0.564199	-0.216801	-1.1756	-0.272102			21:10:00	I	-	-	0.094799	-0.705601	0.490299	-0.635601
	07:00:00	I	-0.501301	-0.165298	-1.1161	-0.257299			21:20:00	I	-	-	-0.429098	-0.2906	-0.621	0.159702
	07:10:00	I	-0.8232	-0.3923	-1.0929	-0.182499			21:30:00	I	-	-	0.132301	-0.123203	0.298599	-0.3461
	07:20:00	I	-0.6445	-0.3042	-0.674999	-0.3454			21:40:00	I	-	-	0.3228	-0.552803	0.909201	-0.722103
	07:30:00	I	-0.666201	-0.374401	-0.641701	-0.528601			21:50:00	I	-	-	0.0291977	0.0275002	0.0317993	0.347198
	07:40:00	I	-0.547501	-0.189098	-0.364201	-0.4166			22:00:00	I	-	-	0.0161018	0.3204	0.257599	0.899597
	07:50:00	I	-0.674299	-0.191299	-0.613499	-0.044899			22:10:00	I	-	-	-0.106102	0.132698	0.126801	0.0200996
	08:00:00	I	-0.744299	0.0802994	-0.9424	0.4156			22:20:00	I	-	-	-0.0191994	-0.120602	0.459301	-0.374401
	08:10:00	I	-0.557699	-0.196301	-0.6038	0.341999			22:30:00	I	-	-	-0.0379982	-0.00299835	0.328102	-0.655499
	08:20:00	I	-0.5149	-0.188099	-0.712299	-0.2635			22:40:00	I	-	-	-0.1796	0.2812	0.155697	-0.141399
	08:30:00	I	-0.6782	0.0172005	-0.5527	0.186802			22:50:00	I	-	-	-0.447098	0.280502	0.381901	-0.2104
	08:40:00	I	-0.879002	-0.1441	-0.7024	0.107601			23:00:00	I	-	-	-0.0751991	0.470299	0.1553	-0.150002
	08:50:00	II	-0.871399	0.0214996	-1.2709	-0.266899			23:10:00	I	-	-	-0.124798	0.4851	-0.106499	0.390701
	09:00:00	II	-0.879301	-0.039299	-1.1453	-0.542999			23:20:00	I	-	-	0.178097	0.416798	0.474899	0.0237999
	09:10:00	II	-0.775999	-0.117298	-1.1395	-0.406498			23:30:00	I	-	-	-0.116497	0.364101	-0.0682983	0.366001
	09:20:00	II	-0.732801	-0.272499	-1.1167	-0.378498			23:40:00	I	-	-	-0.180202	0.0620003	-0.0451012	0.486401
	09:30:00	II	-0.729	-0.243599	-1.0342	-0.759899			23:50:00	I	-	-	-0.0693016	0.1786	0.047699	0.667301
	09:40:00	II	-0.8393	-0.1917	-1.0835	-0.876499			24:00	I	-	-	0.0185013	0.243198	0.349102	0.604198
	09:50:00	II	-0.930099	-0.186501	-1.3277	-0.951202			24:10	I	-	-	0.221798	0.148899	0.6033	0.736599
	10:00:00	II	-1.0664	-0.1441	-1.2489	-0.8074			24:20	II	-	-	-0.108997	0.104599	0.416201	0.349899
	10:10:00	II	-0.921701	-0.145699	-1.4456	-0.7707			24:30	II	-	-	-0.0837021	0.156601	0.730299	0.247002
	10:20:00	II	-0.989199	-0.00149918	-1.5385	-0.584499			24:40	II	-	-	-0.00330353	0.0282021	0.625898	0.3311
	10:30:00	II	-0.767899	-0.0778999	-1.4519	-0.6175			24:50	II	-	-	0.0381012	0.318302	0.502201	0.578503
	10:40:00	II	-0.636101	0.0795975	-1.4324	-0.466801			25:00	II	-	-	-0.00110245	0.189701	0.418198	0.368099
	10:50:00	II	-0.7666	-0.107601	-1.664	-0.3685			25:10	II	-	-	0.194298	0.459202	1.0733	0.3596
	11:00:00	II	-0.757	-0.287899	-1.6477	-0.125198			25:20	II	-	-	0.0280991	0.121502	0.736799	0.332001
	11:10:00	II	-0.823	-0.0477982	-1.7781	-0.238598			25:30	II	-	-	0.234699	0.132	0.888599	0.383499
	11:20:00	II	-0.829599	-0.121002	-1.7424	-0.247002			25:40	II	-	-	0.0900993	0.184502	1.2798	0.367599
	11:30:00	II	-0.802099	-0.179901	-1.5328	-0.0447006			25:50	II	-	-	0.180702	0.161499	1.072	0.564697
	11:40:00	II	-0.5527	-0.242901	-1.4406	-0.243603			26:00	II	-	-	-0.1675	0.157799	0.7708	0.538902
	11:50:00	II	-0.638601	-0.224102	-1.3574	-0.241302			26:10	II	-	-	-0.179901	0.1581	0.8643	0.334301
	12:00:00	II	-0.761801	0.0584984	-1.7324	0.0527992			26:20	II	-	-	-0.1464	0.330299	0.827999	0.493
	12:10:00	II	-0.542	-0.0806999	-1.5561	-0.370903			26:30	II	-	-	-0.1464	0.254902	1.019	0.553501
	12:20:00	II	-0.515701	-0.3167	-1.1625	-0.643599			26:40	II	-	-	-0.427898	-0.0366974	0.49	0.0605011
	12:30:00	II	-0.5259	-0.516499	-1.3649	-0.7932			26:50	II	-	-	-0.280903	-0.109699	1.1239	0.228302
	12:40:00	II	-0.401199	-0.394501	-1.4639	-0.6408			27:00	II	-	-	-0.189701	0.180099	0.854599	0.468899
	12:50:00	II	-0.3913	-0.337898	-1.2943	-0.813698			27:10	II	-	-	-0.0709	0.00829697	1.0988	0.446999
	13:00:00	II	-0.1245	-0.3517	-1.2224	-0.753101			27:20	II	-	-	-0.0712013	-0.0464973	1.185	0.218403
	13:10:00	II	-0.00449944	-0.394897	-0.9196	-1.0876			27:30	II	-	-	-0.1189	-0.163197	1.0498	0.291302
	13:20:00	II	-0.0911007	-0.4734	-0.9321	-1.2619			27:40	II	-	-	0.220798	-0.2253	1.1097	0.143101
	13:30:00	II	-0.281099	-0.528099	-1.1484	-1.3715			27:50	II	-	-	0.111198	0.159298	0.981199	-0.1824
	13:40:00	II	-0.320099	-0.695	-1.3966	-1.1811			28:00	II	-	-	0.210201	-0.143997	1.1119	-0.451298
	13:50:00	II	-0.4345	-0.625198	-1.4236	-1.2661			28:10	II	-	-	0.0819969	-0.0881996	0.779299	-0.350601
	14:00:00	II	-0.4212	-0.650501	-1.2868	-1.4595			28:20	II	-	-	0.367401	-0.0800018	0.780499	-0.4944
	14:10:00	II	-0.5404	-0.746899	-1.1898	-1.3417			28:30	II	-	-	0.0811005	-0.3223	0.8535	-0.162502
	14:20:00	II	-0.582701	-0.716301	-1.0811	-1.5887			28:40	II	-	-	0.0290985	-0.207699	0.8207	-0.1166
	14:30:00	II	-0.629101	-0.630901	-0.896999	-1.6139			28:50	II	-	-	0.2062	-0.0877991	1.0814	-0.282299
	14:40:00	II	-0.467899	-0.6604	-0.8969	-1.6664			29:00	II	-	-	0.294399	-0.121601	1.1882	-0.157101
	14:50:00	II	-0.473499	-0.762897	-0.684599	-1.6812			29:10	II	-	-	0.2654	-0.0750008	0.8305	-0.3853
	15:00:00	II	-0.626001	-0.924603	-0.8437	-1.6736			29:20	II	-	-	0.133602	-0.172302	0.768101	-0.5075
	15:10:00	II	-0.4806	-0.799103	-0.641602	-1.9021			29:30	II	-	-	0.267803	-0.0256996	0.831501	-0.299099
	15:20:00	II	-0.424	-0.859398	-1.146	-1.7153			29:40	II	-	-	0.524899	-0.4846	1.0508	-0.621502
	15:30:00	II	-0.4053	-0.813599	-1.0246	-1.7648			29:50	II	-	-	0.384899	-0.309998	0.5513	-0.300598
	15:40:00	II	-0.554399	-0.805298	-1.3505	-1.549			30:00	II	-	-	0.318298	-0.3922	0.7118	-0.2584
	15:50:00	II	-0.463001	-0.917698	-1.4111	-1.3025			30:10	II	-	-	0.161098	-0.324501	0.986498	-0.3591
	16:00:00	II	-0.3011	-1.0191	-1.1815	-1.4381			30:20	II	-	-	0.343597	-0.299	1.0473	-0.312401
	16:10:00	II	-0.2964	-1.2412	-0.912199	-1.4637			30:30	II	-	-	-0.0439987	-0.104	1.062	-0.175201
	16:20:00	II	-0.4252	-1.0991	-1.034	-1.4552			30:40	II	-	-	0.186298	-0.1982	0.9695	-0.3536
	16:30:00	II	-0.4888	-1.0761	-0.827702	-1.5786			30:50	II	-	-	0.0223007	-0.353703	0.9681	-0.271801
	16:40:00	II	-0.4081	-0.851097	-0.996399	-1.3566			31:00	II	-	-	0.0762024	-0.512001	1.1027	-0.189701
	16:50:00	II	-0.4415	-0.832199	-1.0836	-1.5067			31:10	II	-	-	0.153099	-0.436401	1.0581	0.195396
	17:00:00	II	-0.389101	-0.977402	-1.2124	-1.3939			31:20	II	-	-	0.1087	-0.175198	1.1223	0.282299
	17:10:00	II	-0.407902	-0.892498	-1.133	-1.5116			31:30	II	-	-	0.2551	-0.137802	0.9639	0.348
	17:20:00	II	-0.3736	-0.928802	-1.076	-1.3284			31:40	II	-	-	0.205101	-0.347801	0.812401	0.452702
	17:30:00	II	-0.241199	-0.778603	-1.1976	-1.3205			31:50	II	-	-	0.271702	-0.0977974	0.991701	0.244999
	17:40:00	II	-0.499001	-0.906002	-1.248	-1.4861			32:00	II	-	-	-0.040699	-0.1395	0.824501	0.367401
	17:50:00	II	-0.577801	-1.0493	-1.0693	-1.4903			32:10	II	-	-	0.116098	-0.1735	0.987799	0.121201
	18:00:00	II	-0.507801	-0.903198	-1.2729	-1.3147			32:20	II	-	-	0.194799	-0.221401	1.1554	-0.0255013
	18:10:00	II	-0.282101	-0.995502	-0.8547	-1.6327			32:30	II	-	-	-0.0498009	-0.1646	0.8785	0.3554
	18:20:00	II	-0.286098	-1.0876	-0.684198	-1.7553			32:40	II	-	-	0.145	-0.185402	1.1509	0.0516968
	18:30:00	II	-0.382999	-0.928902	-0.9886	-1.7859			32:50	II	-	-	0.1399	-0.182999	1.2384	0.0197029
	18:40:00	II	-0.3687	-1.1243	-0.823299	-1.9439			33:00	II	-	-	0.213999	-0.1063	1.2639	-0.0916023
	18:50:00	II	-0.422998	-1.1566	-0.898998	-1.7905			33:10	II	-	-	0.236401	-0.1978	1.2198	-0.101299
	19:00:00	II	-0.4902	-1.1032	-0.8857	-1.7964			33:20	II	-	-	0.174398	-0.1936	1.0177	-0.308399
	19:10:00	II	-0.438099	-1.2023	-0.837799	-1.9255			33:30	II	-	-	0.1644	-0.331501	1.0126	-0.283802
	19:20:00	II	-0.448601	-1.182	-0.818701	-1.6605			33:40	II	-	-	0.451799	-0.335999	1.2095	0.0192986
	19:30:00	II	-0.523399	-1.0395	-0.6579	-1.7896			33:50	II	-	-	0.379501	-0.242199	1.1124	-0.0481987
	19:40:00	II	-0.4034	-0.9417	-0.563	-1.7008			34:00	II	-	-	0.392101	-0.137798	1.2744	-0.0864983
	19:50:00	II	-0.3582	-0.9417	-0.8547	-1.6004			34:10	II	-	-	0.378901	-0.0847969	1.0675	-0.372097
	20:00:00	II	-0.4097	-0.865299	-0.919899	-1.4735			34:20	II	-	-	0.205498	-0.231201	1.0622	0.0852013
	20:10:00	II	-0.394899	-0.828102	-0.8354	-1.4563			34:30	II	-	-	0.432501	-0.196198	1.2422	0.2397
	20:20:00	II	-0.2964	-0.971302	-0.740999	-1.3358			34:40	II	-	-	0.3347	-0.119301	1.2585	-0.0852013
	20:30:00	II	-0.4711	-0.799301	-0.7549	-1.3096			34:50	II	-	-	0.0493011	-0.100201	1.1853	-0.212902
	20:40:00	II	-0.597799	-0.6768	-0.871099	-1.2472			35:00	II	-	-	0.259501	-0.295399	1.0516	-0.0363998
	20:50:00	II	-0.430601	-0.771801	-0.850801	-1.2686			35:10	II	-	-	0.378399	-0.528603	0.929899	-0.0986023
	21:00:00	II	-0.436501	-0.569401	-0.6504	-1.3126			35:20	II	-	-	0.314999	-0.559002	0.816998	0.0790977
	21:10:00	II	-0.444201	-0.690899	-0.707199	-1.2581			35:30	II	-	-	0.465801	-0.4119	1.2139	0.0198021
	21:20:00	II	-0.4156	-0.618103	-0.7456	-1.2777			35:40	II	-	-	0.743998	-0.690498	1.1032	-0.0783005
	21:30:00	II	-0.577	-0.681599	-1.0559	-1.2915			35:50	II	-	-	0.537701	-0.432102	1.1362	0.4128
	21:40:00	II	-0.6486	-0.761097	-1.034	-1.5334			36:00	II	-	-	0.522501	-0.6464	1.1424	0.164299
	21:50:00	II	-0.7778	-0.777298	-1.2175	-1.3971			36:10	II	-	-	0.261599	-0.4226	0.898298	0.2883
	22:00:00	II	-0.715601	-0.812798	-1.3057	-1.3207			36:20	II	-	-	0.120701	-0.587299	0.730801	0.0836983
	22:10:00	II	-0.711	-0.7644	-1.0404	-1.4573			36:30	II	-	-	0.461802	-0.462601	1.0819	0.147198
	22:20:00	II	-0.493399	-0.728001	-1.0346	-1.3171			36:40	II	-	-	0.372198	-0.686501	0.774698	0.0788002
	22:30:00	II	-0.4443	-0.765301	-0.652201	-1.4024			36:50	II	-	-	0.395802	-0.488602	0.753201	0.0685997
	22:40:00	II	-0.407398	-0.836102	-0.814999	-1.4272			37:00	II	-	-	0.2887	-0.446697	0.685902	0.0671005
	22:50:00	II	-0.440001	-0.813301	-0.9746	-1.4856			37:10	II	-	-	0.202003	-0.643002	0.605902	-0.0552025
	23:00:00	II	-0.5331	-0.802601	-0.9286	-1.415			37:20	II	-	-	0.101601	-0.4832	0.3386	0.00189972
	23:10:00	II	-0.521999	-0.943699	-0.946798	-1.54			37:30	II	-	-	0.160601	-0.444801	0.369299	0.189499
	23:20:00	II	-0.4466	-0.748898	-0.841101	-1.3545			37:40	II	-	-	0.0363007	-0.156601	0.269499	0.521797
	23:30:00	II	-0.607599	-0.712601	-1.0906	-1.158			37:50	II	-	-	0.0677986	0.0159988	0.3466	0.5047
	23:40:00	II	-0.550598	-0.620903	-1.1434	-0.9776			38:00	II	-	-	0.384901	-0.214703	0.4604	0.463799
	23:50:00	II	-0.503099	-0.733601	-0.771	-0.894602			38:10	II			0.416597	-0.267101	0.582098	0.438698
	24:00	II	-0.4827	-0.551601	-0.885799	-0.955101			38:20	II			0.580099	-0.190399	0.721699	0.4841
	24:10	II	-0.585999	-0.438601	-0.910599	-0.8978			38:30	II			0.360901	-0.261303	0.939798	0.504498
	24:20	II	-0.6854	-0.476299	-1.1246	-0.9305			38:40	II			0.356503	-0.3993	1.0155	0.202599
	24:30	II	-0.765499	-0.578899	-1.1636	-1.008			38:50	II			0.194599	-0.0494995	0.828499	0.329601
	24:40	II	-0.7682	-0.535801	-1.2535	-1.0585			39:00	II			0.148602	-0.241898	0.581402	0.462502
	24:50	II	-0.6682	-0.730001	-0.806799	-1.156			39:10	II			0.400099	-0.391899	0.574299	0.271202
	25:00	II	-0.761301	-0.488001	-1.0625	-1.0319			39:20	II			0.2244	-0.384499	0.852598	0.1007
	25:10	II	-0.550699	-0.529299	-0.799599	-1.0656			39:30	II			0.0980988	-0.2827	1.0278	0.0356979
	25:20	II	-0.7309	-0.396799	-1.0053	-0.9004			39:40	II			0.1147	-0.1847	0.979902	0.130402
	25:30	II	-0.757099	-0.4014	-1.0238	-1.0577			39:50	II			0.180401	-0.427299	0.981401	0.0662003
	25:40	II	-0.6369	-0.478001	-1.0008	-1.1598			40:00	II			0.415699	-0.345402	0.823999	0.351997
	25:50	II	-0.6814	-0.351801	-1.0029	-1.2347			40:10	II			0.215302	-0.436798	0.956701	0.0340004
	26:00	II	-0.559099	-0.273602	-0.990601	-1.165			40:20	II			0.270798	-0.372799	0.949799	0.0104027
	26:10	II	-0.6332	-0.362701	-0.798801	-1.2717			40:30	II			0.197498	-0.332703	1.0687	0.00370026
	26:20	II	-0.6488	-0.319599	-0.951	-1.2452			40:40	II			0.273001	-0.334702	1.0115	-0.00679779
	26:30	II	-0.4706	-0.2521	-0.8797	-0.986			40:50	II			0.233597	-0.538799	1.0278	-0.094799
	26:40	II	-0.5242	-0.2302	-0.9233	-0.922699
	26:50	II	-0.4862	-0.2661	-1.0819	-0.8741
	27:00	II	-0.5919	-0.138901	-1.1293	-0.76
	27:10	II	-0.3564	-0.367102	-0.959	-1.0577
	27:20	II	-0.462601	-0.280199	-0.863199	-1.1175
	27:30	II	-0.404699	-0.3169	-0.937901	-1.2249
	27:40	II	-0.368401	-0.293499	-1.005	-1.0684
	27:50	II	-0.4478	-0.2763	-0.8109	-1.1519
	28:00	II	-0.356501	-0.2127	-0.7586	-0.9762
	28:10	II	-0.3153	-0.272699	-0.7551	-0.9366
	28:20	II	-0.4361	-0.240299	-1.0504	-0.966099
	28:30	II	-0.376701	-0.290199	-0.9326	-1.1125
	28:40	II	-0.375401	-0.331902	-1.1524	-1.055
	28:50	II	-0.317499	-0.5348	-1.1677	-1.2038
	29:00	II	-0.307199	-0.551201	-1.0958	-1.1665
	29:10	II	-0.455	-0.410002	-1.1156	-1.0589
	29:20	II	-0.521101	-0.4485	-0.971601	-1.1974
	29:30	II	-0.512602	-0.3568	-1.0862	-0.984701
	29:40	II	-0.639101	-0.296999	-1.2812	-1.0011
	29:50	II	-0.470999	-0.479099	-1.1618	-1.137
	30:00	II	-0.5695	-0.3633	-1.1441	-1.0628
	30:10	II	-0.667099	-0.292599	-0.974199	-1.1939
	30:20	II	-0.5641	-0.207201	-0.981201	-1.0173
	30:30	II	-0.5495	-0.326	-1.0072	-1.0755
	30:40	II	-0.564301	-0.3421	-0.9093	-1.1461
	30:50	II	-0.507099	-0.3113	-0.7621	-1.1914
	31:00	II	-0.513901	-0.1453	-0.534401	-1.0905
	31:10	II	-0.507599	-0.1112	-0.7813	-1.0333
	31:20	II	-0.740601	0.0477009	-0.9501	-0.829498
	31:30	II	-0.646898	-0.116201	-0.7097	-0.654301
	31:40	II	-0.6511	0.0667992	-0.906301	-0.3382
	31:50	II	-0.5697	-0.0837994	-1.0157	-0.253
	32:00	II	-0.5625	-0.1129	-1.3047	-0.371201
	32:10	II	-0.468601	-0.192301	-1.0373	-0.0723
	32:20	II	-0.658899	-0.2425	-0.9603	-0.6227
	32:30	II	-0.710499	-0.146101	-1.2146	-0.3379
	32:40	II	-0.651901	-0.168001	-1.2186	-0.335001
	32:50	II	-0.7225	-0.2652	-1.4542	-0.472801
	33:00	II	-0.638399	-0.148199	-1.3399	-0.264999
	33:10	II	-0.618	-0.2274	-1.5269	-0.247501
	33:20	II	-0.572199	-0.272301	-1.2781	-0.249401
	33:30	II	-0.4478	-0.361801	-1.0969	-0.286501
	33:40	II	-0.5867	-0.3298	-1.0596	-0.521799
	33:50	II	-0.6388	-0.451799	-1.1234	-0.590799
	34:00	II	-0.538401	-0.3771	-0.844801	-0.4893
	34:10	II	-0.637001	-0.445601	-1.289	-0.302101
	34:20	II	-0.424601	-0.365301	-0.996799	-0.2274
	34:30	II	-0.395201	-0.401701	-0.881201	-0.3092
	34:40	II	-0.4002	-0.4081	-0.858299	-0.389801
	34:50	II	-0.411301	-0.560299	-0.867401	-0.492599
	35:00	II	-0.3529	-0.458601	-0.822201	-0.369301
	35:10	II	-0.366701	-0.4221	-0.889601	-0.4974
	35:20	II	-0.4191	-0.355801	-1.1226	-0.782301
	35:30	II	-0.426201	-0.326599	-1.012	-0.590399
	35:40	II	-0.430199	-0.4538	-1.093	-0.6462
	35:50	II	-0.3988	-0.363899	-0.931801	-0.705799
	36:00	II	-0.493401	-0.439501	-1.1116	-0.6192
	36:10	II	-0.531799	-0.3029	-1.0778	-0.704
	36:20	II	-0.6553	-0.188099	-1.4241	-0.368198
	36:30	II	-0.368801	-0.193201	-1.2537	-0.531799
	36:40	II	-0.244699	-0.3584	-1.103	-0.364599
	36:50	II	-0.300501	-0.352098	-1.2027	-0.557098
	37:00	II	-0.3566	-0.305799	-1.2474	-0.354799
	37:10	II	-0.268	-0.3344	-1.2165	-0.467901
	37:20	II	-0.2855	-0.3374	-1.3272	-0.350101
	37:30	II	-0.178101	-0.427	-1.106	-0.433701
	37:40	II	-0.219099	-0.4137	-1.3558	-0.410801
	37:50	II	0.1348	-0.5359	-0.845501	-0.370901
	38:00	II	0.1161	-0.480499	-0.655901	-0.0936985
	38:10	II	-0.0571003	-0.3144	-0.8298	-0.277899
	38:20	II	0.0613995	-0.323099	-0.720001	-0.264299
	38:30	II	0.0214005	-0.389099	-0.8048	-0.398399
	38:40	II	-0.0876999	-0.384499	-0.8808	-0.471899
	38:50	II	-0.0642986	-0.431801	-0.9676	-0.350601
	39:00	II	-0.0306988	-0.3444	-0.7992	-0.3475
	39:10	II	0.0447998	-0.3503	-0.771299	-0.5135
	39:20	II	0.0262012	-0.3218	-0.579699	-0.4258
	39:30	II	0.0845013	-0.3181	-0.5721	-0.5091
	39:40	II	0.0848999	-0.357901	-0.4202	-0.470499
	39:50	II	0.1024	-0.3619	-0.675901	-0.413399
	40:00	II	-0.0755005	-0.2777	-0.887199	-0.3048
	40:10	II	-0.0628014	-0.167	-0.9016	-0.333399
	40:20	II	-0.0946999	-0.114399	-0.786001	-0.2677
	40:30	II	-0.2677	-0.110901	-0.876101	-0.2444
	40:40	II	-0.0478992	-0.173399	-0.7677	-0.350199
	40:50	II	-0.127899	-0.190401	-0.8911	-0.357901
