# Supplementary material for: Live imaging of hair bundle polarity acquisition demonstrates a critical timeline for transcription factor Emx2
Source: eLife. 2020 Sep 23;9:e59282. doi: 10.7554/eLife.59282 (PMC7535933; doi:10.7554/eLife.59282)
Supplement: Figure 3—figure supplement 2—source data 1. [file elife-59282-fig3-figsupp2-data1.xlsx]

## Sheet: Sheet1
	Figure 3--figure supplement 2--source data 1
	Coordinates of centriole positions relative to the center of the HC in Md HC5, Md HC6, and Md HC7.
	Md HC5						Md HC6						Md HC7
	Time (hr:min)	MC-X relative to the center of the cell (μm)	MC-Y relative to the center of the cell (μm)	DC-X relative to the center of the cell (μm)	DC-Y relative to the center of the cell (μm)		Time (hr:min)	MC-X relative to the center of the cell (μm)	MC-Y relative to the center of the cell (μm)	DC-X relative to the center of the cell (μm)	DC-Y relative to the center of the cell (μm)		Time (hr:min)	MC-X relative to the center of the cell (μm)	MC-Y relative to the center of the cell (μm)	DC-X relative to the center of the cell (μm)	DC-Y relative to the center of the cell (μm)
	00:00:00	-1.0791	0.0354996	-1.81371	0.6768		00:00:00	0.226398	0.357401	0.397499	0.9557		00:00:00	-0.718094	-0.295597	-1.38309	-0.717697
	00:10:00	-0.823196	-0.376099	-1.2266	0.5993		00:10:00	0.101299	0.4431	0.322899	1.0788		00:10:00	-0.780502	-0.300404	-1.3045	-0.666203
	00:20:00	-0.715401	-0.1045	-0.814499	0.692799		00:20:00	0.107304	0.4193	-0.056797	1.1049		00:20:00	-0.765198	-0.236801	-1.406	-0.864601
	00:30:00	-0.574203	-0.4533	-0.3451	0.435402		00:30:00	-0.0639	0.5641	-0.374699	1.2563		00:30:00	-1.004	-0.291397	-1.4295	-0.823399
	00:40:00	-0.757103	-0.347599	-0.998299	0.5214		00:40:00	-0.0503998	0.7444	-0.434399	1.1907		00:40:00	-0.850998	-0.343601	-1.3054	-0.785698
	00:50:00	-0.669006	-0.4566	-0.234802	0.4678		00:50:00	0.191799	0.590099	0.0465012	1.3144		00:50:00	-1.0771	-0.247097	-1.3028	-0.674297
	01:00:00	-0.419098	-0.218597	-0.2817	0.459		01:00:00	0.16	0.749201	-0.1744	1.2692		01:00:00	-1.3214	-0.319103	-1.4253	-0.6926
	01:10:00	-0.452599	-0.3582	-0.219597	0.325199		01:10:00	0.00110245	0.736601	-0.619598	1.225		01:10:00	-1.1413	-0.349197	-1.5808	-0.624199
	01:20:00	-0.658798	-0.260902	-0.448303	0.807999		01:20:00	-0.244598	0.777199	0.125603	1.4785		01:20:00	-1.028	-0.336903	-1.1914	-0.616703
	01:30:00	-0.544701	-0.319202	0.0606003	0.582798		01:30:00	-0.158001	0.576601	0.448799	1.2497		01:30:00	-0.932503	-0.218899	-1.2834	-0.5257
	01:40:00	-0.590004	-0.523197	-0.122101	0.0481033		01:40:00	-0.271099	0.503201	0.00540161	1.3782		01:40:00	-1.0279	-0.160503	-1.577	-0.627403
	01:50:00	-0.692101	-0.429798	-0.192497	0.249401		01:50:00	-0.314499	0.568901	0.254601	1.4842		01:50:00	-0.893501	-0.104301	-1.11861	-0.8083
	02:00:00	-0.760902	-0.227001	-0.586403	0.386299		02:00:00	-0.2701	0.623301	0.0480995	1.442		02:00:00	-0.952797	-0.123001	-1.0044	-0.839703
	02:10:00	-0.632103	0.073101	-0.819801	0.531601		02:10:00	-0.362499	0.9389	0.206802	1.4808		02:10:00	-0.813805	0.0180016	-0.964806	-0.688698
	02:20:00	-0.419098	0.014698	-0.9888	0.490799		02:20:00	-0.319698	0.605801	0.282402	1.4024		02:20:00	-0.875198	-0.0774994	-0.716599	-0.741699
	02:30:00	-0.475296	0.144699	-0.865295	0.854301		02:30:00	-0.418701	0.805601	0.155899	1.5408		02:30:00	-0.927696	-0.0722008	-1.38	-0.901398
	02:40:00	-0.383202	-0.121502	-0.632202	0.577		02:40:00	-0.2924	0.501101	0.3503	1.3964		02:40:00	-0.912201	0.1698	-1.3894	-0.579102
	02:50:00	-0.466293	0.00320053	-0.886299	0.448399		02:50:00	-0.547203	0.6441	0.470497	1.1936		02:50:00	-0.967896	0.0670013	-1.6254	-1.2732
	03:00:00	-0.750404	0.182503	-0.478355	0.8514		03:00:00	-0.629898	0.4086	0.509102	0.900702		03:00:00	-0.887802	0.129402	-1.3011	-0.577698
	03:10:00	-0.251305	0.0704994	-0.215004	0.880199		03:10:00	-0.359901	0.3377	0.5452	0.977999		03:10:00	-0.9599	0.132999	-1.5399	-0.4324
	03:20:00	-0.378799	-0.266201	-0.362801	0.5107		03:20:00	-0.273598	0.497499	0.506802	1.1313		03:20:00	-0.953499	0.3657	-1.5458	-0.572498
	03:30:00	-0.418503	-0.236	-0.273903	0.596199		03:30:00	-0.366497	0.526499	0.720501	1.0154		03:30:00	-1.0258	0.2103	-1.5509	-0.634399
	03:40:00	-0.372803	-0.154301	-0.473503	0.608803		03:40:00	-0.368301	0.558599	0.596699	1.1516		03:40:00	-0.980293	0.301498	-1.3378	-0.481003
	03:50:00	-0.329895	-0.247303	-0.327202	0.366699		03:50:00	-0.4324	0.597	0.6679	0.8223		03:50:00	-0.784798	0.438198	-1.4109	-0.5513
	04:00:00	-0.0567017	-0.299198	-0.598198	0.266899		04:00:00	-0.427498	0.5296	0.685802	0.739401		04:00:00	-0.894997	0.306099	-1.5999	0.143101
	04:10:00	-0.106995	-0.270302	-0.597397	0.394798		04:10:00	-0.400398	0.708899	1.0362	0.947699		04:10:00	-0.907898	0.2286	-1.46899	0.498398
	04:20:00	0.0838013	0.107903	-0.577698	0.1637		04:20:00	-0.154102	0.7848	1.1192	0.608301		04:20:00	-0.763702	0.3652	-1.4558	-0.1441
	04:30:00	0.0139999	0.0471001	-0.969498	-0.0842018		04:30:00	0.153397	0.858	1.1922	0.223		04:30:00	-0.7509	0.3731	-1.2502	-0.563198
	04:40:00	-0.222496	-0.2015	-0.6828	0.6054		04:40:00	0.117901	0.7311	0.9823	0.442699		04:40:00	-0.694603	0.282402	-0.864304	-0.2379
	04:50:00	0.0446014	-0.236099	-0.681503	0.395199		04:50:00	0.0583	0.8911	0.966499	0.591		04:50:00	-0.674202	0.181698	-1.1944	-0.3438
	05:00:00	-0.297195	0.0593987	-0.284996	0.886398		05:00:00	0.0152016	0.8512	1.1265	0.376699		05:00:00	-1.0958	0.2369	-1.5185	-0.327198
	05:10:00	0.0485992	-0.100201	-0.271202	0.329098		05:10:00	0.306499	0.654202	1.2766	0.0606003		05:10:00	-1.3032	0.102798	-1.5289	-0.689503
	05:20:00	-0.0845947	-0.0249977	-0.616501	0.165302		05:20:00	0.2696	0.4653	1.3134	0.393499		05:20:00	-1.2628	0.209	-1.5585	-1.1388
	05:30:00	-0.0614014	0.106998	-0.7826	0.2085		05:30:00	0.360298	0.2696	1.3306	0.848		05:30:00	-1.2026	0.239304	-1.142	-0.4161
	05:40:00	-0.322899	-0.0808983	-0.8666	-0.365997		05:40:00	0.133602	0.321999	1.2353	0.5751		05:40:00	-1.2818	0.0679016	-1.2725	-0.179298
	05:50:00	-0.309296	0.2174	-0.436897	-0.417301		05:50:00	0.336899	0.447599	1.3381	0.370199		05:50:00	-1.0348	0.0285988	-0.882202	-0.296501
	06:00:00	-0.476501	0.179199	-0.477905	-0.222301		06:00:00	0.523399	0.628901	1.4436	0.595301		06:00:00	-0.944298	-0.1693	-1.2946	-0.304897
	06:10:00	-0.654106	0.252201	-0.390907	-0.0594978		06:10:00	0.5676	0.478699	1.4054	0.6143		06:10:00	-0.952003	-0.0111008	-1.1627	-0.427902
	06:20:00	-0.639503	0.1017	0.0177002	-0.0715027		06:20:00	1.15	0.7206	1.7018	0.455801		06:20:00	-0.599098	-0.236698	-0.793205	-0.644001
	06:30:00	-0.3666	-0.172398	0.259605	-0.512398		06:30:00	1.0598	0.5168	1.7341	0.518		06:30:00	-0.620102	-0.119598	-0.847504	-0.901199
	06:40:00	-0.236504	-0.312	0.162094	-0.523003		06:40:00	1.0101	0.5867	1.6799	0.409101		06:40:00	-0.667801	-0.1917	-0.757996	-0.8605
	06:50:00	-0.0887985	-0.1525	0.3153	-0.4007		06:50:00	1.4101	0.577002	1.9706	0.0789013		06:50:00	-0.805504	-0.2864	-1.3884	-0.6367
	07:00:00	-0.166306	-0.201302	0.0401001	-0.415703		07:00:00	1.2569	0.5016	1.6093	0.162899		07:00:00	-0.4869	-0.321899	-0.913498	-0.865299
	07:10:00	-0.0597992	-0.148098	0.0666962	-0.617901		07:10:00	1.3788	0.3736	1.806	-0.115999		07:10:00	-0.163506	-0.488701	-0.608803	-0.935501
	07:20:00	0.00219727	-0.148003	0.597397	-0.402		07:20:00	1.3264	0.4237	1.842	-0.1373		07:20:00	-0.271294	-0.270199	-0.517197	-0.513599
	07:30:00	-0.00749969	-0.308498	0.567001	-0.521801		07:30:00	1.2117	0.413401	1.7824	-0.0503998		07:30:00	-0.316902	-0.3601	-0.584	-0.621799
	07:40:00	-0.0871964	0.0894012	0.548401	0.120998		07:40:00	1.4084	0.6527	1.8434	0.00780106		07:40:00	-0.177505	-0.400303	-0.4953	-0.589203
	07:50:00	0.0896988	-0.313499	0.940102	-0.325901		07:50:00	1.3293	0.5627	1.8083	-0.0725002		07:50:00	-0.168701	-0.161797	-0.169701	-0.556
	08:00:00	0.1362	-0.189899	0.804604	0.122101		08:00:00	1.4188	0.636101	2.1159	-0.1369		08:00:00	0.0342941	-0.256001	-0.0779037	-0.734402
	08:10:00	0.314804	-0.377399	0.166504	0.469902		08:10:00	1.378	0.567099	1.9489	-0.246		08:10:00	-0.186996	-0.483902	-0.214996	-0.937901
	08:20:00	0.451698	-0.2775	0.365898	0.529602		08:20:00	1.0335	0.4375	1.6954	-0.1954		08:20:00	-0.117699	-0.330299	-0.547501	-0.823597
	08:30:00	0.271698	-0.150398	0.682503	0.357201		08:30:00	1.0376	0.482601	1.8987	-0.2864		08:30:00	-0.171997	-0.517399	-0.521599	-0.940399
	08:40:00	0.295403	0.1446	0.799805	0.608002		08:40:00	1.0813	0.5814	1.808	-0.0251999		08:40:00	0.103699	-0.366798	-0.600601	-0.422699
	08:50:00	0.351601	-0.129898	0.5802	0.764099		08:50:00	1.1214	0.4076	1.9968	0.0820007		08:50:00	-0.312698	-0.821899	-0.956001	-0.951302
	09:00:00	0.644096	-0.4645	1.0544	0.256901		09:00:00	0.988602	0.224501	1.7426	-0.0513992		09:00:00	-0.0657959	-0.844597	-0.8181	-1.0558
	09:10:00	0.837708	-0.279198	0.867607	0.5756		09:10:00	0.862602	0.446301	1.73	-0.2206		09:10:00	-0.418304	-0.623501	-0.999001	-1.1648
	09:20:00	0.907394	-0.2034	1.0032	0.655399		09:20:00	1.2015	0.230499	2.0522	-0.1576		09:20:00	-0.2565	-0.765499	-0.697403	-0.808701
	09:30:00	0.803001	-0.265202	1.0048	0.6185		09:30:00	0.994904	0.491899	1.8183	0.188		09:30:00	-0.465195	-0.655701	-0.381401	-0.311699
	09:40:00	0.638496	-0.103798	1.0281	0.483803		09:40:00	0.9809	0.5131	1.8599	0.2925		09:40:00	-0.0334015	-0.5481	-0.586502	-0.382999
	09:50:00	0.656898	0.1166	1.0993	0.391403		09:50:00	0.905899	0.365299	1.9408	0.0702991		09:50:00	-0.262199	-0.745098	-0.783699	-0.0858002
	10:00:00	0.626198	0.0950012	1.3009	0.3452		10:00:00	0.980202	0.272499	1.6916	0.135599		10:00:00	-0.253304	-0.839199	-0.630203	-0.785999
	10:10:00	0.674904	-0.0537987	0.942604	0.571003		10:10:00	0.9002	0.380999	1.6476	0.365		10:10:00	-0.303398	-0.895699	-0.394897	-0.274399
	10:20:00	0.688995	-0.0180016	1.16679	0.261501		10:20:00	0.864799	0.260201	1.6053	0.0184994		10:20:00	-0.485001	-0.926701	-0.929298	-1.0279
	10:30:00	0.817604	-0.0820999	1.1714	0.618198		10:30:00	0.998001	0.231699	1.6934	0.0548		10:30:00	-0.607002	-0.897301	-0.301003	-0.694302
	10:40:00	0.882797	-0.117802	0.712898	0.696598		10:40:00	0.703499	0.1273	1.5411	0.0385017		10:40:00	-0.740196	-1.1223	-0.817894	-0.449501
	10:50:00	0.652199	-0.147404	0.710999	0.564796		10:50:00	0.6618	0.254	1.6783	0.0100994		10:50:00	-0.574104	-1.2166	-1.0417	-0.538601
	11:00:00	0.854996	-0.109798	0.8396	0.565998		11:00:00	0.654598	0.231199	1.5497	-0.0695019		11:00:00	-0.671303	-1.2495	-0.923599	-0.6171
	11:10:00	0.758995	0.286598	0.975197	0.469799								11:10:00	-0.7705	-1.2648	-0.555702	-0.661102
	11:20:00	0.739204	0.1161	0.864998	0.690201								11:20:00	-0.686104	-1.1714	-0.534302	-0.682999
	11:30:00	0.839905	-0.169498	1.0608	0.297501								11:30:00	-0.576599	-1.1089	-0.401001	-0.723198
	11:40:00	0.964203	-0.3423	1.0393	0.253101								11:40:00	-0.484207	-1.1262	-0.639702	-0.845901
	11:50:00	1.1022	-0.1222	1.5101	0.219398								11:50:00	-0.343201	-1.1329	-0.552795	-1.1286
	12:00:00	1.0509	-0.393703	1.1267	0.2906								12:00:00	-0.421906	-1.2109	-0.461502	-1.5164
	12:10:00	1.2104	-0.251701	1.2662	0.360001								12:10:00	-0.345703	-1.0243	-0.552803	-1.8052
	12:20:00	1.0042	-0.172901	1.26379	0.518898								12:20:00	-0.212204	-1.1105	0.0262985	-1.4903
	12:30:00	1.1218	-0.351601	1.3353	0.324299								12:30:00	-0.302696	-1.3241	0.0899963	-1.4899
	12:40:00	1.1218	-0.1581	1.2544	0.523098								12:40:00	-0.0149994	-1.064	0.023201	-1.4157
	12:50:00	0.889503	-0.431999	1.1399	0.415501								12:50:00	0.0325012	-1.2674	0.0100021	-1.5519
	13:00:00	1.209	-0.475101	1.443	0.327599								13:00:00	0.114899	-1.114	0.121796	-1.5317
	13:10:00	1.0872	-0.3717	1.3377	0.345001								13:10:00	0.105499	-1.0648	0.276001	-1.5203
	13:20:00	1.0082	-0.355	1.4517	0.0461006								13:20:00	0.0187988	-1.1663	0.201096	-1.599
	13:30:00	1.1357	-0.294201	1.1914	0.388								13:30:00	0.341698	-1.106	0.2696	-1.5028
	13:40:00	0.998199	-0.393002	1.0015	0.416798								13:40:00	0.0643997	-1.3214	0.216202	-1.5401
	13:50:00	0.981201	-0.151897	1.2086	0.273903								13:50:00	0.2547	-1.2104	0.348694	-1.287
	14:00:00	1.3211	-0.197498	1.4155	0.1772								14:00:00	0.288399	-1.045	0.482498	-1.0313
	14:10:00	0.930504	-0.347797	1.1715	0.4589								14:10:00	0.189705	-0.771301	0.637405	-0.992802
	14:20:00	0.9851	-0.342899	1.3876	0.5434								14:20:00	0.1101	-0.911102	0.765106	-1.1031
	14:30:00	1.0588	-0.281002	1.0722	0.558601								14:30:00	0.263802	-0.770199	0.657799	-0.968498
	14:40:00	1.2524	-0.6138	1.4666	0.285801								14:40:00	0.166504	-0.878998	0.581406	-0.9702
	14:50:00	1.2355	-0.428699	1.236	0.551899								14:50:00	0.401497	-0.902199	0.758598	-0.881001
	15:00:00	1.34959	-0.239002	1.24429	0.393101								15:00:00	0.384796	-0.703899	0.8675	-0.876598
	15:10:00	1.2159	-0.4179	1.2986	0.4212								15:10:00	0.465904	-0.766098	0.819801	-0.9716
	15:20:00	1.13911	-0.3414	1.3582	0.5215								15:20:00	0.305801	-0.7155	0.879196	-1.0245
	15:30:00	1.3204	-0.288197	1.5352	0.362003								15:30:00	0.3237	-0.7644	0.8069	-0.9706
	15:40:00	1.3018	-0.306499	1.5566	0.195602								15:40:00	0.394295	-0.706398	0.864601	-0.8354
	15:50:00	1.08401	-0.432999	1.5603	0.0446014								15:50:00	0.381104	-0.702202	0.908104	-0.716801
	16:00:00	1.03291	-0.6805	1.2683	0.176498								16:00:00	0.553101	-0.8493	0.989296	-0.8881
	16:10:00	1.2712	-0.571503	1.3748	0.215797								16:10:00	0.760994	-0.664402	1.1791	-0.6567
	16:20:00	1.3297	-0.780598	1.1654	-0.069397								16:20:00	0.699203	-0.590702	1.0631	-0.622902
	16:30:00	1.0805	-0.7547	1.4966	-0.040699								16:30:00	0.7444	-0.628601	1.1109	-0.8176
													16:40:00	0.412605	-0.7215	0.839905	-0.918102
													16:50:00	0.729996	-0.628101	1.0088	-1.0191
													17:00:00	0.801796	-0.461498	1.0729	-1.1051
													17:10:00	0.553596	-0.491802	0.912201	-1.0233
													17:20:00	0.873703	-0.408699	1.039	-1.0295
													17:30:00	0.800697	-0.4561	0.948204	-0.9786
													17:40:00	0.770096	-0.724003	0.808701	-1.2762
													17:50:00	0.735695	-0.731197	0.953896	-1.0264
													18:00:00	1.0273	-0.674603	1.0584	-1.0944
													18:10:00	0.948402	-0.7225	0.9347	-1.065
