# Supplementary material for: Live imaging of hair bundle polarity acquisition demonstrates a critical timeline for transcription factor Emx2
Source: eLife. 2020 Sep 23;9:e59282. doi: 10.7554/eLife.59282 (PMC7535933; doi:10.7554/eLife.59282)
Supplement: Figure 3—source data 1. [file elife-59282-fig3-data1.xlsx]

## Sheet: Sheet1
	Figure 3--source data 1
	Coordinates of centriole positions relative to the center of the cell in Md HC2, Md HC3, and Md HC4.
	Md HC2							Md HC3						Md HC4
	Time (hr:min)	Phase	MC-X relative to the center of the cell (μm)	MC-Y relative to the center of the cell (μm)	DC-X relative to the center of the cell (μm)	DC-Y relative to the center of the cell (μm)		Time (hr:min)	MC-X relative to the center of the cell (μm)	MC-Y relative to the center of the cell (μm)	DC-X relative to the center of the cell (μm)	DC-Y relative to the center of the cell (μm)		Time (hr:min)	MC-X relative to the center of the cell (μm)	MC-Y relative to the center of the cell (μm)	DC-X relative to the center of the cell (μm)	DC-Y relative to the center of the cell (μm)
	00:00:00	I	-0.73839	0.0834198	-0.45769	-0.78525		00:00:00	0.408199	-0.246401	0.955299	0.2929		00:00:00	1.10101	0.5886	0.463005	0.833799
	00:10:00	I	-0.8012	-0.10669	-0.39176	-0.84314		00:10:00	0.0612011	-0.0552998	0.113001	-0.6658		00:10:00	0.978996	0.635599	0.382996	0.939499
	00:20:00	I	-0.90921	-0.10012	-0.33027	-0.69145		00:20:00	-0.1262	-0.103901	0.2964	-0.384501		00:20:00	0.962006	0.664701	0.363998	1.0965
	00:30:00	I	-0.90306	-0.16077	-0.32418	-0.65509		00:30:00	0.0263996	-0.382502	0.197899	-0.2064		00:30:00	0.854996	0.598	0.362	1.0301
	00:40:00	I	-0.75684	-0.26072	-0.30999	-0.69941		00:40:00	0.2227	-0.375799	0.493	-0.0946999		00:40:00	0.875	0.576099	0.379997	1.1037
	00:50:00	I	-0.81946	-0.27177	-0.61171	-0.75805		00:50:00	-0.0258999	-0.329901	0.1626	-0.478901		00:50:00	0.791	0.559801	0.285004	0.985901
	01:00:00	I	-0.86029	-0.2044	-0.57456	-0.75566		01:00:00	0.1889	-0.2854	0.5907	-0.686201		01:00:00	0.687996	0.597	0.328003	0.828699
	01:10:00	I	-0.69222	-0.37881	-0.71684	-0.85655		01:10:00	0.342899	-0.281599	0.721399	-0.0583		01:10:00	0.898003	0.698299	0.453003	0.8752
	01:20:00	I	-0.51965	-0.23798	-0.65605	-0.71731		01:20:00	-0.0291996	-0.2971	-0.387499	-0.586899		01:20:00	0.812996	0.660398	0.418999	0.9016
	01:30:00	I	-0.68736	-0.18948	-0.5089	0.0741899		01:30:00	0.0816994	-0.2994	0.1077	-0.202101		01:30:00	0.808998	1.0223	0.409004	0.8995
	01:40:00	I	-0.41326	-0.29233	-0.54235	0.08201		01:40:00	-0.0923996	-0.310801	0.209299	-0.624399		01:40:00	0.611	0.730499	0.504005	0.7831
	01:50:00	I	-0.54134	-0.56468	-0.45669	0.15486		01:50:00	-0.120399	-0.319801	0.0757999	-0.7117		01:50:00	0.630005	0.668699	0.0500031	1.0712
	02:00:00	I	-0.62306	-0.46339	-0.54356	0.12094		02:00:00	0.303598	-0.443399	0.3566	-1.1115		02:00:00	0.417	0.819201	0.273003	0.8678
	02:10:00	I	-0.48806	-0.35878	-0.65998	0.0854101		02:10:00	-0.0139999	-0.2248	0.2451	-0.6259		02:10:00	0.420998	0.817501	0.167999	0.840099
	02:20:00	I	-0.59608	-0.33074	-0.92509	-0.00580001		02:20:00	0.0139999	-0.441999	0.540901	-0.501699		02:20:00	0.324997	0.7883	-0.0690002	0.7118
	02:30:00	I	-0.55557	-0.52829	-0.712	-0.37224		02:30:00	-0.0755997	-0.3839	-0.0376987	-0.558199		02:30:00	0.537994	0.6791	-0.234001	0.530701
	02:40:00	I	-0.35683	-0.35972	-0.31625	-0.23814		02:40:00	0.00190163	-0.2192	0.307201	0.0737		02:40:00	0.415001	0.675301	-0.362	0.4781
	02:50:00	I	-0.2585	-0.33252	-0.21221	-0.12163		02:50:00	-0.126101	-0.1366	0.343699	0.424799		02:50:00	0.342003	0.683399	-0.261002	0.6819
	03:00:00	I	-0.33028	-0.09027	-0.52976	-0.42295		03:00:00	0.130798	-0.289499	0.0815983	0.1478		03:00:00	0.573997	0.7778	-0.234001	0.658501
	03:10:00	I	-0.25329	-0.10129	-0.37195	-0.21716		03:10:00	0.197899	-0.1556	-0.260601	0.7705		03:10:00	0.431999	0.7586	-0.249001	0.746199
	03:20:00	I	-0.38911	-0.24061	-0.48374	-0.0197001		03:20:00	0.0606003	-0.2379	0.450199	-0.528198		03:20:00	0.386002	0.6761	-0.464996	0.744301
	03:30:00	I	-0.23082	0.00053978	-0.43844	0.13709		03:30:00	0.0694008	-0.4993	0.606701	-0.311701		03:30:00	0.346001	0.5616	-0.523994	0.662899
	03:40:00	I	-0.44243	-0.17068	-0.74615	-0.32155		03:40:00	0.0915012	-0.409401	-0.6164	-0.5056		03:40:00	0.350998	0.4564	-0.543999	0.585001
	03:50:00	I	-0.42628	-0.000639915	-0.58357	-0.2022		03:50:00	0.120001	-0.598301	0.3606	-0.5975		03:50:00	0.478004	0.509001	-0.410995	0.5641
	04:00:00	I	-0.32405	-0.0282798	-0.66677	-0.11148		04:00:00	0.1581	-0.492201	0.8678	-0.312901		04:00:00	0.287003	0.5259	-0.603996	0.5882
	04:10:00	I	-0.26982	-0.0230999	-1.01846	-0.42996		04:10:00	0.0720997	-0.4202	0.4177	-0.258902		04:10:00	0.340004	0.435001	-0.586998	0.6511
	04:20:00	I	-0.238999	0.0112801	-0.63202	-0.71503		04:20:00	0.131401	-0.433701	0.1245	-0.3064		04:20:00	0.408005	0.355301	-0.671997	0.7285
	04:30:00	I	-0.25235	-0.0465202	-0.834411	-0.2187		04:30:00	0.403099	-0.2195	0.5681	-0.0376987		04:30:00	0.342995	0.461399	-0.616005	0.7302
	04:40:00	I	-0.4257	0.0391202	-0.934319	0.29601		04:40:00	0.114401	-0.334499	0.3304	-0.233		04:40:00	0.438004	0.2306	-0.389	0.416899
	04:50:00	I	-0.41531	0.0935397	-1.02371	0.29159		04:50:00	0.252399	-0.3542	0.252399	-0.0314007		04:50:00	0.357002	0.4046	-0.389999	0.5564
	05:00:00	II	-0.41846	-0.00122023	-1.13491	0.2339		05:00:00	-0.0289993	-0.110001	0.187	-0.335501		05:00:00	0.418999	0.487801	-0.537003	0.3867
	05:10:00	II	-0.26772	-0.0601401	-0.77686	-0.13345		05:10:00	0.121	-0.0907001	0.121	-0.1343		05:10:00	0.397003	0.454599	-0.417999	0.1528
	05:20:00	II	-0.28059	0.00213003	-1.00876	-0.15881		05:20:00	0.122101	-0.00250053	-0.0938988	-0.1866		05:20:00	0.5	0.6327	0.112999	-0.00899887
	05:30:00	II	-0.3209	-0.0592399	-1.35909	-0.39979		05:30:00	-0.036499	0.1527	0.3955	0.6115		05:30:00	0.628006	0.626902	0.496002	0.2728
	05:40:00	II	-0.0121698	0.20233	-0.868839	-0.0127401		05:40:00	0.283998	0.0244007	0.716	0.1901		05:40:00	0.452995	0.5875	0.220993	0.5478
	05:50:00	II	-0.389859	0.15812	-1.02572	0.26203		05:50:00	0.202299	-0.0153008	0.8503	0.393599		05:50:00	0.438004	0.550499	-0.267998	0.135
	06:00:00	II	-0.34694	-0.15878	-0.9928	-0.40927		06:00:00	0.298599	-0.1418	0.7306	0.259499		06:00:00	0.497002	0.5287	0.307999	-0.234701
	06:10:00	II	-0.10468	-0.19689	-0.939659	-0.20494		06:10:00	0.445002	0.0566006	0.877001	0.4172		06:10:00	0.432999	0.6022	-0.493004	0.275801
	06:20:00	II	-0.31628	-0.0495601	-0.64433	0.0591302		06:20:00	0.2761	-0.0825005	0.924101	0.335899		06:20:00	0.395996	0.397299	-0.375	0.4487
	06:30:00	II	-0.17498	0.0893602	-0.610229	-0.0669899		06:30:00	0.368301	0.130201	1.0163	0.342201		06:30:00	0.400002	0.397501	-0.481003	0.573601
	06:40:00	II	-0.254641	-0.16709	-0.70573	-0.18092		06:40:00	0.430901	0.2213	0.8629	0.2075		06:40:00	0.32	0.230902	-0.425003	0.280201
	06:50:00	II	-0.18167	-0.0310802	-0.98826	-0.0518498		06:50:00	0.4848	-0.0534	1.1328	-0.1003		06:50:00	0.347	0.147299	-0.473999	0.8174
	07:00:00	II	-0.15596	-0.00963974	-0.757151	0.16192		07:00:00	0.319099	-0.1894	0.9671	-0.0224991		07:00:00	0.429001	0.1399	-0.354996	0.6929
	07:10:00	II	-0.324221	0.0515699	-0.73773	-0.0334001		07:10:00	0.547701	-0.0831985	0.7637	-0.278999		07:10:00	0.350998	0.146301	-0.213005	0.866301
	07:20:00	II	-0.27281	0.03863	-0.70722	-0.31338		07:20:00	0.384499	-0.0929012	0.8165	0.3594		07:20:00	0.192001	0.129099	-0.392998	0.572599
	07:30:00	II	-0.348721	-0.13996	-0.73077	-0.57349		07:30:00	0.201	0.123201	0.849001	0.538301		07:30:00	0.367996	0.1586	0.00499725	0.659599
	07:40:00	II	-0.37933	-0.3121	-0.899611	-0.64311		07:40:00	0.241899	0.115799	1.1859	0.302599		07:40:00	0.360001	0.1369	-0.148003	0.649799
	07:50:00	II	-0.33486	-0.0681396	-0.62399	-0.51461		07:50:00	0.423101	-0.208401	1.0166	0.8979		07:50:00	0.237999	0.0365009	-0.517998	0.535
	08:00:00	II	-0.45176	0.0447998	-0.95222	-0.43873		08:00:00	0.3253	-0.131001	0.951099	0.525499		08:00:00	-0.108002	-0.2031	-0.863998	0.497099
	08:10:00	II	-0.380421	-0.12864	-0.52453	-0.5374		08:10:00	0.4592	0.0550995	0.937799	0.483101		08:10:00	-0.0299988	0.0128002	-1.017	0.615
	08:20:00	II	-0.477051	-0.0815697	-0.88093	-0.28083		08:20:00	0.315001	-0.0632	0.804701	0.5469		08:20:00	-0.292999	0.0217018	-1.119	0.714001
	08:30:00	II	-0.37364	-0.13378	-0.9195	-0.31345		08:30:00	0.359501	0.144299	0.952301	0.3806		08:30:00	-0.287003	0.0683994	-0.900002	0.8547
	08:40:00	II	-0.45836	0.09938	-1.11174	-0.0752201		08:40:00	0.646	0.0142002	1.0777	0.129		08:40:00	-0.198006	0.2486	-0.662003	0.920301
	08:50:00	II	-0.431419	-0.11342	-1.09355	-0.10154		08:50:00	0.5874	-0.0697002	1.1992	0.370899		08:50:00	-0.215996	0.2236	-0.931	0.847601
	09:00:00	II	-0.43268	0.0763798	-1.06734	0.30936		09:00:00	0.5961	-0.127501	1.1877	0.0609989		09:00:00	-0.184006	0.202	-0.573006	0.8563
	09:10:00	II	-0.30487	-0.14799	-1.17412	0.14991		09:10:00	0.495701	-0.1973	1.0023	0.150202		09:10:00	-0.345993	0.204201	-0.539993	0.8454
	09:20:00	II	-0.37062	-0.000969887	-0.90508	-0.11138		09:20:00	0.2887	-0.199699	1.0205	-0.23		09:20:00	-0.487	0.4065	-0.653	1.1296
	09:30:00	II	-0.43793	-0.22454	-1.0237	-0.18973		09:30:00	0.539301	-0.1143	0.962601	0.4135		09:30:00	-0.551994	0.656101	-0.649994	0.884201
	09:40:00	II	-0.47862	-0.25673	-1.16155	-0.0703697		09:40:00	0.483299	-0.203999	0.6003	0.509701		09:40:00	-0.601997	0.656898	-0.142998	1.1931
	09:50:00	II	-0.42616	-0.33374	-0.75016	0.09373		09:50:00	0.5452	0.1985	1.144	0.329599		09:50:00	-0.762001	0.8412	-0.277	0.7335
	10:00:00	II	-0.416161	-0.14643	-1.25956	-0.26188		10:00:00	0.423401	-0.0669003	1.0203	0.0713005		10:00:00	-0.564003	0.643099	-0.689003	0.9473
	10:10:00	II	-0.46896	-0.40007	-1.26656	-0.25972		10:10:00	0.660999	-0.2528	0.6005	0.239599		10:10:00	-0.657997	0.8957	-0.483002	1.0417
	10:20:00	II	-0.54351	-0.30645	-1.22501	-0.63334		10:20:00	0.531099	-0.450401	0.8342	-0.232101		10:20:00	-0.700005	0.7857	-0.511002	0.901699
	10:30:00	II	-0.4024	-0.40037	-1.2539	-1.0473		10:30:00	0.140501	-0.4396	0.8946	-0.2549		10:30:00	-0.501999	1.0118	-0.586998	0.9291
	10:40:00	II	-0.499331	-0.37333	-1.03383	-0.46715		10:40:00	0.312901	-0.3929	0.6744	-0.3456		10:40:00	-0.399002	1.1559	-0.643997	1.2299
	10:50:00	II	-0.39994	-0.30017	-1.21254	-0.73981		10:50:00	0.2206	-0.318699	0.7994	-0.0265007		10:50:00	-0.590004	1.08	-0.889	1.2571
	11:00:00	II	-0.2745	-0.31017	-0.9502	-0.52089		11:00:00	0.1744	-0.147699	0.469299	0.0713005		11:00:00	-0.651001	1.1544	-0.861	1.257
	11:10:00	II	-0.522631	-0.3444	-1.31403	-0.76373		11:10:00	0.1896	-0.3554	0.1499	-0.3731		11:10:00	-0.465004	0.966999	-0.521004	1.3317
	11:20:00	II	-0.68027	-0.49316	-1.19167	-1.14336		11:20:00	0.2349	-0.227798	0.536098	-0.116699		11:20:00	-0.467995	1.249	-0.457001	1.4934
	11:30:00	II	-0.50721	-0.16697	-0.910009	-1.33319		11:30:00	0.1325	-0.316801	0.52	-0.114901		11:30:00	-0.721001	1.1812	-0.167999	1.237
	11:40:00	II	-0.67189	-0.42849	-1.39639	-1.2744		11:40:00	0.1007	-0.1201	0.411301	-0.295		11:40:00	-0.547997	1.2007	-0.377998	1.6046
	11:50:00	II	-0.49957	-0.15452	-1.08447	-1.25647		11:50:00	0.194401	-0.349899	0.604101	-0.178999		11:50:00	-0.563004	1.2004	-0.326004	1.492
	12:00:00	II	-0.66195	-0.5076	-1.42345	-1.47182		12:00:00	0.3992	-0.4816	0.6129	-0.4499		12:00:00	-0.547005	1.1486	-0.0530014	1.0524
	12:10:00	II	-0.4336	-0.36073	-1.418	-1.18684		12:10:00	0.516699	-0.2397	0.8633	-0.113201		12:10:00	-0.464005	1.026	-0.379005	1.4763
	12:20:00	II	-0.547871	-0.48288	-1.12847	-1.33049		12:20:00	0.4457	-0.336901	0.968901	-0.2649		12:20:00	-0.349007	0.996801	-0.495003	1.6562
	12:30:00	II	-0.70821	-0.3137	-1.13121	-1.17111		12:30:00	0.578701	-0.1845	0.6642	-0.277599		12:30:00	-0.432999	1.351	-0.406998	1.4477
	12:40:00	II	-0.67904	-0.22451	-0.92394	-1.00539		12:40:00	0.449701	-0.250599	0.714401	0.1467		12:40:00	-0.436005	1.1982	-0.0490036	0.9529
	12:50:00	II	-0.56166	-0.60261	-0.95066	-1.31681		12:50:00	0.239698	-0.3587	0.941198	0.297201		12:50:00	-0.318001	1.0397	0.264	1.1595
	13:00:00	II	-0.37845	-0.66222	-1.07775	-1.31945		13:00:00	0.410099	-0.0599995	0.9949	0.2952		13:00:00	-0.244003	1.0494	0.117996	1.3656
	13:10:00	II	-0.52991	-0.91532	-1.14251	-1.25346		13:10:00	0.489599	-0.209999	1.09	0.504601		13:10:00	-0.0919952	1.0836	0.314003	1.3941
	13:20:00	II	-0.644211	-0.78412	-1.22981	-1.13476		13:20:00	0.779902	0.0156002	0.981201	0.120201		13:20:00	-0.115997	1.0206	0.336998	1.1509
	13:30:00	II	-0.48654	-0.89393	-1.14354	-1.2667		13:30:00	0.324099	-0.0135002	0.930698	0.311001		13:30:00	-0.0660019	1.1669	0.281998	1.5074
	13:40:00	II	-0.70949	-0.84723	-1.01749	-1.26921		13:40:00	0.5396	0.0202007	0.953199	0.232401		13:40:00	0.110001	0.940699	0.204002	1.7663
	13:50:00	II	-0.58781	-0.66781	-0.95711	-1.20346		13:50:00	0.5697	-0.0725002	0.762199	0.818399		13:50:00	0.0239944	1.0379	0.237	1.792
	14:00:00	II	-0.509701	-0.82347	-0.879101	-1.1709		14:00:00	0.2841	-0.0443993	0.621601	0.745401		14:00:00	-0.00900269	0.8972	0.380997	1.5773
	14:10:00	II	-0.617009	-1.12044	-0.735809	-1.99893		14:10:00	0.537401	-0.127701	0.8564	0.483398		14:10:00	-0.0950012	1.0395	0.356003	1.7199
	14:20:00	II	-0.4227	-0.80922	-0.6842	-1.49147		14:20:00	0.569401	0.105299	1.0543	0.5343		14:20:00	-0.189003	1.0476	0.250999	1.5786
	14:30:00	II	-0.682	-0.97629	-0.9881	-1.56135		14:30:00	0.408602	0.237499	0.506802	0.728399		14:30:00	0.0960007	0.8598	0.549004	1.49
	14:40:00	II	-0.54044	-1.05513	-0.93094	-1.46461		14:40:00	0.531401	-0.0352993	0.819099	0.684999		14:40:00	-0.223999	0.9074	0.494003	1.4779
	14:50:00	II	-0.460489	-0.94837	-1.02759	-1.5452		14:50:00	0.420198	0.0796013	0.426899	1.0453		14:50:00	-0.208	0.9979	0.467003	1.4475
	15:00:00	II	-0.6454	-0.92274	-1.083	-1.399		15:00:00	0.415699	0.0538998	0.602299	0.955099		15:00:00	0.0330048	0.826698	0.397003	1.1679
	15:10:00	II	-0.850599	-1.00605	-1.0908	-1.90651		15:10:00	0.372099	0.0987988	0.5867	0.691099		15:10:00	0.026001	0.5096	0.140999	1.0956
	15:20:00	II	-0.54188	-1.14506	-0.91138	-1.57697		15:20:00	0.1654	0.2435	1.0329	0.837		15:20:00	-0.131996	0.782499	0.167	0.880999
	15:30:00	II	-0.77281	-1.33771	-1.30381	-1.50184		15:30:00	0.400599	0.314001	0.806499	0.666401		15:30:00	0.00100708	0.7621	0.409004	0.995499
	15:40:00	II	-0.709431	-1.13364	-1.24463	-1.55007		15:40:00	0.584801	0.1674	0.3986	0.569502		15:40:00	-0.289993	0.758299	0.309006	1.043
	15:50:00	II	-0.46805	-1.18009	-0.900949	-1.56165		15:50:00	0.3892	0.5098	0.610901	0.3668		15:50:00	-0.272003	0.762699	0.125999	1.1474
	16:00:00	II	-0.532141	-1.10075	-0.90064	-1.45531		16:00:00	0.518101	0.2418	0.4821	0.586201		16:00:00	-0.157997	0.6989	-0.0800018	1.5649
	16:10:00	II	-0.416711	-0.90588	-0.78861	-1.30787		16:10:00	0.618502	0.426001	0.796902	0.4886		16:10:00	-0.385002	0.745001	-0.138	1.6435
	16:20:00	II	-0.5745	-0.94936	-0.624001	-1.24984		16:20:00	0.676001	0.146999	0.7999	0.4125		16:20:00	-0.487999	0.738899	-0.0979996	1.6298
	16:30:00	II	-0.85213	-1.1611	-1.05763	-1.47982		16:30:00	0.632502	0.0657005	0.9769	0.680201		16:30:00	-0.263	0.7859	-0.0680008	1.7005
	16:40:00	II	-0.63019	-0.84983	-0.80709	-1.3728		16:40:00	0.630901	0.144701	0.8734	0.4139		16:40:00	0.0139999	0.774502	-0.110001	1.666
	16:50:00	II	-0.61368	-1.07993	-0.86658	-1.58027		16:50:00	0.7306	0.198799	1.0119	0.677999		16:50:00	-0.0180054	0.646999	-0.262001	1.7032
	17:00:00	II	-0.52631	-1.07618	-0.55471	-1.43387		17:00:00	0.7995	0.201899	0.898901	-0.00380135		17:00:00	-0.0620041	0.6436	-0.25	1.5011
	17:10:00	II	-0.538441	-1.17118	-0.938041	-1.52498		17:10:00	0.815899	-0.125299	1.2171	0.511		17:10:00	-0.104996	0.644299	0.0439987	1.4123
	17:20:00	II	-0.44727	-1.08279	-0.59897	-1.40269		17:20:00	0.734499	0.155499	1.0997	0.5858		17:20:00	0.00299835	0.672501	0.111	1.5077
	17:30:00	II	-0.48205	-1.1251	-0.907849	-1.46787		17:30:00	0.323999	-0.0781002	1.4939	0.4597		17:30:00	-0.0770035	0.5028	-0.108002	1.2086
	17:40:00	II	-0.745239	-1.30066	-0.93784	-1.57359		17:40:00	0.7409	-0.1171	1.3709	0.8181		17:40:00	-0.561996	0.6022	-0.467003	1.4504
	17:50:00	II	-0.63922	-0.81743	-0.86912	-1.40986		17:50:00	0.977402	0.0291996	1.3115	0.9844		17:50:00	-0.43	0.665001	-0.842003	1.3874
	18:00:00	II	-0.4627	-0.83406	-0.8401	-1.21415		18:00:00	0.5453	0.181499	0.5179	0.6208		18:00:00	-0.464996	0.7969	-0.702995	1.4934
	18:10:00	II	-0.57476	-1.01359	-1.15476	-1.22514		18:10:00	0.5016	0.2784	1.0043	0.460199		18:10:00	-0.594002	0.767101	-0.675995	1.3521
	18:20:00	II	-0.67835	-1.03993	-1.24695	-1.08487		18:20:00	0.2673	0.365099	0.6612	0.577299		18:20:00	-0.325996	0.770699	-0.709	1.4678
	18:30:00	II	-0.726999	-1.21003	-1.4338	-1.24543		18:30:00	0.454199	0.550499	0.965399	1.0589		18:30:00	-0.395004	0.7992	-0.312004	1.4021
	18:40:00	II	-0.6269	-1.31756	-1.3866	-1.16569		18:40:00	0.6602	0.2507	1.4663	0.502201		18:40:00	-0.498001	0.716301	-0.312996	1.2879
	18:50:00	II	-0.6207	-1.22323	-1.3005	-1.26		18:50:00	0.2199	0.210001	1.1644	0.395201		18:50:00	-0.476997	0.768301	-0.112	1.2308
	19:00:00	II	-0.628799	-1.07799	-1.5012	-1.50979		19:00:00	0.358299	0.3123	0.929199	0.566599		19:00:00	-0.557999	0.744202	-0.299995	1.1932
	19:10:00	II	-0.5985	-1.19419	-1.3307	-1.35893		19:10:00	0.432701	0.3941	0.7847	0.616499		19:10:00	-0.438004	0.653502	-0.384003	1.3375
	19:20:00	II	-0.62891	-1.24903	-1.17751	-1.50304		19:20:00	0.1938	0.1952	0.809599	0.5191		19:20:00	-0.654999	0.504801	-0.358002	0.754499
	19:30:00	II	-0.4666	-1.15797	-1.1113	-1.58712		19:30:00	0.0601997	0.2407	0.177801	-0.0634995		19:30:00	-0.706001	0.786701	-0.57	1.1366
	19:40:00	II	-0.690701	-1.25315	-1.5251	-1.67304		19:40:00	0.4277	0.3894	1.08	0.2404		19:40:00	-0.538002	0.666201	-0.488998	0.9468
	19:50:00	II	-0.6761	-1.24175	-1.5463	-1.8105		19:50:00	0.277802	0.335001	0.9762	0.314402		19:50:00	-0.374001	0.484501	-0.155006	0.987501
	20:00:00	II	-0.7656	-1.06595	-1.4295	-1.88907		20:00:00	0.4956	0.0849991	1.174	0.386901		20:00:00	-0.381996	0.539099	-0.105995	0.943199
	20:10:00	II	-0.7826	-1.37572	-1.2649	-2.09781		20:10:00	0.7635	0.0852985	1.038	0.4583		20:10:00	-0.341995	0.813801	-0.174995	1.1006
	20:20:00	II	-0.843499	-1.29447	-1.3068	-1.88697		20:20:00	0.5131	0.2306	0.964001	0.449		20:20:00	-0.334999	0.6642	-0.231995	1.1491
	20:30:00	II	-0.599501	-1.41925	-1.0105	-1.97882		20:30:00	0.2691	-0.0564003	0.584001	0.282799		20:30:00	-0.325996	0.510099	-0.445999	1.0966
	20:40:00	II	-0.795361	-1.18356	-1.20246	-1.97813		20:40:00	0.2619	0.450701	0.834001	0.5052		20:40:00	-0.411003	0.536301	-0.163002	1.011
	20:50:00	II	-0.636901	-1.17958	-0.8163	-2.05579		20:50:00	0.2302	0.0455017	0.617999	0.3204		20:50:00	-0.773003	0.5261	-0.501999	1.2373
	21:00:00	II	-0.778831	-1.17161	-1.00763	-1.85964		21:00:00	0.3207	-0.2075	1.03	0.6585		21:00:00	-0.619003	0.7257	-0.424004	1.181
	21:10:00	II	-0.5301	-1.13421	-0.5263	-1.88982		21:10:00	0.6243	0.262501	1.27	1.0104		21:10:00	-0.789001	0.836401	-0.528	1.1053
	21:20:00	II	-0.5387	-1.1907	-0.549001	-1.77733		21:20:00	0.156801	0.2106	0.684001	0.747599		21:20:00	-0.640007	0.549	-0.439003	1.1104
	21:30:00	II	-0.834	-0.88897	-0.7761	-1.42542		21:30:00	0.7146	0.148399	1.144	0.6359		21:30:00	-0.643997	0.5315	-0.451996	1.2616
	21:40:00	II	-0.5386	-0.9638	-0.800301	-1.88188		21:40:00	0.476801	-0.0951004	0.994001	0.0145994		21:40:00	-0.682999	0.4519	-0.446999	1.2834
	21:50:00	II	-0.6846	-0.87285	-0.8362	-1.5156		21:50:00	0.863401	-0.0245991	1.324	0.327899		21:50:00	-0.575996	0.551201	-0.387001	1.28
	22:00:00	II	-0.7391	-1.17039	-0.9251	-1.76119		22:00:00	0.9634	0.0790997	1.782	-0.0507		22:00:00	-0.68	0.622799	-0.353996	1.5244
	22:10:00	II	-0.6087	-1.14724	-0.9633	-1.4163								22:10:00	-0.708	0.667301	-0.254005	1.5099
	22:20:00	II	-0.661501	-1.2868	-1.1748	-1.57911								22:20:00	-0.684998	0.550999	-0.301003	1.4168
	22:30:00	II	-0.724199	-0.99366	-1.2063	-1.7828								22:30:00	-0.576004	0.4713	-0.0100021	1.428
	22:40:00	II	-0.718801	-1.1169	-1.371	-1.721								22:40:00	-0.278999	0.546999	-0.206001	1.57
	22:50:00	II	-0.761	-1.35362	-1.3944	-1.83703								22:50:00	-0.159996	0.626501	-0.325996	1.6173
	23:00:00	II	-0.572101	-1.21041	-1.2423	-1.874								23:00:00	-0.282997	0.6257	-0.204994	1.5715
	23:10:00	II	-0.6877	-1.23762	-1.5084	-1.62682								23:10:00	-0.292	0.6565	-0.335999	1.7136
	23:20:00	II	-0.8377	-1.34791	-1.5544	-1.78835								23:20:00	-0.298996	0.601601	-0.528999	1.6688
	23:30:00	II	-0.4916	-1.04542	-1.5822	-1.33949								23:30:00	-0.418999	0.4879	-0.497993	1.4345
	23:40:00	II	-0.6553	-0.96907	-1.6925	-1.44492								23:40:00	-0.279999	0.688601	-0.528999	1.575
	23:50:00	II	-0.8017	-1.00709	-1.6047	-1.64326								23:50:00	-0.360001	0.530401	-0.568001	1.5393
	24:00	II	-0.6984	-1.0112	-1.2982	-1.41481								24:00	-0.352997	0.7358	-0.857002	1.3753
	24:10	II	-0.271099	-0.6791	-1.0007	-1.0319								24:10	-0.386002	0.7057	-0.679001	1.5491
	24:20	II	-0.4783	-0.796801	-0.8923	-1.2803								24:20	-0.595001	0.5263	-0.759003	1.5201
	24:30	II	-0.435699	-0.9272	-1.1142	-1.1909								24:30	-0.579994	0.605101	-0.460999	1.3281
	24:40	II	-0.336201	-0.940399	-1.2103	-1.0941								24:40	-0.586998	0.7766	-0.349998	1.3025
	24:50	II	-0.4333	-0.921299	-1.2731	-1.1899								24:50	-0.457001	0.684999	-0.250999	1.4237
	25:00	II	-0.292	-0.809401	-0.5452	-1.4527								25:00	-0.649002	0.766499	-0.119003	1.3069
	25:10	II	-0.3092	-1.0615	-0.7701	-1.6758
	25:20	II	-0.2143	-1.0133	-0.6315	-1.5725
	25:30	II	-0.4086	-0.934799	-0.616199	-1.4726
	25:40	II	-0.273199	-0.878799	-0.593899	-1.3403
	25:50	II	-0.332701	-0.741001	-0.7141	-1.3393
	26:00	II	-0.394999	-0.9648	-0.763599	-1.6076
	26:10	II	-0.4198	-0.9326	-0.833199	-1.311
	26:20	II	-0.2068	-0.9585	-0.921299	-1.1654
	26:30	II	-0.358299	-1.0256	-0.7297	-1.3958
	26:40	II	-0.385201	-1.0465	-1.0379	-1.2759
	26:50	II	-0.0886002	-0.960899	-0.739599	-1.0395
	27:00	II	-0.429001	-0.844101	-1.1036	-1.1746
	27:10	II	-0.3892	-0.837	-1.0396	-1.2479
	27:20	II	-0.5172	-0.8932	-1.1434	-1.4656
	27:30	II	-0.2803	-0.8971	-0.924799	-1.4464
	27:40	II	-0.3557	-0.698	-0.961399	-1.3417
	27:50	II	-0.4774	-0.715101	-1.251	-1.2791
	28:00	II	-0.3734	-0.901999	-0.9417	-1.3655
	28:10	II	-0.3927	-0.934	-1.1016	-1.1681
	28:20	II	-0.4338	-0.934401	-1.2481	-1.224
	28:30	II	-0.3277	-1.0699	-1.2135	-1.2464
	28:40	II	-0.5508	-0.805401	-1.2525	-1.0941
	28:50	II	-0.434	-0.924101	-1.2734	-1.3447
	29:00	II	-0.713902	-0.665001	-1.0813	-1.4733
	29:10	II	-0.5569	-0.73	-0.9298	-1.5853
	29:20	II	-0.438999	-0.683701	-0.951399	-1.3317
	29:30	II	-0.4828	-0.618401	-1.1068	-1.3084
	29:40	II	-0.2316	-0.5832	-0.7292	-1.2132
	29:50	II	-0.0946999	-0.5588	-0.870199	-0.971199
	30:00	II	-0.0554008	-0.399	-0.691002	-0.957001
	30:10	II	-0.000200272	-0.529799	-0.8153	-1.0099
	30:20	II	-0.0258999	-0.7589	-1.1173	-0.871401
	30:30	II	-0.1115	-0.654699	-0.8808	-0.930099
	30:40	II	-0.2062	-0.512199	-0.901501	-1.0875
	30:50	II	-0.477299	-0.506599	-1.2014	-1.1596
	31:00	II	-0.384699	-0.5634	-1.0581	-1.102
	31:10	II	-0.379999	-0.705299	-0.9995	-1.142
	31:20	II	-0.214699	-0.772001	-0.8529	-1.2477
	31:30	II	-0.1686	-0.645399	-0.9139	-0.922699
	31:40	II	-0.222401	-0.689899	-0.836201	-1.2356
	31:50	II	-0.391199	-0.509699	-0.9107	-0.975599
	32:00	II	-0.123699	-0.718601	-0.9102	-1.0315
	32:10	II	-0.1733	-0.544802	-0.786798	-1.2113
	32:20	II	-0.1043	-0.625601	-0.8962	-1.0226
	32:30	II	-0.1549	-0.512199	-0.975601	-0.9359
	32:40	II	-0.103701	-0.5697	-0.8342	-0.817301
	32:50	II	-0.0895004	-0.73	-0.826302	-0.43
	33:00	II	-0.2495	-0.620899	-0.865501	-0.5387
	33:10	II	0.1157	-0.631701	-0.725201	-0.679901
	33:20	II	-0.167999	-0.6674	-0.874899	-0.7981
	33:30	II	-0.125799	-0.7728	-1.0591	-0.750999
	33:40	II	0.0995998	-0.711699	-0.822399	-0.838999
	33:50	II	-0.1022	-0.6241	-0.889099	-0.845499
	34:00	II	-0.0779991	-0.665499	-0.933399	-1.0013
	34:10	II	-0.1227	-0.813	-1.0886	-0.678101
	34:20	II	-0.342199	-0.632898	-1.1089	-0.6847
	34:30	II	-0.255798	-0.693199	-1.1758	-0.879999
	34:40	II	-0.260799	-0.7379	-0.969601	-1.2214
	34:50	II	-0.2276	-0.864201	-0.7915	-1.1318
	35:00	II	0.0143013	-0.9123	-0.920599	-0.9025
	35:10	II	-0.115	-0.706202	-0.939301	-0.933401
	35:20	II	-0.228601	-0.589201	-0.850801	-1.1139
	35:30	II	-0.171999	-0.7533	-0.941799	-0.9268
	35:40	II	-0.0149002	-0.7869	-0.687698	-0.825399
	35:50	II	-0.392502	-0.776701	-1.1219	-0.916401
	36:00	II	-0.2265	-0.768	-1.0539	-0.920601
	36:10	II	-0.186899	-0.848301	-0.82	-0.913101
	36:20	II	-0.2787	-0.844101	-1.0377	-0.7978
	36:30	II	-0.1873	-0.853201	-1.0521	-0.897301
	36:40	II	-0.118301	-0.6668	-0.8181	-0.7915
	36:50	II	-0.2006	-0.9051	-0.8589	-0.7048
	37:00	II	-0.0620995	-0.755501	-0.7423	-0.894901
	37:10	II	-0.105999	-0.5333	-0.8062	-0.6182
	37:20	II	-0.2491	-0.566898	-0.7605	-0.575499
	37:30	II	-0.128601	-0.603901	-0.725	-0.6978
	37:40	II	-0.0707989	-0.732201	-0.757198	-0.8029
	37:50	II	-0.0452003	-0.674799	-0.6071	-0.822699
	38:00	II	-0.1847	-0.4263	-0.6735	-0.7691
	38:10	II	-0.1154	-0.5474	-0.530401	-0.9181
	38:20	II	-0.117701	-0.605999	-0.5835	-0.8025
	38:30	II	-0.304998	-0.753199	-0.786699	-0.6628
	38:40	II	-0.2675	-0.5555	-0.653599	-0.753801
	38:50	II	-0.2164	-0.8032	-0.775301	-0.7675
	39:00	II	-0.1586	-0.6847	-0.659599	-0.6689
	39:10	II	0.00769997	-0.8202	-0.6241	-0.639599
	39:20	II	-0.238201	-0.9063	-0.806601	-0.453001
	39:30	II	-0.136999	-0.703899	-0.881399	-0.5835
	39:40	II	0.0235996	-0.740999	-0.791	-0.442499
	39:50	II	-0.114	-0.5497	-0.7348	-0.467901
	40:00	II	0.0795002	-0.637199	-0.6401	-0.401001
	40:10	II	-0.0278988	-0.623299	-0.7813	-0.1362
	40:20	II	-0.0221996	-0.7216	-1.1554	-0.2264
	40:30	II	-0.0240002	-0.728001	-1.1938	-0.4571
	40:40	II	-0.2234	-0.862701	-0.878801	-0.319201
	40:50	II	-0.273602	-0.6182	-0.9496	-0.179899
