# Supplementary material for: Live imaging of hair bundle polarity acquisition demonstrates a critical timeline for transcription factor Emx2
Source: eLife. 2020 Sep 23;9:e59282. doi: 10.7554/eLife.59282 (PMC7535933; doi:10.7554/eLife.59282)
Supplement: Figure 3—source data 2. [file elife-59282-fig3-data2.xlsx]

## Sheet: Sheet1
	Figure 3--source data 2
	Quantification of daughter centriole trajectories in Atoh1Cre; RosaEmx2/tdT; CAG:GFP-Centrin2 and Gfi1Cre; RosaEmx2/tdT; CAG:GFP-Centrin2 utricles.
	Genotype	Sample	Total HCs	HCs without changing polarity (already shifted medial)	HCs altered polarity	DC moving from center to medial	DC moving from lateral to medial
	Atoh1Cre; RosaEmx2	#1	36	30	6	4	2
		#2	20	17	3	2	1
		#3	26	20	6	3	3
		Average	27.3333	22.3333	5	3	2
		Sum	82	67	15	9	6
	Gfi1Cre; RosaEmx2	#1	38	22	16	15	1			Atoh1Cre; RosaEmx2	Gfi1Cre; RosaEmx2
		#2	29	17	12	9	3		Center to medial	9	6
		#3	33	22	11	9	2		Lateral to medial	6	33
		Average	33.3333	20.3333	13	11	2				p=0.001043
		Sum	100	61	39	33	6
