# Supplementary material for: Live imaging of hair bundle polarity acquisition demonstrates a critical timeline for transcription factor Emx2
Source: eLife. 2020 Sep 23;9:e59282. doi: 10.7554/eLife.59282 (PMC7535933; doi:10.7554/eLife.59282)
Supplement: Figure 4—source data 1. [file elife-59282-fig4-data1.xlsx]

## Sheet: Sheet1
	Figure 4--source data 1
	Efficiency of infections and hair bundle reversal phenotype mediated by control (AAV-tdT) and AAV-Emx2-tdT viruses.
		sample	total HCs	tdT+ HCs	tdT+/total HCs (%)	tdT+ MHCs	bundle reversal in tdT+ MHCs	bundle reversal in tdT+ MHCs/tdT+ MHCs (%)
	AAV2.7m8-tdT	#1	275	188	68.3636	166	0	0
		#2	326	258	79.1411	202	0	0
		#3	224	159	70.9821	148	0	0
		Average	275	201.667	72.829	172	0	0
	AAV2.7m8-Emx2-P2A-tdT	#1	205	161	78.5366	133	19	14.2857
		#2	281	189	67.2598	156	10	6.41026
		#3	271	184	67.8967	139	29	20.8633
		Average	252.333	178	71.231	142.667	19.3333	13.8531
