# Supplementary material for: Live imaging of hair bundle polarity acquisition demonstrates a critical timeline for transcription factor Emx2
Source: eLife. 2020 Sep 23;9:e59282. doi: 10.7554/eLife.59282 (PMC7535933; doi:10.7554/eLife.59282)
Supplement: Figure 4—source data 2. [file elife-59282-fig4-data2.xlsx]

## Sheet: Sheet1
	Figure 4--source data 2
	Correlation of Emx2 expression levels with hair bundle orientation.
	Emx2 expression level in AAV-Emx2-tdT infected HCs with normal bundle orientation				Emx2 expression level in AAV-Emx2-tdT infected HCs with reversed bundle orientation
	HC#	Emx2 expression (A.U.)			HC#	Emx2 expression (A.U.)
	1	52.3			1	47
	2	30.8			2	33.7
	3	28.4			3	38.5
	4	40.4			4	32.1
	5	40.3			5	31.4
	6	36.3			6	29
	7	39			7	49.4
	8	48.5			8	41.1
	9	41.4			9	49.7
	10	59.2			10	50
	11	52.4			11	57
	12	48.6			12	29
	13	63.9			13	65.8
	14	46.8			14	57.7
	15	38.4			15	47.8
	16	36.3			16	60.9
	17	42.9			17	28.6
	18	47.6			18	45.1
	19	56.2			19	66.6
	20	68.3			20	71.6
	21	69.6			21	54.6
	22	73.1			22	29.2
	23	60.4			23	52.3
	24	58.5			24	60.5
	25	87.8			Average	47.0261
	26	79.4			P-value	0.197
	27	87.7
	28	41.2
	29	60.9
	30	47.5
	31	36.6
	Average	52.28
