# Supplementary material for: Live imaging of hair bundle polarity acquisition demonstrates a critical timeline for transcription factor Emx2
Source: eLife. 2020 Sep 23;9:e59282. doi: 10.7554/eLife.59282 (PMC7535933; doi:10.7554/eLife.59282)
Supplement: Figure 5—source data 1. [file elife-59282-fig5-data1.xlsx]

## Sheet: Sheet1
	Figure 5--source data 1
	Coordinates of centriole positions relative to the center of the cell or the MCs in Md HC8 and Md HC9.
	Md HC8										Md HC9
	Time (hr:min)	DC-X relative to the MC-X (μm)	DC-Y relative to the MC-Y (μm)	MC-X relative to the center of the cell (μm)	MC-Y relative to the center of the cell (μm)	DC-X relative to the center of the cell (μm)	DC-Y relative to the center of the cell (μm)	td-signal above background (A.U.)			Time (hr:min)	DC-X relative to the MC-X (μm)	DC-Y relative to the MC-Y (μm)	MC-X relative to the center of the cell (μm)	MC-Y relative to the center of the cell (μm)	DC-X relative to the center of the cell (μm)	DC-Y relative to the center of the cell (μm)	td-signal above background (A.U.)
	00:00:00	-0.531101	0.264999	-	-	-	-	4.396			00:00:00	-0.0702019	0.422997	-	-	-	-	1.812
	00:10:00	-0.701099	0.520004	-	-	-	-	2.7595			00:10:00	0.159801	0.445198	-	-	-	-	2.505
	00:20:00	-0.6161	0.264999	-	-	-	-	3.09133			00:20:00	-0.598999	0.545296	-	-	-	-	2.08467
	00:30:00	-0.412102	0.434998	-	-	-	-	2.64575			00:30:00	-0.0702019	0.384804	-	-	-	-	1.91175
	00:40:00	-0.650101	0.333	-	-	-	-	2.8208			00:40:00	-0.169998	0.243401	-	-	-	-	2.0132
	00:50:00	-0.5821	0.213997	-	-	-	-	2.81917			00:50:00	-0.168999	0.156303	-	-	-	-	2.08133
	01:00:00	-0.752098	-0.262001	-	-	-	-	3.10643			01:00:00	0.0677032	0.383003	-	-	-	-	2.04467
	01:10:00	-0.633099	-0.601997	-	-	-	-	2.85629			01:10:00	0.133198	0.388802	-	-	-	-	2.12433
	01:20:00	-0.633102	-0.534004	-	-	-	-	3.46157			01:20:00	0.392601	0.317604	-	-	-	-	2.3415
	01:30:00	-0.480099	-0.397995	-	-	-	-	3.176			01:30:00	0.139801	0.284798	-	-	-	-	2.287
	01:40:00	-0.433399	-0.239998	-	-	-	-	3.577			01:40:00	-0.129101	0.323799	-	-	-	-	2.11133
	01:50:00	-0.4627	-0.460999	-	-	-	-	3.86357			01:50:00	0.4198	0.4067	-	-	-	-	1.89917
	02:00:00	-0.434902	-0.374001	-	-	-	-	3.49771			02:00:00	0.0694008	0.425804	-	-	-	-	1.713
	02:10:00	-0.524799	-0.390999	-	-	-	-	2.70157			02:10:00	0.271999	0.306999	-	-	-	-	0.8875
	02:20:00	-0.1203	-0.167	-	-	-	-	2.94			02:20:00	-0.225201	-0.0339966	-	-	-	-	1.03833
	02:30:00	-0.743999	0.150002	-	-	-	-	2.393			02:30:00	0.189701	-0.513397	-	-	-	-	1.03067
	02:40:00	-0.572399	0.341995	-	-	-	-	1.63386			02:40:00	-0.440903	-0.188606	-	-	-	-	0.929833
	02:50:00	-0.764297	0.284996	-	-	-	-	0.676286			02:50:00	-0.721897	0.167297	-	-	-	-	0.905333
	03:00:00	-0.463902	0.00700378	-	-	-	-	-0.385714			03:00:00	-0.660702	0.242104	-	-	-	-	0.955333
	03:10:00	-0.488197	0.373001	-	-	-	-	-0.538			03:10:00	-0.565399	0.144402	-	-	-	-	1.605
	03:20:00	-0.4576	0.090004	-	-	-	-	-0.425429			03:20:00	-0.656502	0.430603	-	-	-	-	1.31817
	03:30:00	-0.496399	0.156006	-	-	-	-	-0.861429			03:30:00	-0.2831	0.408699	-	-	-	-	1.40717
	03:40:00	0.0821991	-0.445	-	-	-	-	-1.111			03:40:00	-0.352898	0.474602	-	-	-	-	1.46267
	03:50:00	0.136398	-0.389999	-	-	-	-	-0.282286			03:50:00	-0.507198	0.737198	-	-	-	-	1.38967
	04:00:00	-0.2938	-0.404999	-	-	-	-	-0.180286			04:00:00	-0.0509987	0.389	-	-	-	-	1.6575
	04:10:00	-0.352997	-0.659004	-	-	-	-	-0.675857			04:10:00	-0.138397	0.3629	-	-	-	-	1.22183
	04:20:00	-0.0990982	-0.327995	-	-	-	-	-0.314714			04:20:00	0.100101	0.272499	-	-	-	-	1.22183
	04:30:00	0.170002	-0.267998	-	-	-	-	-1.01643			04:30:00	0.34	0.0381012	-	-	-	-	0.971333
	04:40:00	0.170002	-0.0730057	-	-	-	-	-1.26171			04:40:00	0.34	-0.1492	-	-	-	-	0.817
	04:50:00	-0.2813	-0.227005	-	-	-	-	-1.18714			04:50:00	0	-0.0948944	-	-	-	-	0.835667
	05:00:00	-0.507301	-0.515999	-	-	-	-	-1.716			05:00:00	-0.2365	-0.212196	-	-	-	-	0.5315
	05:10:00	-0.0805969	-0.478004	-	-	-	-	-2.49414			05:10:00	-0.1684	0.148201	-	-	-	-	0.742833
	05:20:00	-0.243603	-0.557999	-	-	-	-	-1.94			05:20:00	0.0257988	0.253403	-	-	-	-	0.694833
	05:30:00	-0.295101	-0.528	-	-	-	-	-2.19857			05:30:00	0.0383987	0.184105	-	-	-	-	0.917167
	05:40:00	-0.262798	-0.364998	-	-	-	-	-1.79986			05:40:00	-0.250599	0.0596008	-	-	-	-	1.024
	05:50:00	0.1866	-0.534996	-	-	-	-	-2.02429			05:50:00	-0.310097	0.203796	-	-	-	-	0.940833
	06:00:00	0.113098	-0.342003	-	-	-	-	-2.25929			06:00:00	-0.159401	-0.108002	-	-	-	-	1.053
	06:10:00	0.161201	0.205002	-	-	-	-	-2.56357			06:10:00	0.128899	0.484398	-	-	-	-	0.939333
	06:20:00	0.170601	0.086998	-	-	-	-	-1.87014			06:20:00	0.184101	0.0329056	-	-	-	-	0.931333
	06:30:00	0.248402	0.121002	-	-	-	-	-2.03586			06:30:00	-0.319599	-0.126801	-	-	-	-	0.711667
	06:40:00	-0.709103	-0.392006	-	-	-	-	-2.05514			06:40:00	0.0205002	-0.429596	-	-	-	-	0.755167
	06:50:00	-0.509899	0.00600433	-	-	-	-	-1.81671			06:50:00	0.0342979	0.0992966	-	-	-	-	0.656167
	07:00:00	-0.288998	-0.248001	-	-	-	-	-1.79914			07:00:00	-0.0143013	0.105995	-	-	-	-	1.02483
	07:10:00	-0.2286	-0.0210037	-	-	-	-	-2.194			07:10:00	-0.239799	-0.000297546	-	-	-	-	0.750333
	07:20:00	-0.0788002	0.169998	-	-	-	-	-2.20586			07:20:00	0.0121002	-0.553001	-	-	-	-	0.6195
	07:30:00	-0.1385	0.170006	-	-	-	-	-2.36357			07:30:00	-0.3195	-1.0831	-	-	-	-	0.689833
	07:40:00	-0.5177	0.347	-	-	-	-	-1.92157			07:40:00	-0.686001	-0.973206	-	-	-	-	0.732167
	07:50:00	-0.405602	0.425995	-	-	-	-	-2.272			07:50:00	-0.633698	-0.925003	-	-	-	-	1.08117
	08:00:00	-0.635799	0.426003	-	-	-	-	-2.17929			08:00:00	0.0367012	-0.763603	-	-	-	-	0.628
	08:10:00	-0.398899	0.220001	-	-	-	-	-1.643			08:10:00	0.136299	-0.8535	-	-	-	-	1.58167
	08:20:00	-0.659599	0.034996	-	-	-	-	-1.24557			08:20:00	-0.245201	-0.760201	-	-	-	-	2.20667
	08:30:00	0.0513992	-0.113998	-	-	-	-	-0.506			08:30:00	0.0848999	-0.665398	-	-	-	-	2.87167
	08:40:00	-0.661598	-0.147003	-	-	-	-	0.313			08:40:00	-0.329601	-0.751602	-	-	-	-	3.12483
	08:50:00	-0.496098	-0.0530014	-	-	-	-	0.404571			08:50:00	-0.557201	-0.199097	-	-	-	-	3.88333
	09:00:00	-0.782398	-0.182999	-	-	-	-	0.638857			09:00:00	-0.902699	-0.469093	-	-	-	-	4.56633
	09:10:00	-0.5681	-0.0629959	-	-	-	-	1.17029			09:10:00	-0.7728	-0.611	-	-	-	-	4.60333
	09:20:00	-0.2813	-0.237	-	-	-	-	1.35043			09:20:00	-0.992802	-0.381805	-	-	-	-	4.42917
	09:30:00	-0.287601	-0.340996	-	-	-	-	1.50786			09:30:00	-0.738102	-0.102699	-	-	-	-	4.06633
	09:40:00	0.0424004	0.0800018	-	-	-	-	1.57186			09:40:00	-0.7318	-0.0876999	-	-	-	-	4.27733
	09:50:00	0.0263977	0.654007	-	-	-	-	1.39057			09:50:00	-0.549297	-0.156799	-	-	-	-	4.38717
	10:00:00	0.193298	0.750999	-	-	-	-	1.46514			10:00:00	-0.533001	-0.155998	-	-	-	-	4.58917
	10:10:00	-0.516102	0.852005	-	-	-	-	0.917857			10:10:00	-0.585499	-0.184593	-	-	-	-	4.14733
	10:20:00	-0.1362	0.801994	-	-	-	-	0.283286			10:20:00	-0.6675	-0.328903	-	-	-	-	4.32517
	10:30:00	-0.408901	0.725998	-	-	-	-	0.464429			10:30:00	-0.615101	-0.627701	-	-	-	-	5.01617
	10:40:00	-0.208797	0.884003	-	-	-	-	0.564			10:40:00	0.2593	-0.646194	-	-	-	-	5.73833
	10:50:00	-0.361099	0.799004	-	-	-	-	0.488429			10:50:00	0.248699	-0.7286	-	-	-	-	5.6225
	11:00:00	-0.4244	0.804001	-	-	-	-	0.805			11:00:00	-0.4063	-0.571396	-	-	-	-	6.00633
	11:10:00	-0.309601	0.848	-	-	-	-	0.599429			11:10:00	0.0580978	-0.7145	-	-	-	-	6.95533
	11:20:00	-0.389999	0.744003	-	-	-	-	1.21214			11:20:00	0.379303	-0.7714	-	-	-	-	7.01217
	11:30:00	-0.5849	0.728996	-	-	-	-	0.978429			11:30:00	0.282299	-0.900299	-	-	-	-	6.69117
	11:40:00	-0.234497	0.862999	-	-	-	-	0.852857			11:40:00	0.5284	-0.764404	-	-	-	-	7.125
	11:50:00	-0.161301	0.961998	-	-	-	-	0.943857			11:50:00	0.344601	-0.893097	-	-	-	-	8.6005
	12:00:00	-0.116299	0.681	-	-	-	-	1.12971			12:00:00	0.1287	-0.5327	-	-	-	-	9.5135
	12:10:00	-0.0950012	0.803001	-	-	-	-	0.636857			12:10:00	0.0730019	-0.396004	-	-	-	-	10.6543
	12:20:00	-0.0228996	0.701996	-	-	-	-	0.627714			12:20:00	-0.036602	-0.356003	-	-	-	-	11.8177
	12:30:00	0.135498	0.671005	-	-	-	-	0.824			12:30:00	-0.277	-0.998596	-	-	-	-	13.3342
	12:40:00	-0.00329971	0.805	-	-	-	-	1.60471			12:40:00	-0.264698	-0.816406	-	-	-	-	14.7467
	12:50:00	0.1744	0.865005	-	-	-	-	1.57743			12:50:00	-0.313301	-0.805298	-	-	-	-	14.8998
	13:00:00	0.0361023	0.713005	-	-	-	-	1.61114			13:00:00	-0.4856	-0.432899	-	-	-	-	15.274
	13:10:00	-0.491798	0.932999	-	-	-	-	1.46243			13:10:00	-0.645897	-0.369507	-	-	-	-	16.0613
	13:20:00	-0.711899	0.354004	-	-	-	-	1.74814			13:20:00	-	-	-0.7686	0.278206	-1.3183	0.049202	17.1685
	13:30:00	-0.745899	0.413002	-	-	-	-	2.298			13:30:00	-	-	-0.650803	-0.276596	-1.2075	-0.6922	18.2612
	13:40:00	-0.7556	0.448006	-	-	-	-	1.99914			13:40:00	-	-	-1.5227	-0.379997	-1.8065	-0.602997	17.938
	13:50:00	-0.950901	0.720001	-	-	-	-	2.18157			13:50:00	-	-	-1.2956	-0.0195999	-1.4279	-0.409195	18.8203
	14:00:00	-0.215103	0.705994	-	-	-	-	2.09443			14:00:00	-	-	-1.0741	0.295807	-1.2391	0.140007	19.9362
	14:10:00	-0.363998	0.378998	-	-	-	-	2.35286			14:10:00	-	-	-1.4555	0.0818024	-1.7227	-0.2537	20.5882
	14:20:00	-0.229198	0.112	-	-	-	-	2.24586			14:20:00	-	-	-1.5063	0.152695	-1.7151	-0.3992	21.4815
	14:30:00	-0.7803	0.246002	-	-	-	-	2.77729			14:30:00	-	-	-1.1862	0.3657	-1.321	-0.212105	21.7437
	14:40:00	-1.0632	0.226997	-	-	-	-	2.33586			14:40:00	-	-	-0.9687	0.196205	-1.0587	-0.286697	23.1503
	14:50:00	-1.0127	0.380997	-	-	-	-	2.83471			14:50:00	-	-	-1.1032	0.280998	-1.2072	-0.218796	24.1513
	15:00:00	-1.2642	0.278	-	-	-	-	2.72714			15:00:00	-	-	-1.0867	-0.0329971	-1.1872	-0.368095	24.6215
	15:10:00	-1.1801	0.804001	-	-	-	-	2.94814			15:10:00	-	-	-1.2304	0.227203	-0.547203	-0.133102	24.9875
	15:20:00	-0.969498	0.0759964	-	-	-	-	3.16614			15:20:00	-	-	-0.922298	-0.0673981	-1.1934	-0.249901	25.5127
	15:30:00	-1.1845	0.169998	-	-	-	-	4.26214			15:30:00	-	-	-1.0624	0.0301971	-1.3211	-0.0958023	26.9195
	15:40:00	-1.2343	-0.0220032	-	-	-	-	3.73243			15:40:00	-	-	-0.935799	-0.135399	-0.786697	-0.326599	27.2767
	15:50:00	-0.978901	0.163002	-	-	-	-	4.131			15:50:00	-	-	-1.124	-0.0410004	-0.872402	-0.198303	27.3778
	16:00:00	-1.0897	0.515999	-	-	-	-	4.61714			16:00:00	-	-	-1.6552	0.0876999	-1.1243	-0.179001	27.455
	16:10:00	-1.2481	0.519005	-	-	-	-	4.58314			16:10:00	-	-	-1.2997	0.205704	-0.942898	0.0357056	28.1178
	16:20:00	-0.933601	0.384003	-	-	-	-	5.049			16:20:00	-	-	-1.3307	-0.1511	-1.0178	-0.148605	28.0178
	16:30:00	-0.995399	0.349998	-	-	-	-	5.185			16:30:00	-	-	-1.3348	-0.0587997	-1.3348	-0.133202	27.8637
	16:40:00	-0.922901	0.313995	-	-	-	-	4.32757			16:40:00	-	-	-1.254	-0.124695	-1.0305	-0.124298	27.7103
	16:50:00	-1.2335	0.503006	-	-	-	-	5.12543			16:50:00	-	-	-1.2264	-0.279602	-1.1687	0.118202	27.5187
	17:00:00	-0.847603	0.264	-	-	-	-	5.05			17:00:00	-	-	-1.287	-0.184807	-0.9893	-0.184807	28.1623
	17:10:00	-0.678101	0.00800323	-	-	-	-	4.934			17:10:00	-	-	-1.2625	-0.303604	-0.948799	-0.303604	27.6207
	17:20:00	-0.572399	-0.152	-	-	-	-	5.63871			17:20:00	-	-	-1.0888	-0.377602	-0.877903	-0.207596	27.9292
	17:30:00	-0.500301	-0.038002	-	-	-	-	5.98629			17:30:00	-	-	-1.0872	-0.057106	-0.845203	-0.057106	27.9928
	17:40:00	-0.7957	-0.185005	-	-	-	-	5.70829			17:40:00	-	-	-1.0424	-0.227303	-0.956501	-0.261002	27.8177
	17:50:00	-0.933098	0.103004	-	-	-	-	6.45186			17:50:00	-	-	-0.998798	-0.177101	-1.0377	-0.298302	28.4638
	18:00:00	-0.978401	0.257996	-	-	-	-	6.05914			18:00:00	-	-	-0.866898	-0.397102	-0.639698	-0.449501	28.123
	18:10:00	-0.951702	0.249001	-	-	-	-	6.62929			18:10:00	-	-	-0.863998	-0.252899	-0.5476	-0.195396	28.0913
	18:20:00	-0.684002	0.694	-	-	-	-	6.79371			18:20:00	-	-	-1.0589	-0.3815	-0.880501	-0.316902	28.5315
	18:30:00	-1.046	0.517998	-	-	-	-	6.11714			18:30:00	-	-	-1.1133	-0.3368	-0.900299	-0.0707016	28.333
	18:40:00	-1.0173	0.586998	-	-	-	-	5.721			18:40:00	-	-	-0.542999	-0.615898	-0.395199	-0.600296	28.2543
	18:50:00	-1.0973	0.539001	-	-	-	-	6.196			18:50:00	-	-	-0.371201	-0.949501	-0.132599	-0.467804	27.9452
	19:00:00	-1.0618	0.385002	-	-	-	-	5.51629			19:00:00	-	-	-0.158699	-1.1224	0.0255013	-0.435501	27.7403
	19:10:00	-0.861797	0.402	-	-	-	-	6.15029			19:10:00	-	-	-1.0073	-0.426697	-0.605	-0.00559998	27.8173
	19:20:00	-0.9468	0.432999	-	-	-	-	5.96586			19:20:00	-	-	-0.639797	-0.765594	-0.318398	-0.247299	27.6262
	19:30:00	-0.950699	0.445999	-	-	-	-	5.98757			19:30:00	-	-	-0.6497	-1.11449	-0.9515	-0.3647	27.2042
	19:40:00	-0.988701	0.482002	-	-	-	-	7.02529			19:40:00	-	-	-0.2934	-1.3431	-0.276199	-0.203796	28.3662
	19:50:00	-0.980999	0.457001	-	-	-	-	7.35443			19:50:00	-	-	-0.400101	-1.4903	-0.274601	-0.313507	28.6712
	20:00:00	-1.0441	0.329002	-	-	-	-	7.38686			20:00:00	-	-	-0.997799	-1.3485	-0.732502	-0.314301	28.8748
	20:10:00	-0.883099	0.269997	-	-	-	-	8.13971			20:10:00	-	-	-0.7598	-1.3688	0.353298	-0.3489	29.4108
	20:20:00	-0.641899	-0.253998	-	-	-	-	8.24314			20:20:00	-	-	-0.5061	-1.5457	-0.555099	-0.487396	29.0557
	20:30:00	-0.559898	0.541	-	-	-	-	8.697			20:30:00	-	-	-0.895901	-1.53471	-0.3176	-0.781204	29.2177
	20:40:00	-0.6161	0.157005	-	-	-	-	9.94029			20:40:00	-	-	-1.0845	-1.7346	-0.594002	-1.0433	28.4167
	20:50:00	-0.7589	-0.150002	-	-	-	-	10.0086			20:50:00	-	-	-1.0805	-1.718	-0.515701	-1.0132	29.2448
	21:00:00	-0.712299	0.0019989	-	-	-	-	9.87186			21:00:00	-	-	-1.2432	-1.4316	-0.527199	-1.2435	30.2478
	21:10:00	-0.463299	-0.0669937	-	-	-	-	10.2886			21:10:00	-	-	-1.4764	-1.4593	-0.823101	-0.955605	29.6403
	21:20:00	-0.587803	-0.133003	-	-	-	-	11.1487			21:20:00	-	-	-1.7965	-1.2515	-1.1191	-0.818901	30.0178
	21:30:00	-0.587803	-0.133003	-	-	-	-	11.319			21:30:00	-	-	-0.962601	-1.7389	-0.709702	-1.5223	30.6342
	21:40:00	-	-	0.0475006	2.134	-0.174801	2.341	12.283			21:40:00	-	-	-1.7907	-1.6674	0.163799	-0.509804	30.8082
	21:50:00	-	-	-0.779902	2.374	-0.659903	2.259	11.0633			21:50:00	-	-	-1.5998	-1.4765	0.0468979	-0.617401	29.6788
	22:00:00	-	-	-1.1463	2.048	-1.2976	2.021	10.7166			22:00:00	-	-	-1.4872	-1.5156	0.593502	-0.647499	28.8478
	22:10:00	-	-	-1.2687	0.510994	-1.4325	0.683998	10.5166			22:10:00	-	-	-0.9762	-1.86761	0.667	-1.66351	29.4757
	22:20:00	-	-	-1.5785	0.613998	-1.2848	0.395996	11.53			22:20:00	-	-	-1.4684	-1.7275	-0.902199	-1.8034	29.7137
	22:30:00	-	-	-2.6007	0.661995	-2.9689	0.609001	11.3603			22:30:00	-	-	-1.294	-1.6807	-0.3438	-2.0161	29.3927
	22:40:00	-	-	-2.0183	0.787003	-2.0002	0.616997	11.3096			22:40:00	-	-	-1.209	-1.5889	-0.375599	-1.7308	29.8517
	22:50:00	-	-	-1.132	1.132	-1.207	0.647003	11.1727			22:50:00	-	-	-1.1991	-1.2873	-0.796299	-0.575005	30.2648
	23:00:00	-	-	-1.1718	0.650993	-0.995998	0.264	12.4667			23:00:00	-	-	-1.1697	-1.2509	-1.0694	-0.354004	30.6057
	23:10:00	-	-	-1.2582	1.089	-0.9916	0.688004	13.0809			23:10:00	-	-	-0.633602	-1.4965	-0.138203	-0.6185	31.2478
	23:20:00	-	-	-1.3737	0.925995	-0.8055	0.498993	13.5557			23:20:00	-	-	-0.666698	-1.6021	0.00989914	-1.1757	30.793
	23:30:00	-	-	-1.5634	0.649002	-0.7939	0.336006	13.866			23:30:00	-	-	-1.1119	-1.32401	-0.315701	0.0514984	30.6412
	23:40:00	-	-	-1.8259	0.725998	-0.856499	0.609001	14.6989			23:40:00	-	-	-0.555798	-1.7309	0.4534	-0.269798	30.6473
	23:50:00	-	-	-1.5567	1.493	-0.565601	1.408	15.6344			23:50:00	-	-	-0.927799	-1.5499	-0.2752	-0.202499	30.3905
	24:00	-	-	-2.2709	1.482	-1.1323	1.337	15.1914			24:00	-	-	-1.3504	-1.1454	-0.253201	0.413094	30.3222
	24:10	-	-	-1.4551	0.932007	0.407402	0.437004	15.0663			24:10	-	-	-0.710499	-1.3159	0.217899	0.297203	29.247
	24:20	-	-	-2.0321	1.294	-0.788101	0.999001	14.8511			24:20	-	-	-0.750801	-1.3426	0.111	0.194901	29.2893
	24:30	-	-	-1.8574	0.996002	-0.577	0.751007	15.1066			24:30	-	-	-0.736401	-1.5876	0.361298	0.0164948	29.2612
	24:40	-	-	-1.7615	1.37	-0.0946999	0.842003	14.719			24:40	-	-	-1.3519	-0.913803	-0.980202	0.288101	29.1215
	24:50	-	-	-2.7372	1.369	-0.758698	0.890999	14.392			24:50	-	-	-0.4557	-1.61349	-0.00919724	-0.282799	29.004
	25:00	-	-	-3.2388	2.182	-1.3399	1.616	13.9836			25:00	-	-	-1.093	-1.23251	0.317299	0.400101	28.6867
	25:10	-	-	-2.844	1.207	-1.0569	1.079	14.7824			25:10	-	-	-0.898899	-1.42229	-0.400097	-0.695	28.8073
	25:20	-	-	-3.0556	1.28999	-1.4664	1.34	15.5144			25:20	-	-	-1.1976	-1.3037	-0.0301018	0.0317001	28.8002
