# Supplementary material for: Live imaging of hair bundle polarity acquisition demonstrates a critical timeline for transcription factor Emx2
Source: eLife. 2020 Sep 23;9:e59282. doi: 10.7554/eLife.59282 (PMC7535933; doi:10.7554/eLife.59282)
Supplement: Figure 6—source data 1. [file elife-59282-fig6-data1.xlsx]

## Sheet: Sheet1
	Figure 6--source data 1
	Quantification of ninein area in HCs during each phase of centriole migration.
	Phase I			early Phase II			late Phase II
	HC#	Ninein area (μm2)		HC#	Ninein area (μm2)		HC#	Ninein area (μm2)
	1	0.527		1	3.285		1	1.478
	2	0.459		2	1.928		2	1.278
	3	0.509		3	2.76		3	1.175
	4	0.438		4	1.073		4	0.635
	5	0.405		5	2.366		5	1.281
	6	0.701		6	2.356		6	2.686
	Average	0.5065		7	2.094		7	2.138
				8	1.058		8	0.944
				9	1.289		9	0.274
				10	1.449		10	0.77
				11	0.318		11	0.726
				12	1.092		12	0.71
				13	2.059		13	1.453
				14	1.764		14	0.783
				15	1.826		15	1.465
				16	2.843		16	0.473
				17	0.809		17	0.276
				Average	1.779		18	0.866
							19	0.5
							20	0.494
							21	1.077
							Average	1.02295
	One way ANOVA			Significance	Summary	P Value
	Phase I vs. Early Phase II			Yes	***	0.0005
	Phase I vs. Late Phase II			No	ns	0.2133
	Early Phase II vs. Late Phase II			Yes	**	0.0025
