# Supplementary material for: Live imaging of hair bundle polarity acquisition demonstrates a critical timeline for transcription factor Emx2
Source: eLife. 2020 Sep 23;9:e59282. doi: 10.7554/eLife.59282 (PMC7535933; doi:10.7554/eLife.59282)
Supplement: Figure 6—source data 2. [file elife-59282-fig6-data2.xlsx]

## Sheet: Sheet1
	Figure 6--source data 2
	Anti-ninein staining intensity associated with the MC, DC and area in between the centrioles.
	Phase I					early Phase II					late Phase II
	HC#	Ninein fluorescence intensity				HC#	Ninein fluorescence intensity				HC#	Ninein fluorescence intensity
		MC	Between MC & DC	DC			MC	Between MC & DC	DC			MC	Between MC & DC	DC
	1	125.44	46.221	100.838		1	72.5331	75.6886	108.412		1	99.418	134.378	139.952
	2	131.019	162.872	139.6		2	69.7659	68.7941	96.2224		2	86.8511	111.749	126.411
	3	118.452	135.138	151.187		3	171.29	221.077	138.191		3	112.878	115.353	104.138
	4	115.306	173.032	170.95		4	196.833	92.9778	159.811		4	114.025	103.885	155.737
	5	134.427	106.128	119.311		5	123.403	121.258	122.242		5	145.191	110.167	124.986
	6	92.4625	130.522	94.6037		6	111.427	102.521	99.219		6	125.386	130.515	129.658
	Average	119.518	125.652	129.415		7	61.4381	82.4823	84.4241		7	115.843	139.256	157.414
						8	73.5729	86.705	85.8651		8	127.615	128.407	129.951
						9	74.231	91.289	88.8886		9	164.336	141.057	174.07
						10	100.685	113.766	84.755		10	93.4794	91.7097	83.8693
						11	77.9539	91.5049	62.0492		11	84.3435	66.752	45.7957
						12	82.008	97.2674	91.7294		12	120.86	130.679	118.59
						13	89.2926	129.089	94.96		13	111.822	148.948	105.13
						14	137.967	138.158	115.998		14	113.756	110.639	89.7889
						15	100.214	128.766	87.5167		15	162.563	116.107	110.939
						16	169.62	147.88	138.909		16	175.382	122.23	79.9116
						17	99.3246	116.419	115.412		17	123.094	135.845	118.104
						Average	106.562	112.097	104.388		18	114.423	138.014	152.497
											19	139.791	160.943	135.618
											20	133.575	146.416	104.89
											21	139.927	139.012	122.345
											Average	124.027	124.86	119.514
