# Supplementary material for: Live imaging of hair bundle polarity acquisition demonstrates a critical timeline for transcription factor Emx2
Source: eLife. 2020 Sep 23;9:e59282. doi: 10.7554/eLife.59282 (PMC7535933; doi:10.7554/eLife.59282)
Supplement: Figure 7—figure supplement 1—source data 1. [file elife-59282-fig7-figsupp1-data1.xlsx]

## Sheet: Sheet1
	Figure 7--figure supplement 1--source data 1
	Coordinates of centriole positions relative to the center of Md HC13.
	Md HC13
	Time (hr:min)	Treatment	MC-X relative to the center of the cell (μm)	MC-Y relative to the center of the cell (μm)	DC-X relative to the center of the cell (μm)	DC-Y relative to the center of the cell (μm)
	00:00:00	-	-0.971602	-0.687801	-1.5869	-1.0772
	00:10:00		-0.842501	-0.9131	-1.4554	-1.2046
	00:20:00		-0.912398	-0.789899	-1.3036	-1.5057
	00:30:00		-1.0604	-0.846799	-1.3461	-1.5257
	00:40:00		-0.915599	-0.6591	-1.3707	-1.1376
	00:50:00		-1.0653	-0.577501	-1.2204	-1.4387
	01:00:00		-0.950298	-0.8921	-1.2438	-1.5427
	01:10:00		-0.945401	-0.892799	-1.1899	-1.6496
	01:20:00		-0.974799	-0.6601	-1.2216	-1.4445
	01:30:00	nocodazole	-0.310699	-0.6512	-0.852599	-1.1363
	01:40:00		-1.0055	-0.4387	-0.3879	-0.850701
	01:50:00		-0.849199	-0.1888	-0.3593	-0.464101
	02:00:00		-0.799001	-0.0867995	-0.154401	0.0368996
	02:10:00		-0.827502	-0.0204999	-0.3436	0.0105003
	02:20:00		-0.840902	-0.00909988	-0.3374	-0.112101
	02:30:00	wash out	-0.800898	-0.0585004	-0.249602	-0.339399
	02:40:00		-0.875801	-0.0150002	0.157798	-0.305699
	02:50:00		-1.0773	-0.0796009	-0.255299	-0.707901
	03:00:00		-1.0842	-0.00690025	-0.7024	-1.051
	03:10:00		-1.2281	-0.285201	-0.5877	-1.2453
	03:20:00		-1.3458	-0.449099	-1.2349	-1.5938
	03:30:00		-1.1173	-0.578601	-0.9416	-1.6832
	03:40:00		-1.1875	-0.897401	-0.962702	-1.7164
	03:50:00		-1.1722	-0.899701	-0.297799	-1.4284
	04:00:00		-0.921	-1.2268	-0.8963	-2.098
	04:10:00		-0.918499	-1.0232	-0.961601	-1.9005
	04:20:00		-0.633	-0.872701	-1.0024	-1.9162
	04:30:00		-0.544501	-1.0348	-1.1972	-1.2911
	04:40:00		-0.350599	-0.8365	-0.778501	-1.6118
	04:50:00		-0.305901	-0.9713	-0.810799	-1.427
	05:00:00		-0.322101	-0.9747	-1.0055	-1.644
	05:10:00		-0.416702	-1.0195	-0.921501	-1.7753
	05:20:00		-0.3033	-0.7768	-1.0884	-1.7552
	05:30:00		-0.460598	-0.744299	-0.7314	-1.4448
	05:40:00		-0.492001	-0.782599	-0.504299	-1.6229
	05:50:00		-0.456802	-0.8448	-0.742999	-1.7518
	06:00:00		-0.810702	-0.9196	-0.8352	-1.7004
	06:10:00		-0.5111	-1.1542	-0.369399	-1.8858
	06:20:00		-0.416601	-1.0064	-0.425799	-1.8807
	06:30:00		-0.199599	-1.2402	-0.892298	-2.1078
	06:40:00		-0.330602	-1.2035	-0.382802	-2.3551
	06:50:00		-0.31	-1.1145	-0.1714	-2.1882
	07:00:00		0.0741997	-1.5043	-0.0920982	-2.1534
	07:10:00		0.0587006	-1.5347	-0.513802	-2.2966
	07:20:00		-0.0273009	-1.7942	-0.547599	-2.3804
	07:30:00		0.148799	-1.539	-0.8117	-2.1649
	07:40:00		0.00349991	-1.802	-0.756998	-1.9997
	07:50:00		-0.061799	-1.868	-0.960801	-2.344
	08:00:00		-0.1735	-1.5364	-0.8325	-1.6489
