# Supplementary material for: Live imaging of hair bundle polarity acquisition demonstrates a critical timeline for transcription factor Emx2
Source: eLife. 2020 Sep 23;9:e59282. doi: 10.7554/eLife.59282 (PMC7535933; doi:10.7554/eLife.59282)
Supplement: Figure 7—source data 1. [file elife-59282-fig7-data1.xlsx]

## Sheet: Sheet1
	Figure 7--source data 1
	Coordinates of centriole positions relative to the center of the cell for Md HC10, MD HC11 and Md HC12.
	Md HC10 (Phase I)								Md HC11 (early Phase II)								Md HC12 (Late Phase II)
	Time (hr:min)	Treatment	MC-X relative to the center of the cell (μm)	MC-Y relative to the center of the cell (μm)	DC-X relative to the center of the cell (μm)	DC-Y relative to the center of the cell (μm)			Time (hr:min)	Treatment	MC-X relative to the center of the cell (μm)	MC-Y relative to the center of the cell (μm)	DC-X relative to the center of the cell (μm)	DC-Y relative to the center of the cell (μm)			Time (hr:min)	Treatment	MC-X relative to the center of the cell (μm)	MC-Y relative to the center of the cell (μm)	DC-X relative to the center of the cell (μm)	DC-Y relative to the center of the cell (μm)
	00:00:00	-	0.504101	0.376801	0.0326996	0.6012			00:00:00	-	-0.735001	-0.153599	-1.1211	0.0662003			00:00:00	-	-1.1919	-0.457701	-1.0459	-0.7192
	00:10:00		0.2323	0.245201	-0.165001	0.312401			00:10:00		-0.7384	-0.00780106	-1.0216	-0.0115013			00:10:00		-1.171	-0.6518	-1.0422	-1.1379
	00:20:00		0.361103	0.5382	0.0145035	0.4338			00:20:00		-0.800201	0.2705	-0.9758	-0.0569			00:20:00		-1.2807	-0.687399	-1.2056	-0.9617
	00:30:00		0.245899	0.431499	-0.0688019	0.428501			00:30:00		-0.617401	0.0970993	-0.9034	0.127602			00:30:00		-1.1163	-0.594799	-1.2383	-1.1306
	00:40:00		-0.1068	0.4613	-0.0155029	0.457699			00:40:00		-0.604202	0.270699	-0.861801	-0.042202			00:40:00		-1.0765	-0.407799	-1.452	-0.9725
	00:50:00		0.0195007	0.647999	-0.237598	0.444901			00:50:00		-0.4375	0.225498	-1.0121	-0.168404			00:50:00		-1.2917	-0.6467	-1.4137	-1.338
	01:00:00		0.150303	0.482502	-0.134098	0.347599			01:00:00		-0.506599	-0.106899	-1.2184	-0.1791			01:00:00		-1.1525	-0.4214	-1.2893	-1.3194
	01:10:00		-0.0681992	0.3232	-0.0977974	0.153198			01:10:00		-0.324001	-0.2057	-0.9921	0.0300026			01:10:00		-0.959099	-0.298201	-0.8941	-1.0772
	01:20:00		0.00409698	0.668499	-0.276802	0.433601			01:20:00		-0.4053	-0.268898	-1.3385	0.0399017			01:20:00		-1.0469	-0.507	-0.861	-0.9697
	01:30:00	nocodazole	0.246899	-0.551201	-0.221703	-0.317604			01:30:00	nocodazole	0.853302	-0.169498	-0.0870972	0.0565987			01:30:00	nocodazole	-0.619102	-0.7353	-0.896702	-0.8839
	01:40:00		0.524799	0.709801	0.284401	0.583801			01:40:00		0.533298	0.181698	-0.146	-0.0587997			01:40:00		-0.841797	-0.813499	-1.6334	-0.4753
	01:50:00		0.139198	0.569901	0.5522	0.231903			01:50:00		0.704697	-0.00400162	-0.0114021	-0.325001			01:50:00		-0.765999	-0.440399	-1.2433	-0.9242
	02:00:00		0.815903	0.783806	0.589401	0.451202			02:00:00		0.687401	0.223701	0.16	-0.572701			02:00:00		-0.534397	-0.3724	-0.247597	0.562799
	02:10:00		0.514301	0.668602	0.257301	0.464897			02:10:00		0.218102	0.6213	0.464699	0.0415993			02:10:00		-0.499699	-0.3363	-0.2444	-0.183399
	02:20:00		0.4104	0.788704	0.2047	0.514503			02:20:00		0.4394	0.388	0.759296	0.3899			02:20:00		-0.4618	-0.100399	-0.0624008	-0.2736
	02:30:00	wash out	0.125401	0.677498	-0.0112	0.430298			02:30:00	wash out	0.558197	0.384499	1.008	-0.0124016			02:30:00	wash out	-0.475903	-0.2265	-0.1297	0.173401
	02:40:00		-0.120499	0.231598	-0.321201	-0.0413055			02:40:00		0.302803	0.458599	0.0638008	-0.040802			02:40:00		-0.729202	-0.7036	-0.111603	-0.8311
	02:50:00		0.0195007	0.413101	-0.4049	0.208			02:50:00		0.0332985	0.329998	-0.362	-0.0522995			02:50:00		-0.780998	-1.0906	-0.476997	-0.6679
	03:00:00		0.0345001	-0.109001	-0.637001	-0.124802			03:00:00		-0.234699	0.201397	-0.106098	-0.775303			03:00:00		-0.756901	-0.946201	-0.417603	-0.9389
	03:10:00		-0.1418	-0.4403	-0.856899	-0.753098			03:10:00		-0.0704994	0.0811005	-0.413002	-0.505001			03:10:00		-1.1866	-0.921801	-1.2395	-1.3896
	03:20:00		-0.3074	-0.4813	-0.830097	-0.547302			03:20:00		-0.169899	-0.0552979	-0.710697	-0.406399			03:20:00		-0.728401	-1.218	-1.6418	-1.7953
	03:30:00		0.0405998	-0.1745	-0.263103	-0.644997			03:30:00		0.132301	-0.123299	-0.455101	-0.5061			03:30:00		-0.310398	-1.0065	-1.5513	-1.6902
	03:40:00		-0.0797005	-0.0623016	-0.313202	-0.454102			03:40:00		0.170902	-0.0923004	-0.1217	-0.3494			03:40:00		-0.3158	-1.0024	-1.5011	-1.8085
	03:50:00		-0.210999	-0.183395	-0.103298	-0.647896			03:50:00		0.1819	-0.0333977	-0.3652	-0.0971985			03:50:00		-0.542297	-0.727501	-1.6923	-1.5773
	04:00:00		-0.420101	-0.176201	-0.741302	-0.596703			04:00:00		-0.330799	0.0424995	-0.6604	-0.308701			04:00:00		-1.1035	-0.6304	-1.6746	-1.2102
	04:10:00		-0.2728	-0.328201	-0.601898	-0.803101			04:10:00		-0.4394	-0.1577	-0.561501	-0.0503998			04:10:00		-1.1622	-0.7701	-1.7193	-1.17
	04:20:00		-0.387901	-0.416702	-0.684601	-0.830299			04:20:00		0.0471992	-0.108002	-0.2854	-0.155399			04:20:00		-0.854698	-0.7342	-1.8425	-1.3035
	04:30:00		-0.555	-0.508598	-0.753899	-0.8666			04:30:00		-0.0454979	0.2481	-0.5933	0.18			04:30:00		-0.954498	-0.983799	-1.5264	-1.3254
	04:40:00		0.0371017	-0.3564	-0.361	-0.847305			04:40:00		0.135101	0.184101	-0.4632	0.106503			04:40:00		-0.600098	-0.622601	-1.2115	-1.4732
	04:50:00		-0.32	-0.411804	-0.600899	-0.958702			04:50:00		-0.231899	-0.1665	-0.731197	0.00859833			04:50:00		-0.5564	-0.7974	-1.1058	-1.4025
	05:00:00		-0.337097	-0.379204	-0.511097	-0.777702			05:00:00		0.00550079	-0.3494	-0.798199	0.0475998			05:00:00		-0.558598	-0.648001	-1.0076	-1.6595
	05:10:00		-0.563202	-0.388	-0.837601	-0.699799			05:10:00		0.287701	-0.2654	-0.454098	-0.0734024			05:10:00		-0.932598	-0.577801	-1.1325	-1.4004
	05:20:00		-0.399799	-0.4645	-0.712997	-0.665901			05:20:00		0.444603	-0.255798	-0.274197	-0.094902			05:20:00		-0.693699	-0.9058	-1.179	-1.631
	05:30:00		-0.247402	-0.733696	-0.545101	-0.725494			05:30:00		0.753498	-0.309097	-0.226002	0.174004			05:30:00		-0.705303	-0.829899	-1.2556	-1.1393
	05:40:00		-0.3255	-0.483604	-0.407799	-0.757904			05:40:00		0.862297	-0.190201	-0.1973	-0.165802			05:40:00		-1.1105	-1.0907	-1.2868	-1.0907
	05:50:00		-0.245403	-0.780098	-0.379402	-1.2475			05:50:00		0.413601	-0.358101	-0.452698	-0.0307999			05:50:00		-0.880802	-1.1847	-1.279	-1.5247
	06:00:00		-0.202599	-0.651802	-0.358398	-1.1626			06:00:00		0.5877	-0.109802	-0.527298	0.0240936			06:00:00		-0.423801	-1.348	-1.226	-1.6045
	06:10:00		-0.246899	-0.619293	-0.425198	-1.05199			06:10:00		0.521603	0.108101	-0.237301	0.223297			06:10:00		-0.6842	-1.0772	-1.2564	-1.6138
	06:20:00		0.059803	-0.635696	-0.441498	-1.0331			06:20:00		0.771	0.0503998	-0.157101	0.0712967			06:20:00		-0.844601	-1.049	-1.3383	-1.4984
	06:30:00		-0.153099	-0.397301	-0.355797	-0.951599			06:30:00		0.7449	0.6297	-0.193401	0.352806			06:30:00		-0.853401	-0.968102	-1.4827	-1.4982
	06:40:00		-0.2686	-0.161201	-0.523998	-0.661598			06:40:00		0.8568	0.636803	-0.3368	0.3592			06:40:00		-0.896599	-0.800901	-1.3346	-1.4981
	06:50:00		-0.281502	-0.372597	-0.376499	-0.887695			06:50:00		0.493999	0.610901	-0.596699	0.257904			06:50:00		-0.5285	-0.8321	-1.3141	-1.5453
	07:00:00		-0.0713005	-0.527504	-0.385799	-0.8283			07:00:00		0.231602	0.399002	-0.7896	0.257599			07:00:00		-0.706001	-0.657501	-1.1214	-1.3743
	07:10:00		-0.3806	-0.138596	-0.709	-0.572395			07:10:00		0.4062	0.331902	-0.536098	-0.0205994			07:10:00		-0.4319	-0.610401	-1.3071	-1.4291
	07:20:00		-0.0616989	0.2547	-0.199299	-0.3013			07:20:00		0.231197	0.175102	-0.199001	0.2929			07:20:00		-0.735199	-0.560801	-1.1588	-1.4306
	07:30:00		-0.108803	0.149597	-0.00230026	-0.3834			07:30:00		0.249699	0.0265045	-0.134102	0.400803			07:30:00		-0.8908	-0.8001	-1.168	-1.2633
	07:40:00		-0.0337029	0.0927048	-0.183201	-0.605095			07:40:00		0.347698	0.226601	-0.0424995	0.753601			07:40:00		-0.698399	-0.6775	-1.1827	-0.954599
	07:50:00		-0.143299	0.210701	-0.158001	-0.446198			07:50:00		0.5014	0.228104	-0.176598	0.951202			07:50:00		-0.712601	-0.778601	-1.1489	-1.2524
	08:00:00		-0.175098	-0.146896	-0.249798	-0.745102			08:00:00		0.364799	0.0975037	-0.308201	0.694603			08:00:00		-0.690899	-0.702101	-1.1871	-1.0276
