# Supplementary material for: Live imaging of hair bundle polarity acquisition demonstrates a critical timeline for transcription factor Emx2
Source: eLife. 2020 Sep 23;9:e59282. doi: 10.7554/eLife.59282 (PMC7535933; doi:10.7554/eLife.59282)
Supplement: Figure 8—source data 1. [file elife-59282-fig8-data1.xlsx]

## Sheet: Sheet1
	Figure 8--source data 1
	Coordinates of centriole positions relative to the center of the cell for Md HC14 and MD HC15.
	Md HC14 (Phase II late, E13.5)								Md HC15 (Phase II late, E13.5)
	Time (hr:min)	Treatment	MC-X relative to the center of the cell (μm)	MC-Y relative to the center of the cell (μm)	DC-X relative to the center of the cell (μm)	DC-Y relative to the center of the cell (μm)			Time (hr:min)	Treatment	MC-X relative to the center of the cell (μm)	MC-Y relative to the center of the cell (μm)	DC-X relative to the center of the cell (μm)	DC-Y relative to the center of the cell (μm)
	00:00:00	-	-0.101299	-1.3038	-0.481602	-1.7967			00:00:00	-	-0.548199	-0.7514	-1.2853	-0.441898
	00:10:00		-0.263401	-1.0064	-0.6614	-1.6634			00:10:00		-0.515598	-0.672699	-1.2978	-0.438
	00:20:00		-0.327103	-0.902702	-0.612801	-1.6666			00:20:00		-0.509201	-0.765202	-1.3349	-0.344601
	00:30:00		-0.339401	-1.0015	-0.811501	-1.8303			00:30:00		-0.484699	-0.729	-1.2214	-0.5312
	00:40:00		-0.223	-0.965603	-0.843903	-1.7744			00:40:00		-0.485199	-0.613598	-1.1446	-0.347698
	00:50:00		-0.0060997	-1.0008	-0.933899	-1.6983			00:50:00		-0.3055	-0.642197	-0.979099	-0.321899
	01:00:00		-0.105202	-1.0372	-0.9492	-1.9156			01:00:00		-0.0580978	-0.641502	-0.793697	-0.372501
	01:10:00		-0.443199	-1.0506	-0.6259	-1.7655			01:10:00		-0.186398	-0.643497	-0.939098	-0.4464
	01:20:00		-0.198196	-1.0756	-0.855396	-1.7863			01:20:00		-0.2971	-0.761299	-0.9501	-0.252201
	01:30:00		-0.236797	-1.2178	-0.889797	-1.7256			01:30:00		-0.218201	-0.653603	-1.0591	-0.3535
	01:40:00	nocodazole	0.0752983	-1.2526	-0.6157	-1.5606			01:40:00	nocodazole	0.0472984	-0.644699	-0.6479	-0.283199
	01:50:00		0.354	-0.652401	-0.302299	-1.1087			01:50:00		0.0314026	-0.7803	-0.576897	-0.489403
	02:00:00		0.166599	-0.1063	-0.3517	-0.245201			02:00:00		-0.00299835	-0.863701	-0.6759	-0.258301
	02:10:00		0.328701	-0.355701	-0.518997	-0.223701			02:10:00		0.0186996	-0.769302	-0.630001	-0.269699
	02:20:00		0.246601	-0.0605011	-0.572002	0.208599			02:20:00		0.0886993	-0.717602	-0.756901	-0.200699
	02:30:00		0.0635986	-0.331802	-0.4025	0.434597			02:30:00		0.026001	-0.6143	-0.616901	-0.260201
	02:40:00		-0.0471001	0.0429993	-0.0119019	0.672699			02:40:00		0.108803	-0.522499	-0.534698	-0.152199
	02:50:00		0.0100021	0.0326004	0.122402	0.460602			02:50:00		0.266499	-0.618698	-0.614799	-0.109901
	03:00:00		0.0904007	-0.314999	-0.0917015	0.380699			03:00:00		0.1297	-0.711399	-0.554699	-0.219902
	03:10:00		0.399799	-0.174198	0.099102	0.024601			03:10:00		0.1036	-0.705799	-0.533401	-0.195999
	03:20:00		0.190399	-0.1632	0.199997	0.256199			03:20:00		0.156002	-0.567699	-0.566097	-0.0358009
	03:30:00		-0.220802	0.0540009	0.072998	0.3578			03:30:00		0.1213	-0.646099	-0.619301	-0.0502014
	03:40:00		-0.534401	0.1376	0.0606995	0.313099			03:40:00		0.107899	-0.701	-0.625103	-0.1954
	03:50:00		-0.439003	0.2663	0.1903	0.362999			03:50:00		0.235203	-0.6535	-0.674297	-0.1394
	04:00:00		-0.6255	0.226101	0.2607	0.268902			04:00:00		0.220501	-0.524597	-0.777802	-0.192497
	04:10:00		-0.427299	-0.139702	0.2658	0.363899			04:10:00		0.1129	-0.6381	-0.793999	-0.188599
	04:20:00		-0.378403	-0.0858002	-0.0457993	0.762199			04:20:00		0.184101	-0.468899	-0.641399	-0.151897
	04:30:00		0.187298	-0.0223007	0.4184	0.565498			04:30:00		0.109402	-0.687298	-0.749401	-0.339397
	04:40:00		0.5466	-0.260101	0.220501	0.310497			04:40:00		0.190998	-0.662903	-0.752201	-0.309002
	04:50:00		0.424599	0.137897	-0.00069809	0.525497			04:50:00		0.4347	-0.729698	-0.488102	-0.384598
	05:00:00		0.350403	-0.2174	0.263	0.409397			05:00:00		0.468498	-0.6166	-0.5714	-0.147099
	05:10:00		0.224602	-0.274403	0.380501	0.604298			05:10:00		0.365601	-0.517601	-0.549	0.0222015
	05:20:00		0.1833	-0.297997	0.499603	0.850002			05:20:00		0.333801	-0.5158	-0.650501	-0.134499
	05:30:00		-0.166603	-0.743702	0.297798	0.439598			05:30:00		0.221901	-0.569103	-0.7514	-0.161404
	05:40:00		0.146202	-0.391602	0.5476	0.788399			05:40:00		0.261101	-0.440899	-0.735901	-0.141102
	05:50:00		-0.643703	-0.769497	0.0409966	0.712601			05:50:00		0.2589	-0.349701	-0.7528	-0.1866
	06:00:00		-0.464699	-0.823002	-0.0135994	0.783001			06:00:00		0.205399	-0.404598	-0.8587	-0.130398
	06:10:00		-0.2855	-1.0522	0.2738	0.508301			06:10:00		0.0694008	-0.304096	-0.926201	-0.140198
	06:20:00		-0.294201	-0.689899	0.449699	0.938999			06:20:00		0.271	-0.146999	-0.827	-0.1269
	06:30:00		-0.4123	-0.778301	0.0298004	0.783398			06:30:00		0.091301	-0.223297	-0.9408	0.0522995
	06:40:00		-0.506802	-0.706802	0.251698	0.899097			06:40:00		0.2118	-0.204597	-0.879902	0.0587006
	06:50:00		-0.3811	-0.617203	0.5966	0.149799			06:50:00		0.213001	-0.0906982	-0.977798	0.249199
	07:00:00		-0.5998	-0.4231	0.4081	-0.194901			07:00:00		0.287502	-0.249199	-0.889896	0.0523987
	07:10:00		-0.455601	-0.497898	0.699699	-0.281799			07:10:00		0.125099	-0.0922012	-0.899498	0.0931015
	07:20:00		-0.529999	-0.308201	0.478199	-0.314899			07:20:00		0.2285	-0.011898	-0.844498	0.0838013
	07:30:00		-0.316799	-0.2897	0.487301	-0.3503			07:30:00		0.114002	0.00629807	-0.947998	0.128399
	07:40:00		-0.198101	-0.609501	0.306	-0.594501			07:40:00		0.2103	0.00839996	-0.860897	0.159298
