# Supplementary material for: Live imaging of hair bundle polarity acquisition demonstrates a critical timeline for transcription factor Emx2
Source: eLife. 2020 Sep 23;9:e59282. doi: 10.7554/eLife.59282 (PMC7535933; doi:10.7554/eLife.59282)
Supplement: Figure 8—source data 2. [file elife-59282-fig8-data2.xlsx]

## Sheet: Sheet1
	Figure 8--source data 2
	Timing of the DC to lose its peripheral position under nocodazole treatments.
			HC #
			Within 1 hr		1.2-6 hr		Maintain peripheral position at 6 hr
	E13.5 late Phase II		17 (60.7 %)		6 (21.4 %)		5 (17.9 %)			p-value (Chi-square test)
	E14.5 late Phase II		10 (20%)		6 (12 %)		34 (68 %)			p-0.000089
