# Supplementary material for: Live imaging of hair bundle polarity acquisition demonstrates a critical timeline for transcription factor Emx2
Source: eLife. 2020 Sep 23;9:e59282. doi: 10.7554/eLife.59282 (PMC7535933; doi:10.7554/eLife.59282)
Supplement: Figure 9—source data 1. [file elife-59282-fig9-data1.xlsx]

## Sheet: Sheet1
	Figure 9--source data 1
	Coordinates of centriole positions during the 2 hrs of live imaging.
	Phase I						Phase II early						Phase II late
	Time (hr:min)	MC-X relative to the center of the cell (μm)	MC-Y relative to the center of the cell (μm)	DC-X relative to the center of the cell (μm)	DC-Y relative to the center of the cell (μm)		Time (hr:min)	MC-X relative to the center of the cell (μm)	MC-Y relative to the center of the cell (μm)	DC-X relative to the center of the cell (μm)	DC-Y relative to the center of the cell (μm)		Time (hr:min)	MC-X relative to the center of the cell (μm)	MC-Y relative to the center of the cell (μm)	DC-X relative to the center of the cell (μm)	DC-Y relative to the center of the cell (μm)
	00:00:00	0.287399	-0.313896	-0.0121002	-0.736099		00:00:00	-0.576805	-0.577995	-1.3328	-0.253998		00:00:00	-1.5476	-0.9244	-1.7595	-0.573502
	00:10:00	0.249603	-0.244102	0.428505	-0.579803		00:10:00	-0.478798	-0.435997	-1.3212	-0.263		00:10:00	-1.4345	-0.786598	-1.7487	-0.565903
	00:20:00	0.260597	-0.215302	0.273102	-0.471298		00:20:00	-0.407799	-0.528	-1.3366	-0.312004		00:20:00	-1.4531	-0.918999	-1.7279	-0.697701
	00:30:00	0.181198	-0.418701	0.0398026	-0.571899		00:30:00	-0.293602	-0.647003	-1.2656	-0.150002		00:30:00	-1.3549	-0.822098	-1.7676	-0.735596
	00:40:00	0.117302	-0.318405	0.3582	-0.6185		00:40:00	-0.234398	-0.614006	-1.2064	-0.161003		00:40:00	-1.2227	-0.797203	-1.6574	-0.709404
	00:50:00	-0.0239944	-0.416595	0.0366058	-0.582901		00:50:00	-0.234695	-0.609001	-1.2283	-0.306		00:50:00	-1.1655	-0.737801	-1.5665	-1.038
	01:00:00	0.082695	-0.389702	0.253494	-0.716995		01:00:00	-0.086998	-0.460999	-1.1454	-0.00799561		01:00:00	-1.0732	-0.688797	-1.386	-1.0512
	01:10:00	0.203201	-0.3311	0.254601	-0.270302		01:10:00	0.00389862	-0.513	-1.2057	-0.189003		01:10:00	-1.0736	-0.5755	-1.3264	-0.737801
	01:20:00	0.178406	-0.340103	0.0661011	-0.5382		01:20:00	0.0781021	-0.455002	-1.1099	-0.217003		01:20:00	-1.0399	-0.507599	-1.3173	-0.584099
	01:30:00	0.158501	-0.357796	0.433899	-0.133499		01:30:00	-0.0194016	-0.436005	-1.013	0.0179977		01:30:00	-1.0243	-0.523201	-1.3563	-0.2556
	01:40:00	0.254501	-0.443596	0.234001	-0.157097		01:40:00	-0.1642	-0.480003	-1.2658	-0.199005		01:40:00	-0.895302	-0.587296	-1.327	-0.668396
	01:50:00	0.274498	-0.566803	0.271896	-0.0351028		01:50:00	-0.0641022	-0.472	-1.1009	-0.601997		01:50:00	-0.990799	-0.547501	-1.1314	-0.771301
	02:00:00	0.138306	-0.604897	0.2062	-0.0506973		02:00:00	-0.0699005	-0.320999	-1.0527	-0.580002		02:00:00	-0.790703	-0.448502	-1.2833	-0.7043
